# Supplementary material for: Targeted DNA demethylation of the Arabidopsis genome using the human TET1 catalytic domain
Source: PubMed Central journal article supplement (PMC5834696; doi:10.1073/pnas.1716945115), 2018-02-14
Supplement: pnas.1716945115.sd01.pdf [file pnas.1716945115.sd01.pdf]

**pUBQ10::ZF108\_3xFlag\_TET1cd**

pUBQ10

BLRP

ZF108

3xFlag

TET1cd

OCS term

AGTCTAGCTCAACAGAGCTTTTAACCCAAATTGGTACAATAGAATACAACCTTAGAT  
CATAATTCTCAAAGAAAGAGATTCCCTTAGCTATTCTATCTGCCACTCCATTTCCCTC  
TCGGCTTGTATGCACAAGCATAAAATCCTCAAACCTTGCTAAGTAGATACTTTATGTC  
TTGGATAATTGGATTGAGACTTGACAAGCATAACTTTCATGTAACCAAAGACACAAG  
TTGCTGAGAATCCACCTCAAAAATGATCTTCCCTATAATTGAATCGGGATAATGACAG  
CACAGCCCATCTAAGAGCCTCCACTTCTACTTCCAGCACGCTTCTTACTTTTACCAC  
AGCTCTTGCACCTAACATAACACCTTCCCTGTATGATCGCGAAGCACCCACCCTA  
AGCCACATTTAATCCTTCTGTTGGCCATGCCCCATCAAAGTTGCACTTAACCCAAG  
ATTGTGGTGGAGCTTCCCATGTTTCTCGTCTGTCCCAGCGGTGTTGTGGTTGGTGC  
TTTCTTACATTCTGAGCCTCTTCCCTTCTAATCCACTCATCTGCATCTTCTTGTGTC  
CTACTAATACCTCATTGGTTCCAAATTCCTCCCTTAAGCACAGCTCGTTTCTG  
TTCTTCCACAGCCTCCCAAGTATCCAAGGGACTAAAGCCTCCACATTCTTCCAGATC  
AGGATATTCTTGTTAAGATGTTGAACTCTATGGAGGTTTGTATGAACTGATGATCT  
AGGACCGGATAAGTTCCCTTCTTCATAGCGAACTTATTCAAAGAATGTTTTGTGTAT  
CATTCTTGTTACATTGTTATTAATGAAAAAATATTATTGGTCATTGGACTGAACACGA  
GTGTTAAATATGGACCAGGCCCAAATAAGATCCATTGATATATGAATTAATAACA  
AGAATAAATCGAGTCACCAAACCACTTGCCTTTTTAACGAGACTTGTTACCAACT  
TGATACAAAAGTCATTATCCTATGCAAATCAATAATCATACAAAAATATCCAATAACA  
CTAAAAAATTAAGAAATGGATAATTTACAATATGTTATACGATAAAGAAGTTACT  
TTTCCAAGAAATTCCTGATTTTATAAGCCCACTTGCATTAGATAAATGGCAAAAAA  
AAACAAAAGGAAAAGAAATAAAGCACGAAGAATTCTAGAAAATACGAAATACGCTT  
CAATGCAGTGGGACCCACGGTTCAATTATTGCCAATTTTCAGCTCCACCGTATATTT  
AAAAAATAAACGATAATGCTAAAAAATAAAATCGTAACGATCGTTAAATCTCAAC  
GGCTGGATCTTATGACGACCGTTAGAAATTGTGGTTGTCGACGAGTCAGTAATAAA  
CGGCGTCAAAGTGGTTGCAGCCGGCACACACGAGTCGTGTTTATCAACTCAAAGC  
ACAAATACTTTTCTCAACCTAAAAATAAGGCAATTAGCCAAAAACAACCTTTCGCTG  
TAAACAACGCTCAATACACGTGTCATTTTATTATTAGCTATTGCTTACCAGCCTTAG  
CTTCTCGTGACCTAGTCGTCCTCGTCTTTTCTTCTTCTTCTTCTATAAAACAATACC  
CAAAGAGCTCTTCTTCTTCACAATTCAGATTTCAATTTCTCAAATCTTAAAACTTT  
CTCTCAATTCTCTACCGTGATCAAGGTAATTTCTGTGTTCCCTTATTCTCTCAAAA  
TCTTCGATTTTGTTCGTTTCGATCCCAATTCGTATATGTTCTTTGGTTAGATTCT  
GTTAATCTTAGATCGAAGACGATTTTCTGGGTTTGATCGTTAGATATCATCTTAATTC  
TCGATTAGGGTTTCATAGATATCATCCGATTTGTTCAAATAATTTGAGTTTTGTCGAA  
TAATACTCTTCGATTTGTGATTTCTATCTAGATCTGGTGTAGTTTCTAGTTTGTGC  
GATCGAATTTGTCGATTAATCTGAGTTTTTCTGATTAACAGACGCGTCCATGGTTGG  
GTACCAACAAATGGCTGGTGGACTTAACGATATCTTCGAAGCTCAGAAGATTGAAT  
GGCATGAGGATACTGGTGGATCTAGCATCCCCGGACTTGAGGTTCTTTTCCAAGG  
ACCTCTCGAGCCTTATAAATGCCCTGAGTGTGGAAAATCTTCTCTCAATCTGGAG

ATCTTAGGAGGCACCAAAGGACCCATACCGGTGAAAAACCTTATAAATGCCCTGAG  
TGTGAAAAATCATTAGTAGGAGTGATCATCTTACCACCCATCAGAGGACCCATAC  
TGGTAAAAACCTTATAAATGCCCTGAGTGTGGAAAATCATTCTCACAATCTTCATC  
TCTTGTTAGGCATCAGAGGACTCATACCGGAGAAAAACCTTATAAATGCCCTGAGT  
GTGGAAAATCATTCTCAACATCTGGAAACCTTGTTAGGCACCAAAGGACCCATACT  
GGTAAAAACCTTATAAATGCCCTGAGTGTGGAAAATCATTCTCTCAGAGAGCAAA  
CCTTAGGGCTCATCAAAGGACACACACTGGAGAAAAACCTTATAAATGCCCTGAGT  
GTGGAAAATCTTTCTCTAGGAGTGATAAGCTCACCGAGCATCAAAGGACTCACACC  
GGA

CTCGAGGACTACAAAGACGATGACGACAAAGACTACAAAGACGATGACGACA  
AAGACTACAAAGACGATGACGACAAAAAGCTTGATATCGCCATGGGGGGCGCGCC  
AAGCTATCAAACAAGTTTGTACAAAAAGCAGGCTCCGCGGCCGCCCCCTTCACCA  
TGGGATCCCTGCCACCTGCAGCTGTCTTGATCGAGTTATACAAAAAGACAAAGGC  
CCATATTATACACACCTTGGGGCAGGACCAAGTGTTGCTGCTGTCAGGGAAATCAT  
GGAGAATAGGTATGGTCAAAAAGGAAACGCAATAAGGATAGAAATAGTAGTGACA  
CCGGTAAAGAAGGGAAAAGCTCTCATGGGTGTCCAATTGCTAAGTGGGTTTTAAGA  
AGAAGCAGTGATGAAGAAAAAGTTCTTTGTTTGGTCCGGCAGCGTACAGGCCACC  
ACTGTCCAAGTGTGATGGTGGTGTCTCATCATGGTGTGGGATGGCATCCCTCTT  
CCAATGGCCGACCGGCTATACACAGAGCTCACAGAGAATCTAAAGTCATACAATGG  
GCACCCTACCGACAGAAGATGCACCCTCAATGAAAATCGTACCTGTACATGTCAAG  
GAATTGATCCAGAGACTTGTGGAGCTTCATTCTCTTTTGGCTGTTTCATGGAGTATGT  
ACTTTAATGGCTGTAAGTTTGGTAGAAGCCCAAGCCCCAGAAGATTTAGAATTGAT  
CCAAGCTCTCCCTTACATGAAAAAACCTTGAAGATAACTTACAGAGTTTGGCTACA  
CGATTAGCTCCAATTTATAAGCAGTATGCTCCAGTAGCTTACCAAATCAGGTGGA  
ATATGAAAATGTTGCCCGAGAATGTCGGCTTGGCAGCAAGGAAGTTCGACCCTTC  
TCTGGGGTCACTGCTTGCTGGACTTCTGTGCTCATCCCCACAGGGACATTCACAA  
CATGAATAATGGAAGCACTGTGGTTTTGTACCTTAACTCGAGAAGATAACCGCTCTTT  
GGGTGTTATTCTCAAGATGAGCAGCTCCATGTGCTACCTCTTTATAAGCTTTTCAGA  
CACAGATGAGTTTGGCTCCAAGGAAGGAATGGAAGCCAAGATCAAATCTGGGGCC  
ATCGAGGTCCTGGCACCCCGCCGCAAAAAAAGAACGTGTTTCACTCAGCCTGTTT  
CCCGTTCTGGAAAGAAGAGGGCTGCGATGATGACAGAGGTTCTTGCACATAAGAT  
AAGGGCAGTGGAAAAGAAACCTATTCCCCGAATCAAGCGGAAGAATAACTCAACAA  
CAACAAACAACAGTAAGCCTTCGTCACTGCCAACCTTAGGGAGTAACACTGAGACC  
GTGCAACCTGAAGTAAAAAGTGAACCGAACCCCATTTTATCTTAAAAAGTTCAGAC  
AACACTAAAACCTTATTGCTGATGCCATCCGCTCCTCACCCAGTGAAAGAGGCATC  
TCCAGGCTTCTCCTGGTCCCCGAAGACTGCTTCAGCCACACCAGCTCCACTGAAG  
AATGACGCAACAGCCTCATGCGGGTTTTTCAGAAAGAAGCAGCACTCCCCACTGTA  
CGATGCCTTCGGGAAGACTCAGTGGTGCCAATGCTGCAGCTGCTGATGGCCCTGG  
CATTTACAGCTTGGCGAAGTGGCTCCTCTCCCCACCCTGTCTGCTCCTGTGATGG  
AGCCCCTCATTAAATTCTGAGCCTTCCACTGGTGTGACTGAGCCGCTAACGCCTCAT  
CAGCCAAACCACCAGCCCTCCTTCCCTCACCTCTCCTCAAGACCTTGCCTCTTCTCC  
AATGGAAGAAGATGAGCAGCATTCTGAAGCAGATGAGCCTCCATCAGACGAACCC  
CTATCTGATGACCCCTGTACCTGCTGAGGAGAAATTGCCCCACATTGATGAGTA  
TTGGTCAGACAGTGAGCACATCTTTTTGGATGCAAATATTGGTGGGGTGGCCATCG  
CACCTGCTCACGGCTCGGTTTTGATTGAGTGTGCCCGGCGAGAGCTGCACGCTAC  
CACTCCTGTTGAGCACCCCAACCGTAATCATCCAACCCGCCTCTCCCTTGTCTTTT  
ACCAGCACAAAAACCTAAATAAGCCCCAACATGTTTTGAACTAAACAAGATTAAGT

TTGAGGCTAAAGAAGCTAAGAATAAGAAAATGAAGGCCTCAGAGCAAAAAGACCAG  
GCAGCTAATGAAGGTCCAGAACAGTCCTCTGAAGTAAATGAATTGAACCAAATTCC  
TTCTCATAAAGCATTAAACATTAACCCATGACAATGTTGTCACCGTGTCCCCTTATGC  
TCTCACACACGTTGCGGGGCCCTATAACCATTGGGTCTGA AAGGGTGGGCGCGCC  
GACCCAGCTTTCTTGTACAAAGTGGTTTCGATAATTCCTTAATTAAGTACTAGTTCTAGAG  
CGGCCGCCACCGCGGTGGAGCTCCTAGGTGAGTCTAGAGAGTTAATTAAGACCCG  
GGACTAGTCCCTAGAGTCCCTGCTTTAATGAGATATGCGAGACGCCTATGATCGCAT  
GATATTTGCTTTCAATTCTGTTGTGCACGTTGTAAAAACCTGAGCATGTGTAGCTC  
AGATCCTTACCGCCGGTTTCGGTTCATTCTAATGAATATATCACCCGTTACTATCGT  
ATTTTTATGAATAATATTCTCCGTTCAATTTACTGATTGTACCCTACTACTTATATGTA  
CAATATTAATAAATGAAAACAATATATTGTGCTGAATAGGTTTATAGCGACATCTATGAT  
AGAGCGCCACAATAACAAACAATTGCGTTTTATTATTACAAATCCAATTTTAAAAAAA  
GCGGCAGAACCGGTCAAACCTAAAAGACTGATTACATAAATCTTATTCAAATTTCAA  
AAGTGCCCCAGGGGCTAGTATCTACGACACACCGAGCGGCGAACTAATAACGCTC  
ACTGAAGGGAACCTCCGGTTCGCCGCGCGCATGGGTGAGATTCCTTGAAGTT  
GAGTATTGGCCGTCCGCTCTACCGAAAGTTACGGGCACCATTCAACCCGGTCCAG  
CACGGCGGCCGGGTAACCGACTTGCTGCCCGAGAATTATGCAGCATTTTTTTGG  
TGTATGTGGGCCCAAATGAAGTGCAGGTCAAACCTTGACAGTGACGACAAATCGT  
TGGCGGGTCCAGGGCGAATTTTGCACGAGCT

**pUBQ10::ZF108\_3xFlag\_YPet**

pUBQ10

BLRP

ZF108

3xFlag

YPet

OCS term

AGTCTAGCTCAACAGAGCTTTTAACCCAAATTGGTACAATAGAATACAACCTTAGAT  
CATAATTCTCAAAGAAAGAGATTCCCTTAGCTATTCTATCTGCCACTCCATTTCCCTC  
TCGGCTTGTATGCACAAGCATAAAATCCTCAAACCTTGCTAAGTAGATACTTTATGTC  
TTGGATAATTGGATTGAGACTTGACAAGCATAACTTTCATGTAACCAAAGACACAAG  
TTGCTGAGAATCCACCTCAAAAATGATCTTCTATAATTGAATCGGGATAATGACAG  
CACAGCCCATCTAAGAGCCTCCACTTCTACTTCCAGCACGCTTCTTACTTTTACCAC  
AGCTCTTGCACCTAACATAACACCTTCCCTGTATGATCGCGAAGCACCCACCCTA  
AGCCACATTTAATCCTTCTGTTGGCCATGCCCCATCAAAGTTGCACTTAACCCAAG  
ATTGTGGTGGAGCTTCCCATGTTTCTCGTCTGTCCCGACGGTGTGTTGGTTGGTGC  
TTTCCCTTACATTCTGAGCCTCTTCCCTTCTAATCCACTCATCTGCATCTTCTTGTGTC  
CTTACTAATACCTCATTGGTTCCAAATTCCTCCCTTAAAGCACCGCTCGTTTCTG  
TTCTTCCACAGCCTCCCAAGTATCCAAGGGACTAAAGCCTCCACATTCTTACAGATC  
AGGATATTCTTGTTTAAGATGTTGAACTCTATGGAGGTTTGTATGAACTGATGATCT  
AGGACCGGATAAGTTCCCTTCTTCATAGCGAACTTATTCAAAGAATGTTTTGTGAT  
CATTCTTGTTACATTGTTATTAATGAAAAAATATTATTGGTCATTGGACTGAACACGA  
GTGTTAAATATGGACCAGGCCCAAATAAGATCCATTGATATATGAATTAATAACA  
AGAATAAATCGAGTCACCAAACCACTTGCCTTTTTAAACGAGACTTGTTACCAACT  
TGATACAAAAGTCATTATCCTATGCAAATCAATAATCATACAAAATATCCAATAACA

CTAAAAAATTAAGAAATGGATAATTTACAATATGTTATACGATAAAGAAGTACT  
TTTCCAAGAAATCACTGATTTTATAAGCCACTTGCATTAGATAAATGGCAAAAA  
AAACAAAAGGAAAAGAAATAAAGCACGAAGAATTCTAGAAAATACGAAATACGCTT  
CAATGCAGTGGGACCCACGGTTCAATTATTGCCAATTTTCAGCTCCACCGTATATTT  
AAAAATAAAACGATAATGCTAAAAAATAAAATCGTAACGATCGTTAAATCTCAAC  
GGCTGGATCTTATGACGACCGTTAGAAATTGTGGTTGTCGACGAGTCAGTAATAAA  
CGGCGTCAAAGTGGTTGCAGCCGGCACACACGAGTCGTGTTTATCAACTCAAAGC  
ACAAATACTTTTCTCAACCTAAAAATAAGGCAATTAGCCAAAAACAACCTTTCGCGT  
TAAACAACGCTCAATACACGTGTCATTTTATTATTAGCTATTGCTTACCAGCCTTAG  
CTTTCTCGTGACCTAGTCGTCCTCGTCTTTTCTTCTTCTTCTTATAAAACAATACC  
CAAAGAGCTCTTCTTCTTCACAATTCAGATTTCAATTTCTCAAATCTTAAAACTTT  
CTCTCAATTCTCTTACCCTGATCAAGGTAATTTCTGTGTTCTTATTCTCTCAAAA  
TCTTCGATTTTGTTCGTTTCGATCCCAATTTCTGATATGTTCTTTGGTTTAGATTCT  
GTTAATCTTAGATCGAAGACGATTTTCTGGGTTTGATCGTTAGATATCATCTTAATTC  
TCGATTAGGGTTTCATAGATATCATCCGATTTGTTCAAATAATTTGAGTTTTGTGCA  
TAATTACTCTTCGATTTGTGATTTCTATCTAGATCTGGTGTAGTTTCTAGTTTGTGC  
GATCGAATTTGTGATTAATCTGAGTTTTTCTGATTAACAGACGCGTCCATGGTTGG  
GTACCAACAAATGGCTGGTGGACTTAACGATATCTTCGAAGCTCAGAAGATTGAAT  
GGCATGAGGATACTGGTGATCTAGCATCCCCGGACTTGAGGTTCTTTTCCAAGG  
ACCTCTCGAGCCTTATAAATGCCCTGAGTGTGGAAAATCTTTCTCTCAATCTGGAG  
ATCTTAGGAGGCACCAAAGGACCCATACCGGTGAAAAACCTTATAAATGCCCTGAG  
TGTGAAAATCATTAGTAGGAGTGATCATCTTACCACCCATCAGAGGACCCATAC  
TGGTAAAAACCTTATAAATGCCCTGAGTGTGGAAAATCATTCTCACAATCTTCATC  
TCTTGTTAGGCATCAGAGGACTCATACCGGAGAAAAACCTTATAAATGCCCTGAGT  
GTGGAAAATCATTCTCAACATCTGGAAACCTTGTTAGGCACCAAAGGACCCATACT  
GGTAAAAACCTTATAAATGCCCTGAGTGTGGAAAATCATTCTCTCAGAGAGCAAA  
CCTTAGGGCTCATCAAAGGACACACACTGGAGAAAAACCTTATAAATGCCCTGAGT  
GTGGAAAATCTTTCTCTAGGAGTGATAAGCTCACCGAGCATCAAAGGACTCACACC  
GGACTCGAGGACTACAAAGACGATGACGACAAAGACTACAAAGACGATGACGACA  
AAGACTACAAAGACGATGACGACAAAAAGCTTGATATCGCCATGGGGGGCGCGCC  
AAGCTATCAAACAAGTTTGTACAAAAAGCAGGCTCCGCGGCCGCCCCCTTACC  
CTAGACCCTTTGCCTGCTGCTGCTGCCGCTGTGAGCAAAGGCGAAGAGCTGTTCA  
CCGGCGTGGTGCCCATCCTGGTGGAGCTGGACGGCGACGTGAACGGCCACAAGT  
TCAGCGTGAGCGGCGAGGGCGAGGGCGACGCCACCTACGGCAAGCTGACCCTGA  
AGCTGCTGTGCACCACCGGCAAGCTGCCCGTGCCCTGGCCCACCCTGGTGACCA  
CCCTGGGCTACGGCGTGACGTGCTTCGCCCGGTACCCCGACCACATGAAGCAGC  
ACGACTTCTTCAAGAGCGCCATGCCCGAGGGCTACGTGCAGGAGCGGACCATCTT  
CTTCAAGGACGACGGCAACTACAAGACCCGGGCCGAGGTGAAGTTCGAGGGCGA  
CACCTGGTGAACCGGATCGAGCTGAAGGGCATCGACTTCAAGGAGGACGGCAA  
CATCCTGGGCCACAAGCTGGAGTACAACACTACAACAGCCACAACGTGTACATCACC  
GCCGACAAGCAGAAGAACGGCATCAAGGCCAACTTCAAGATCCGGCACAACATCG  
AGGACGGCGGCGTGACGCTGGCCGACCACTACCAGCAGAACACCCCATCGGCG  
ACGGCCCCGTGCTGCTGCCCGACAACCACTACCTGAGCTACCAGAGCGCCCTGTT  
CAAGGACCCCAACGAGAAGCGGGACCATGGTGTGCTGCTGGAGTTCCTGACCGC  
CGCCGGCATCACCGAGGGCATGAACGAGCTCTATAATTAGAAGGGTGGGGCGCGC  
CGACCCAGCTTTCTTGTACAAAGTGGTTTCGATAATTCCTTAATTAAGTCTAGA

GCGGCCGCCACCGCGGTGGAGCTCCTAGGTGAGTCTAGAGAGTTAATTAAGACCC  
GGGACTAGTCCCTAGAGTCCTGCTTTAATGAGATATGCGAGACGCCTATGATCGCA  
TGATATTTGCTTTCAATTCTGTTGTGCACGTTGTAACCACTGAGCATGTGTAGCT  
CAGATCCTTACCGCCGGTTTCGGTTCATTCTAATGAATATATCACCCGTTACTATCG  
TATTTTTATGAATAATATTCTCCGTTCAATTTACTGATTGTACCCTACTACTTATATGT  
ACAATATTAATAATGAAAACAATATATTGTGCTGAATAGGTTTATAGCGACATCTATGA  
TAGAGCGCCACAATAACAAACAATTGCGTTTTATTATTACAAATCCAATTTTAAAAAA  
AGCGGCAGAACCGGTCAAACCTAAAAGACTGATTACATAAATCTTATTCAAATTTCA  
AAAGTGCCCCAGGGGCTAGTATCTACGACACACCGAGCGGCGAATAAAGCCT  
CACTGAAGGGAACCTCCGGTTCCTCCGCGCGCATGGGTGAGATTCCTTGAAGT  
TGAGTATTGGCCGTCCGCTCTACCGAAAGTTACGGGCACCATTCAACCCGGTCCA  
GCACGGCGGCGGGTAACCGACTTGCTGCCCGAGAATTATGCAGCATTTTTTTTG  
GTGTATGTGGGCCCAAATGAAGTGCAGGTCAAACCTTGACAGTGACGACAAATC  
GTTGGGCGGGTCCAGGGCGAATTTTGCACGAGCT

**pUBQ10::ZF1CACTA1\_3xFlag\_TET1cd**

pUBQ10

ZF1CACTA1

3xFlag

TET1cd

OCS term

AGTCTAGCTCAACAGAGCTTTTAACCCAAATTGGTACAATAGAATACAACCTTTAGAT  
CATAATTCTCAAAGAAAGAGATTCCCTTAGCTATTCTATCTGCCACTCCATTTCCCTC  
TCGGCTTGATGCACAAGCATAAAATCCTCAAACCTTGCTAAGTAGATACTTTATGTC  
TTGGATAATTGGATTGAGACTTGACAAGCATAACTTTCATGTAACCAAAGACACAAG  
TTGCTGAGAATCCACCTCAAAAATGATCTTCTATAATTGAATCGGGATAATGACAG  
CACAGCCCATCTAAGAGCCTCCACTTCTACTTCCAGCACGCTTCTTACTTTTACCAC  
AGCTCTTGCACCTAACATAACACCTTCCCTGTATGATCGCGAAGCACCCACCCTA  
AGCCACATTTAATCCTTCTGTTGGCCATGCCCATCAAAGTTGCACTTAACCCAAG  
ATTGTGGTGGAGCTTCCCATGTTTCTCGTCTGTCCCGACGGTGTGTTGGTTGGTGC  
TTTCTTACATTCTGAGCCTCTTCCCTTCTAATCCACTCATCTGCATCTTCTTGTGTC  
CTTACTAATACCTCATTGGTTCCAAATTCCTCCCTTTAAGCACAGCTCGTTTCTG  
TTCTTCCACAGCCTCCCAAGTATCCAAGGGACTAAAGCCTCCACATTCTTCAAGATC  
AGGATATTCTTGTTAAGATGTTGAACTCTATGGAGGTTTGTATGAACTGATGATCT  
AGGACCGGATAAGTTCCTTCTTCATAGCGAACTTATTCAAAGAATGTTTTGTGTAT  
CATTCTTGTTACATTGTTATTAATGAAAAAATATTATTGGTCATTGGACTGAACACGA  
GTGTTAAATATGGACCAGGCCCAAATAAGATCCATTGATATATGAATTAATAACA  
AGAATAAATCGAGTCACCAAACCACTTGCTTTTTAACGAGACTTGTTCACTCACT  
TGATACAAAAGTCATTATCCTATGCAAATCAATAATCATACAAAAATATCCAATAACA  
CTAAAAAATTAAGAAATGGATAATTTACAATATGTTATACGATAAAGAAGTTACT  
TTTCCAAGAAATTCCTGATTTTATAAGCCACTTGCAATTAGATAAATGGCAAAAAA  
AAACAAAAAGGAAAAGAAATAAAGCACGAAGAATTCTAGAAAATACGAAATACGCTT  
CAATGCAGTGGGACCCACGGTCAATTATTGCCAATTTTCACTCCACCGTATATTT  
AAAAAATAAACGATAATGCTAAAAAATAAATCGTAACGATCGTTAAATCTCAAC  
GGCTGGATCTTATGACGACCGTTAGAAATTGTGGTTGTGCGACGAGTCAGTAATAAA

CGGCGTCAAAGTGGTTGCAGCCGGCACACACGAGTCGTGTTTATCAACTCAAAGC  
ACAAATACTTTTCTCAACCTAAAAATAAGGCAATTAGCCAAAAACAACCTTGCGTG  
TAAACAACGCTCAATACACGTGTCATTTTATTATTAGCTATTGCTTCACCGCCTTAG  
CTTTCTCGTGACCTAGTCGTCCTCGTCTTTTCTTCTTCTTCTTCTATAAAAAAATACC  
CAAAGAGCTCTTCTTCTTCACAATTCAGATTTCAATTTCTCAAAATCTTAAAACTTT  
CTCTCAATTCTCTTACCGTGATCAAGGTAATTTCTGTGTTCTTATTCTCTCAAAA  
TCTTCGATTTTGTTCGTTTCGATCCCAATTTTCGTATATGTTCTTTGGTTTAGATTCT  
GTTAATCTTAGATCGAAGACGATTTTCTGGGTTTGATCGTTAGATATCATCTTAATTC  
TCGATTAGGGTTTCATAGATATCATCCGATTTGTTCAAATAATTTGAGTTTTGTGCGAA  
TAATTACTCTTCGATTTGTGATTTCTATCTAGATCTGGTGTAGTTTCTAGTTTGTGC  
GATCGAATTTGTGCGATTAATCTGAGTTTTTCTGATTAACAGATGGTT GAG AAA CCT  
TAC AAG TGC CCG GAG TGC GGA AAG TCT TTT TCA CAA AAC TCA ACC TTG  
ACG GAG CAT CAG CGA ACA CAT ACC GGG GAA AAG CCG TAT AAG TGT CCG  
GAA TGC GGG AAA TCT TTT TCT AGG TCT GAT AAC TTG GTG AGA CAC CAG  
CGT ACA CAC ACA GGT GAA AAG CCT TAC AAG TGC CCA GAA TGC GGA AAG  
AGC TTC AGC ACC ACC GGC AAT CTG ACC GTA CAT CAG CGA ACT CAT ACA  
GGT GAG AAA CCC TAT AAG TGT CCT GAG TGC GGA AAA TCT TTC AGC CAA  
TCA TCA AAT TTA GTG AGA CAT CAG AGG ACC CAC ACA GGG GAG AAG CCG  
TAT AAA TGT CCC GAG TGT GGG AAA AGT TTC TCT CGA TCC GAT AAC CTG  
GTA CGA CAT CAG CGA ACC CAT ACT GGT GAG AAG CCC TAT AAA TGC CCT  
GAA TGC GGC AAA TCC TTT TCC ACG TCC GGG AGC CTA GTT AGG CAT CAA  
CGA ACC CAT ACC GGT

AACCGCGCCAAGCTTGGTACCGACTACAAAGACGATGACGACAAAGACTACAAAG  
ACGATGACGACAAAGACTACAAAGACGATGACGACAAAGGATCCCTTGAGGTTCTT  
TTCGGCGCGCCAAGCTATCAACAAGTTTGACAAAAAAGCAGGCTCCGCGGCCG  
CCCCCTTACCATGGGATCCCTGCCACCTGCAGCTGTCTTGATCGAGTTATACAA  
AAAGACAAAGGCCCATATTATACACACCTTGGGGCAGGACCAAGTGTTGCTGCTGT  
CAGGGAAATCATGGAGAATAGGTATGGTCAAAAAGGAAACGCAATAAGGATAGAAA  
TAGTAGTGTACACCGGTAAGAAGGGAAAAGCTCTCATGGGTGTCCAATTGCTAAG  
TGGTTTTAAGAAGAAGCAGTGATGAAGAAAAGTTCTTTGTTTGGTCCGGCAGCG  
TACAGGCCACCACTGTCCAAGTGTGATGGTGGTGTCTCATCATGGTGTGGGAT  
GGCATCCCTCTTCCAATGGCCGACCGGCTATACACAGAGCTCACAGAGAATCTAA  
AGTCATACAATGGGCACCCTACCGACAGAAGATGCACCCTCAATGAAAATCGTACC  
TGTACATGTCAAGGAATTGATCCAGAGACTTGTGGAGCTTCATTCTCTTTTGGCTGT  
TCATGGAGTATGTACTTTAATGGCTGTAAGTTTGGTAGAAGCCCAAGCCCCAGAAG  
ATTTAGAATTGATCCAAGCTCTCCCTTACATGAAAAAACCTTGAAGATAACTTACA  
GAGTTTGGCTACACGATTAGCTCCAATTTATAAGCAGTATGCTCCAGTAGCTTACC  
AAAATCAGGTGGAATATGAAAATGTTGCCCGAGAATGTCGGCTTGGCAGCAAGGA  
AGGTCGACCCTTCTCTGGGGTCACTGCTTGCCTGGACTTCTGTGCTCATCCCCACA  
GGGACATTCACAACATGAATAATGGAAGCACTGTGGTTTGTACCTTAACTCGAGAA  
GATAACCGCTCTTTGGGTGTTATTCCTCAAGATGAGCAGCTCCATGTGCTACCTCT  
TTATAAGCTTTTACAGACACAGATGAGTTTGGCTCCAAGGAAGGAATGGAAGCCAAGA  
TCAAATCTGGGGCCATCGAGGTCCTGGCACCCCGCCGCAAAAAAAGAACGTGTTT  
CACTCAGCCTGTTCCCCGTTCTGGAAAGAAGAGGGCTGCGATGATGACAGAGGTT  
CTTGACATAAGATAAGGGCAGTGGAAAAGAAACCTATTCCCCGAATCAAGCGGAA  
GAATAACTCAACAACAACAACAACAGTAAGCCTTCGTCACTGCCAACCTTAGGGA

GTAACACTGAGACCGTGCAACCTGAAGTAAAAAGTGAAACCGAACCCCATTTTATC  
TTAAAAAGTTCAGACAACACTAAAACCTATTTCGCTGATGCCATCCGCTCCTCACCCA  
GTGAAAGAGGCATCTCCAGGCTTCTCCTGGTCCCCGAAGACTGCTTCAGCCACAC  
CAGCTCCACTGAAGAATGACGCAACAGCCTCATGCGGGTTTTTCAGAAAGAAGCAG  
CACTCCCCACTGTACGATGCCTTCGGGAAGACTCAGTGGTGCCAATGCTGCAGCT  
GCTGATGGCCCTGGCATTTCACAGCTTGGCGAAGTGGCTCCTCTCCCCACCCTGT  
CTGCTCCTGTGATGGAGCCCCTCATTAAATTCTGAGCCTTCCACTGGTGTGACTGAG  
CCGCTAACGCCTCATCAGCCAAACCACCAGCCCTCCTTCCCTCACCTCTCCTCAAGA  
CCTTGCCTCTTCTCCAATGGAAGAAGATGAGCAGCATTCTGAAGCAGATGAGCCTC  
CATCAGACGAACCCCTATCTGATGACCCCTGTCACCTGCTGAGGAGAAATTGCC  
CCACATTGATGAGTATTGGTCAGACAGTGAGCACATCTTTTTGGATGCAAATATTG  
GTGGGGTGGCCATCGCACCTGCTCACGGCTCGGTTTTGATTGAGTGTGCCCGGC  
GAGAGCTGCACGCTACCACTCCTGTTGAGCACCCCAACCGTAATCATCCAACCCG  
CCTCTCCCTTGTCTTTTACCAGCACAAAAACCTAAATAAGCCCCAACATGGTTTTGA  
ACTAAACAAGATTAAGTTTGAGGCTAAAGAAGCTAAGAATAAGAAAATGAAGGCCT  
CAGAGCAAAAAGACCAGGCAGCTAATGAAGGTCCAGAACAGTCCTCTGAAGTAAA  
TGAATTGAACCAAATTCCTTCTCATAAAGCATTAAACATTAACCCATGACAATGTTGT  
CACCGTGTCCCCTTATGCTCTCACACACGTTGCGGGGCCCTATAACCATTGGGTCT  
GAAAGGGTGGGCGCGCCGACCCAGCTTTCTTGTACAAAGTGGTTCGATAATTCTTA  
ATTAAGTCTAGAGCGGCCGCCACCGCGGTGGAGCTCCTAGGTGAGTCTAGA  
GAGTTAATTAAGACCCGGGACTAGTCCCTAGAGTCCTGCTTTAATGAGATATGCGA  
GACGCCTATGATCGCATGATATTTGCTTTCAATTCTGTTGTGCACGTTGTA AAAAAC  
CTGAGCATGTGTAGCTCAGATCCTTACCGCCGGTTTCGGTTCATTCTAATGAATATA  
TCACCCGTTACTATCGTATTTTTATGAATAATATTCTCCGTTCAATTTACTGATTGTA  
CCCTACTACTTATATGTACAATATTA AAAATGAAAACAATATATTGTGCTGAATAGGTT  
TATAGCGACATCTATGATAGAGCGCCACAATAACAAACAATTGCGTTTTATTATTAC  
AAATCCAATTTTAAAAAAGCGGCAGAACCGGTCAAACCTAAAAGACTGATTACATA  
AATCTTATTCAAATTTCAAAGTGCCCCAGGGGCTAGTATCTACGACACACCGAGC  
GGCGAACTAATAACGCTCACTGAAGGGA ACTCCGGTTC CCGCGCGGCATG  
GGTGAGATTCCTTGAAGTTGAGTATTGGCCGTCCGCTCTACCGAAAGTTACGGGC  
ACCATTCAACCCGGTCCAGCACGGCGGGGTAACCGACTTGCTGCCCCGAGA  
ATTATGCAGCATTTTTTTGGTGTATGTGGGCCCAAATGAAGTGCAGGTCAAACCT  
TGACAGTGACGACAAATCGTTGGGCGGGTCCAGGGCGAATTTTGCACGAGCT

**pUBQ10::ZF2CACTA1\_3xFlag\_TET1cd**

pUBQ10  
ZF2CACTA1  
3xFlag  
TET1cd  
OCS term

AGTCTAGCTCAACAGAGCTTTTAACCCAAATTGGTACAATAGAATACA ACTTTAGAT  
CATAATTCTCAAAGAAAGAGATTCTTAGCTATTCTATCTGCCACTCCATTTCCCTC  
TCGGCTTGATGCACAAGCATAAAAATCCTCAAACCTGCTAAGTAGATACTTTATGTC

TTGGATAATTGGATTGAGACTTGACAAGCATAACTTTTCATGTAACCAAAGACACAAG  
TTGCTGAGAATCCACCTCAAAAATGATCTTCTATAATTGAATCGGGATAATGACAG  
CACAGCCCATCTAAGAGCCTCCACTTCTACTTCCAGCACGCTTCTTACTTTTACCAC  
AGCTCTTGACCTAACCATACACCTTCCCTGTATGATCGCGAAGCACCCACCCTA  
AGCCACATTTAATCCTTCTGTTGGCCATGCCCATCAAAGTTGCACTTAACCCAAG  
ATTGTGGTGGAGCTTCCCATGTTTCTCGTCTGTCCCGACGGTGTGTGGTTGGTGC  
TTTCTTACATTCTGAGCCTCTTCTTCTAATCCACTCATCTGCATCTTCTTGTGTC  
CTTACTAATACCTCATTGGTTCCAAATTCCTCCCTTAAAGCACCAGCTCGTTTCTG  
TTCTTCCACAGCCTCCCAAGTATCCAAGGGACTAAAGCCTCCACATTCTTCAGATC  
AGGATATTCTTGTTAAGATGTTGAACTCTATGGAGGTTTGTATGAACTGATGATCT  
AGGACCGGATAAGTTCCCTTCTCATAGCGAACTTATTCAAAGAATGTTTTGTGTAT  
CATTCTTGTTACATTGTTATTAATGAAAAAATATTATTGGTCATTGGACTGAACACGA  
GTGTTAAATATGGACCAGGCCCAAATAAGATCCATTGATATATGAATTAATAACA  
AGAATAAATCGAGTCACCAAACCACTTGCCTTTTTTAACGAGACTTGTTACCAACT  
TGATACAAAAGTCATTATCCTATGCAAATCAATAATCATACAAAAATATCCAATAACA  
CTAAAAAATTAAGAAATGGATAATTCACAATATGTTATACGATAAAGAAGTTACT  
TTTCCAAGAAATTCCTGATTTTATAAGCCCCTTGCATTAGATAAATGGCAAAAAA  
AAACAAAAGGAAAAGAAATAAAGCACGAAGAATTCTAGAAAATACGAAATACGCTT  
CAATGCAGTGGGACCCACGGTTCAATTATTGCCAATTTTCAGCTCCACCGTATATT  
AAAAAATAAACGATAATGCTAAAAAATAAATCGTAACGATCGTTAAATCTCAAC  
GGCTGGATCTTATGACGACCGTTAGAAATTGTGGTTGTCGACGAGTCAGTAATAAA  
CGGCGTCAAAGTGGTTGCAGCCGGCACACACGAGTCGTGTTTATCAACTCAAAGC  
ACAAATACTTTTCTCAACCTAAAAATAAGGCAATTAGCCAAAAACAACCTTTGCGTG  
TAAACAACGCTCAATACACGTGTCATTTTATTATTAGCTATTGCTTCACCGCCTTAG  
CTTCTCGTGACCTAGTCGTCCTCGTCTTTTCTTCTTCTTCTATAAAAACAATACC  
CAAAGAGCTCTTCTTCTTCACAATTCAGATTTCAATTTCTCAAATCTTAAAAACTTT  
CTCTCAATTCTCTACCGTGATCAAGGTAATTTCTGTGTTCTTATTCTCTCAAAA  
TCTTCGATTTTGTTCGTTTCGATCCCAATTTCTGATATGTTCTTTGGTTTAGATTCT  
GTTAATCTTAGATCGAAGACGATTTTCTGGGTTTATCGTTAGATATCATCTTAATTC  
TCGATTAGGGTTTCATAGATATCATCCGATTTGTTCAAATAATTTGAGTTTTGTGAA  
TAATTACTCTTCGATTTGTGATTTCTATCTAGATCTGGTGTAGTTTCTAGTTTGTGC  
GATCGAATTTGTGATTAATCTGAGTTTTTCTGATTAACGATGGTT GAG AAG CCC  
TAT AAG TGC CCC GAG TGT GGG AAG TCT TTC AGC AGG GAA GAT AAC CTC  
CAC ACT CAT CAA AGA ACG CAT ACG GGA GAA AAG CCT TAC AAA TGT CCG  
GAA TGT GGG AAA TCA TTC AGC CAA TCA AGC AAT CTC GTG AGA CAT CAA  
CGT ACA CAT ACA GGG GAA AAA CCA TAT AAG TGC CCC GAA TGC GGT AAG  
TCA TTT TCA CAC CGT ACT ACT CTG ACA AAC CAT CAA CGT ACC CAT ACT  
GGG GAG AAG CCT TAT AAA TGT CCT GAG TGT GGG AAG AGC TTC TCT CAG  
AGG GCG CAT TTG GAG CGT CAC CAG AGG ACA CAT ACC GGC GAA AAA CCG  
TAC AAA TGT CCT GAA TGT GGA AAG TCA TTC TCA CGT AGT GAC AAT CTC  
GTC AGG CAC CAG CGT ACT CAT ACT GGA GAG AAA CCC TAC AAG TGT CCT  
GAA TGT GGT AAG TCC TTC AGT CAA TCC TCC AGC CTA GTG AGA CAT CAA  
AGG ACG CAT ACC GGG

AACCGCGCCAAGCTTGGTACCGACTACAAAGACGATGACGACAAAGACTACAAAG  
ACGATGACGACAAAGACTACAAAGACGATGACGACAAAGGATCCCTTGAGGTTCTT  
TTCGGCGCGCCAAGCTATCAACAAGTTTGTACAAAAAAGCAGGCTCCGCGGCCG



CCCCCTTCACCATGGGATCCCTGCCACCTGCAGCTGTCTTGATCGAGTTATACAA  
AAAGACAAAGGCCCATATTATACACACCTTGGGGCAGGACCAAGTGTGCTGCTGT  
CAGGGAAATCATGGAGAATAGGTATGGTCAAAAAGGAAACGCAATAAGGATAGAAA  
TAGTAGTGTACACCGGTAAAGAAGGGAAAAGCTCTCATGGGTGTCCAATTGCTAAG  
TGGGTTTTAAGAAGAAGCAGTGATGAAGAAAAAGTTCTTTGTTTGGTCCGGCAGCG  
TACAGGCCACCACTGTCCAAGTGTGTGATGGTGGTGTGCTCATCATGGTGTGGGAT  
GGCATCCCTCTTCCAATGGCCGACCGGCTATACACAGAGCTCACAGAGAATCTAAA  
GTCATACAATGGGCACCCTACCGACAGAAGATGCACCCTCAATGAAAATCGTACCT  
GTACATGTCAAGGAATTGATCCAGAGACTTGTGGAGCTTCATTCTCTTTTGGCTGTT  
CATGGAGTATGTACTTTAATGGCTGTAAGTTTGGTAGAAGCCCAAGCCCCAGAAGA  
TTTAGAATTGATCCAAGCTCTCCCTTACATGAAAAAACCTTGAAGATAACTTACAG  
AGTTTGGCTACACGATTAGCTCCAATTTATAAGCAGTATGCTCCAGTAGCTTACCAA  
AATCAGGTGGAATATGAAAATGTTGCCCGAGAATGTCGGCTTGGCAGCAAGGAAG  
GTCGACCCTTCTCTGGGGTCACTGCTTGCCTGGACTTCTGTGCTCATCCCCACAG  
GGACATTCACAACATGAATAATGGAAGCACTGTGGTTTGTACCTTAACTCGAGAAG  
ATAACCGCTCTTTGGGTGTTATTCTCAAGATGAGCAGCTCCATGTGCTACCTCTTT  
ATAAGCTTTCAGACACAGATGAGTTTGGCTCCAAGGAAGGAATGGAAGCCAAGATC  
AAATCTGGGGCCATCGAGGTCCTGGCACCCCGCCGCAAAAAAGAACGTGTTTCA  
CTCAGCCTGTTCCCGTCTGGAAAGAAGAGGGCTGCGATGATGACAGAGGTTCT  
TGCACATAAGATAAGGGCAGTGGAAGAAGAAACCTATTCCCGAATCAAGCGGAAG  
AATAACTCAACAACAACAACAACAGTAAGCCTTCGTCACTGCCAACCTTAGGGAG  
TAACACTGAGACCGTGCAACCTGAAGTAAAAAGTGAAACCGAACCCCATTTTATCT  
TAAAAAGTTCAGACAACACTAAAACCTTATTCTGCTGATGCCATCCGCTCCTCACCCA  
GTGAAAGAGGCATCTCCAGGCTTCTCCTGGTCCCGAAGACTGCTTCAGCCACAC  
CAGCTCCACTGAAGAATGACGCAACAGCCTCATGCGGGTTTTAGAAAAGAAGCAG  
CACTCCCCACTGTACGATGCCTTCGGGAAGACTCAGTGGTGCCAATGCTGCAGCT  
GCTGATGGCCCTGGCATTTCACAGCTTGGCGAAGTGGCTCCTCTCCCCACCCTGT  
CTGCTCCTGTGATGGAGCCCTCATTAACTTCTGAGCCTTCCACTGGTGTGACTGAG  
CCGCTAACGCCTCATCAGCCAAACCACAGCCCTCCTTCTCACCTCTCCTCAAGA  
CCTTGCCTCTTCTCCAATGGAAGAAGATGAGCAGCATTCTGAAGCAGATGAGCCTC  
CATCAGACGAACCCCTATCTGATGACCCCTGTCACCTGCTGAGGAGAAATTGCC  
CCACATTGATGAGTATTGGTCAGACAGTGAGCACATCTTTTTGGATGCAAATATTG  
GTGGGGTGGCCATCGCACCTGCTCACGGCTCGGTTTTGATTGAGTGTGCCCGGC  
GAGAGCTGCACGCTACCACTCCTGTTGAGCACCCCAACCGTAATCATCCAACCCG  
CCTCTCCCTTGTCTTTTACCAGCACAAAACCTAAATAAGCCCAACATGGTTTTGA  
ACTAAACAAGATTAAGTTTGAAGGCTAAAGAAGCTAAGAATAAGAAAATGAAGGCCT  
CAGAGCAAAAAGACCAGGCAGCTAATGAAGGTCCAGAACAGTCCTCTGAAGTAAAT  
GAATTGAACCAAATTCCTTCTCATAAAGCATTAACTAACCCATGACAATGTTGTC  
ACCGTGTCCCTTATGCTCTCACACACGTTGCGGGGCCCTATAACCATTGGGTCTG  
AAAGGGTGGGCGCGCCGACCCAGCTTTCTTGTACAAAGTGGTTCGATAATTCTTAA  
TTAACTAGTTCTAGAGCGGCCGCCACCGCGGTGGAGCTCTAGGTGAGTCTAGAG  
AGTTAATTAAGACCCGGGACTAGTCCCTAGAGTCTGCTTTAATGAGATATGCGAG  
ACGCCTATGATCGCATGATATTTGCTTTCAATTCTGTTGTGCACGTTGTAAAAAACC  
TGAGCATGTGTAGCTCAGATCCTTACCGCCGGTTTCGGTTCATTCTAATGAATATAT  
CACCCGTTACTATCGTATTTTTATGAATAATATTCTCCGTTCAATTTACTGATTGTAC  
CCTACTACTTATATGTACAATATTAATAATGAAAACAATATATTGTGCTGAATAGGTTT

ATAGCGACATCTATGATAGAGCGCCACAATAACAAACAATTGCGTTTTATTATTACA  
AATCCAATTTTAAAAAAGCGGCAGAACCGGTCAAACCTAAAAGACTGATTACATAA  
ATCTTATTCAAATTTCAAAAGTGCCCCAGGGGCTAGTATCTACGACACACCGAGCG  
GCGAACTAATAACGCTCACTGAAGGGA ACTCCGGTTC CCGCGCGGCGCGCATGG  
GTGAGATTCTTGAAGTTGAGTATTGGCCGTCCGCTCTACCGAAAGTTACGGGCAC  
CATTCAACCCGGTCCAGCACGGCGGGGTAACCGACTTGCTGCCCCGAGAATT  
ATGCAGCATT TTTTGGTGTATGTGGGCCCAATGAAGTGCAGGTCAAACCTTGA  
CAGTGACGACAAATCGTTGGGCGGGTCCAGGGCGAATTTTGCAGAGCT

**SunTagFWAg4-22aa-TET1cd**

**gRNA FWAg4**

**U6**

**NOS term**

**TET1cd**

**2xNLS**

**Linker**

**1xHA**

**sfGFP**

**scFV**

**UBQ10**

**Insulator**

**Omega RBC**

**dCAS9**

**3xNLS**

**GCN4 10x 22aa**

**OCS term**

AAAAAAGCACCGACTCGGTGCCACTTTTTCAAGTTGATAACGGACTAGCCTTATTT  
TAACTTGCTATTTCTAGCTCTAAAACAAGCCCATACATCTTCCGTCAATCACTACTI  
CGACTCTAGCTGTATATAAACTCAGCTTCGTTTTCTTATCTAAGCGATGTGGGACTT  
TTGAAGATTGTTTTCAACTTAAATGGGCCTATATAAGAAATACTATTGTTCTTTCCCA  
TATAAATGGGCTGCTTCTCTTTT CAGATTCCCAGGGGCCTTTTGAAGATTATCT  
TCATATCTTAAGAATGAAGATGTTTTATTCAATCAAATCCTTGAAGGTTTCGATGCCTA  
ATCATTCTAATCCTGGGACAACTATGAAACAAGATACAAAACTCCGAATGGAAA  
GTTAAAAAGAAGAAAACGAAAGCTACGGTTCAAGAAAATGTAAGCTGATAAACAAA  
AAAAA ACTGTATGAACGAAGAAGAAGAAAAAAGCTAAGAAGAAATGATGTATTGT  
GCGGAAGGCAAGTCGAGTTTCCGTTGTTCAACGAAAGCTTAAACGTAACATAGATG  
ACACCGCGCGGATAATTTATCCTAGTTTGC GCGCTATATTTGTTTTCTATCGCGT  
ATTAATGTATAATTGCGGGACTCTAATCATAAAAACCCATCTCATAAATAACGTCA  
TGCATTACATGTTAATTATTACATGCTTAACGTAATTCAACAGAAATTATATGATAAT  
CATCGCAAGACCGGCAACAGGATTCAATCTTAAGAACTTTATTGCCAAATGTTTGA  
ACGATCGGGGAAATTGAGCTCAA ACTTACGGCCATGGCGTAGGCGGCCTTTTCC  
GTTGTGATCTTTCGCGGTCTCCTCCTTGT TTTTGGACTAGTACCACCACCGCTACCA  
CCACCTTCGGTTACCGTGAAGGTTTTGGTAGCGTTCGTCGTAGGTCCATTCACCGTC  
AACACCGTTGTCGTTAGCGTACTGTTTGAAA ACTTTTTCCGCGGTAGCAGCGTCAA  
CAGCTTCGGTGGTGGTTTACCTTT CAGGGTTTTACCGTTCAGGATAAGCTTGTAC

TCTTCGGTCCGAGATCCTCCTCCCGTACGTCAGACCCAATGGTTATAGGGCCCCG  
CAACGTGTGTGAGAGCATAAGGGGACACGGTGACAACATTGTCATGGGTTAATGT  
TAATGCTTTATGAGAAGGAATTTGGTTCAATTCATTTACTTCAGAGGACTGTTCTGG  
ACCTTCATTAGCTGCCTGGTCTTTTTGCTCTGAGGCCTTCATTTTCTTATTCTTAGCT  
TCTTTAGCCTCAAACCTAATCTTGTTAGTTCAAACCATGTTGGGGCTTATTTAGGT  
TTTTGTGCTGGTAAAAGACAAGGGAGAGGCGGGTTGGATGATTACGGTTGGGGTG  
CTCAACAGGAGTGGTAGCGTGACAGCTCTCGCCGGGCACACTCAATCAAACCGAG  
CCGTGAGCAGGTGCGATGGCCACCCACCAATATTTGCATCCAAAAGATGTGCT  
CACTGTCTGACCAATACTCATCAATGTGGGGCAATTTCTCCTCAGCAGGTGACAGG  
GGGTCATCAGATAGGGGTTTCGTCTGATGGAGGCTCATCTGCTTCAGAATGCTGCT  
CATCTTCTTCCATTGGAGAAGAGGCAAGGTCTTGAGGAGAGGTGAGGAAGGAGGG  
CTGGTGGTTTGGCTGATGAGGCGTTAGCGGCTCAGTCACACCAAGTGGAAGGCTCA  
GAATTAATGAGGGGCTCCATCACAGGAGCAGACAGGGTGGGGAGAGGAGCCACT  
TCGCCAAGCTGTGAAATGCCAGGGCCATCAGCAGCTGCAGCATTGGCACCCTGA  
GTCTTCCCGAAGGCATCGTACAGTGGGGAGTGTGCTTCTTTCTGAAAACCCGCAT  
GAGGCTGTTGCGTCATTCTTCAGTGGAGCTGGTGTGGCTGAAGCAGTCTTCGGGG  
ACCAGGAGAAGCCTGGAGATGCCTCTTTCCTGGGTGAGGAGCGGATGGCATCA  
GCGAATAAGTTTTAGTGTGTGCTGAACTTTTTAAGATAAAAATGGGGTTCGGTTTAC  
TTTTACTTCAGGTTGCACGGTCTCAGTGTTACTCCCTAAGGTTGGCAGTGACGAA  
GGCTTACTGTTGTTTGTGTTGTTGAGTTATTCTTCCGCTTGATTCCGGGAATAGGT  
TTCTTTTCCACTGCCCTTATCTTATGTGCAAGAACCTCTGTCATCATCGCAGCCCTC  
TTCTTTCCAGAACGGGGAACAGGCTGAGTGAAACACGTTCTTTTTTTGCGGGCGGG  
GTGCCAGGACCTCGATGGCCCCAGATTTGATCTTGGCTTCCATTCTTCTTGGAG  
CCAACTCATCTGTGTCTGAAAGCTTATAAAGAGGTAGCACATGGAGCTGCTCATC  
TTGAGGAATAACACCCAAAGAGCGGTTATCTTCTCGAGTTAAGGTACAAACCACAG  
TGCTTCCATTATTCATGTTGTGAATGTCCCTGTGGGGATGAGCACAGAAGTCCAGG  
CAAGCAGTGACCCAGAGAAGGGTCGACCTTCTTGGCTGCCAAGCCGACATTCTC  
GGGCAACATTTTCATATTCCACCTGATTTTGGTAAGCTACTGGAGCATACTGCTTAT  
AAATTGGAGCTAATCGTGTAGCCAACTCTGTAAGTTATCTTCAAGGTTTTTTTTCAT  
GTAAGGGAGAGCTTGGATCAATTCTAAATCTTCTGGGGCTTGGGCTTCTACCAAAC  
TTACAGCCATTAAGTACATACTCCATGAACAGCCAAAAGAGAATGAAGCTCCACA  
AGTCTCTGGATCAATTCCTTGACATGTACAGGTACGATTTTCATTGAGGGTGCATCT  
TCTGTCCGTAGGGTGCCCATTTGATGACTTTAGATTCTCTGTGAGCTCTGTGTATA  
GCCGGTCCGCCATTGGAAGAGGGATGCCATCCCACACCATGATGAGCACCACCAT  
CACAGCAGTTGGACAGTGGTGGCCTGTACGCTGCCGGACCAAACAAGAAGTCTTT  
TCTTCATCACTGCTTCTTCTTAAACCCACTTAGCAATTGGACACCCATGAGAGCTT  
TTCCCTTCTTACCGGTGTACACTACTATTTCTATCCTTATTGCGTTTCTTTTTGAC  
CATACCTATTCTCCATGATTTCCCTGACAGCAGCAACACTTGGTCTTCCCCAAGG  
TGTGTATAATATGGGCCTTTGTCTTTTTGTATAACTCGATCAAGACAGCTGCAGGTG  
GGCAGCCGGATCCGCCACCGCCACTTTCCGCTTTTTCTTAGGAGCTTCCACCTT  
GCGTTTTTCTTGGGAGCGCCGCTGCCAGGCTGGCATAATCGGGCACGTCATAG  
GGATACGTACGACCGGTCCGACCTCCACCCTTGTAGAGCTCATCCATGCCATGTGT  
AATCCCAGCAGCAGTTACAACTCAAGAAGGACCATGTGGTCACGCTTTTCGTTGG  
GATCTTTCGAAAGGACAGATTGTGTGACAGGTAATGGTTGTCTGGTAAAAGGACA  
GGGCCATCGCCAATTGGAGTATTTGTTGATAATGGTCTGCTAGTTGAACGGAACC  
ATCTTCAACGTTGTGGCGAATTTGAAGTTAGCTTGGATTCCATTCTTTGTTGTCT

GCCGTGATGTATACATTGTGTGAGTTAAAGTTGTA CTCTCGAGTTTGTGTCCAAGAAT  
GTTTCCATCTTCTTTAAAATCAATACCCTTTAACTCGATACGATTAACAAGGGTATCA  
CCTTCAAACCTTGACTTCAGCACGCGTCTTGTAGGTCCCCTCATCTTTGAAAGATATA  
GTGCGTTCTGTACATAACCTTCGGGCATGGCACTCTTGAAAAAGTCATGCCGTTT  
CATGTGATCCGGATAACGGGAAAAGCATTGAACACCATAGGTCAGAGTAGTGACA  
AGTGTGGCCACGGAACAGGTAGTTTTCCAGTAGTGCAAATAAATTTAAGGGTGAG  
TTTTCCGTTTGTAGCATCACCTTCACCCTCTCCACGGACAGAAAATTTGTGCCATT  
AACATCACCATCTAATTCAACAAGAATTGGGACAACCTCCAGTGAAAAGTTCTTCTCC  
TTTGCTACCGCTTCCACCTCCACCTGGATCCAAAGCTTCCGCCGCTCCTGAACCAC  
CACCGCCACTACCTCCTCCCCAGAACCTCCGCCTCCACCAGCGTAATCTGGAAC  
ATCGTATGGGTAGCTGCTCACGGTCACCAGGGTGCCCTGGCCCCAGTAGTCGAAC  
AGGCCGGTCACGCAGTAGTACAGGGCGGTGTCGTGCTGCGCACCTTGCTCATCT  
GCAGGTACACGGTGTCTTGCCGTTGTCCTTGCTGATGATGAAGCGGTCTTTCAG  
GGCGCTGTTGTAGTCGGTGATGCCGTGCCCCAGATCACGCCGATCCACTCCAGG  
CCGCGGCCGGGGGCTGGCGCACCCAGTTCACGCCGTAGTCGGTCAGGCTGAA  
GCCGCTCACGGCGCAGCTCAGCTTCAGGCTGCCGCCGGGCTGCACCAGGCCGCC  
GCCGCTCTCCAGCAGCTTCACCTCGCTGCCGCCGCCGCTGCTGCCGCCGCCGCC  
GCTGCCGCCGCCGCCGCTGCCGCCGCCGCCGCCGCTTCAGCTCCACCTTGGTGCC  
CTGGCCGAACACCCAGTGGTTGCTGTACCACAGGGCGCAGAAGTAGGTGGCGAA  
GTCCTCGGGCTGCAGGCTGCTGATGGTCAGGGTGCCCTTGTGCGCCGATCAGGCT  
GCCGCTGAAGCGGCTGGGCACGCCGGGGGCGCGGTTGTTGGTGCCGCCGATCA  
GGCCCTTGAACAGCTTGCCGGGCTTCTCCTGCACCAGCTGGCGTAGTTGCTGGT  
GGTCACGGCGCCGGTGCTGCTGCGGCAGGTGATGGTCACGCGGTCGCCACGCT  
GGCGCTCAGGCTGCTGGGGCTCTGGGTATCACGATGTCGGGGCCCATAAACCC  
TAGGTGTTAATCAGAAAACTCAGATTAATCGACAAATTCGATCGCACAAACTAGAA  
ACTAACACCAGATCTAGATAGAAATCACAAATCGAAGAGTAATTATTCGACAAAAC  
CAAATTATTTGAACAAATCGGATGATATCTATGAAACCCTAATCGAGAATTAAGATG  
ATATCTAACGATCAAACCCAGAAAATCGTCTTCGATCTAAGATTAACAGAATCTAAA  
CCAAAGAACATATACGAAATTGGGATCGAACGAAAACAAAATCGAAGATTTTGAGA  
GAATAAGGAACACAGAAATTTACCTTGATCACGGTAGAGAGAATTGAGAGAAAGTT  
TTTAAGATTTTGAGAAATTGAAATCTGAATTGTGAAGAAGAAGAGCTCTTTGGGTAT  
TGTTTTATAGAAGAAGAAGAAGAAAAGACGAGGACGACTAGGTCACGAGAAAGCTA  
AGGCGGTGAAGCAATAGCTAATAATAAAATGACACGTGATTGAGCGTTGTTTACA  
CGCAAAGTTGTTTTGGCTAATTGCCTATTTTTAGGTTGAGGAAAAGTATTTGTGC  
TTTGAGTTGATAAACACGACTCGTGTGTGCCGGCTGCAACCACTTTGACGCCGTTT  
ATTACTGACTCGTCGACAACCACAATTTCTAACGGTCGTCATAAGATCCAGCCGTT  
GAGATTTAACGATCGTTACGATTTATATTTTTTAGCATTATCGTTTTATTTTTAAAT  
ATACGGTGGAGCTGAAAATTGGCAATAATTGAACCGTGGGTCCCCTGCATTGAAG  
CGTATTTCTGATTTTCTAGAATTCTTCGTGCTTTATTTCTTTTCTTTTGTTTTTTT  
GCCATTTATCTAATGCAAGTGGGCTTATAAAATCAGTGAATTTCTTGAAAAGTAAC  
TTCTTTATCGTATAACATATTGTGAAATTATCCATTTCTTTAATTTTTTAGTGTTATT  
GGATATTTTTGTATGATTATTGATTGCATAGGATAATGACTTTTGATCAAGTTGGT  
GAACAAGTCTCGTTAAAAAAGGCAAGTGGTTGGTGACTCGATTTATTCTTGTTATT  
TAATTCATATATCAATGGATCTTATTTGGGGCCTGGTCCATATTTAACACTCGTGTT  
CAGTCCAATGACCAATAATTTTTTCATTAATAACAATGTAACAAGAATGATACACA  
AAACATTCTTTGAATAAGTTCGCTATGAAGAAGGGAACTTATCCGGTCTTAGATCAT

CAGTTCATACAAACCTCCATAGAGTTCAACATCTTAAACAAGAATATCCTGATCTGA  
AGAATGTGGAGGCTTTAGTCCCTTGGATACTTGGGAGGCTGTGGAAGAACAGAAA  
CGAGCTGGTGCTTAAAGGGAGGGAATTTGGAACCAATGAGGTATTAGTAAGGACA  
CAAGAAGATGCAGATGAGTGGATTAGAAGGAAAGAGGCTCAGAATGTAAGGAAAG  
CACCAACCACAACACCGTTCGGGACAGACGAGAAACATGGGAAGCTCCACCACAAT  
CTTGGGTTAAGTGCAACTTTGATGGGGCATGGCCAACAGAAGGATTAATAATGTGG  
CTTAGGGTGGGTGCTTCGCGATCATACAGGGAAGGTGTTATGGTTAGGTGCAAGA  
GCTGTGGTAAAAGTAAGAAGCGTGCTGGAAGTAGAAGTGGAGGCTCTTAGATGGG  
CTGTGCTGTCATTATCCCGATTCAATTATAGGAAGATCATTTTTGAGGTGGATTCTC  
AGCAACTTGTGTCTTTGGTTACATGAAAGTTATGCTTGTCAAGTCTCAATCCAATTA  
TCCAAGACATAAAGTATCTACTTAGCAAGTTTGAGGATTTTATGCTTGTGCATACAA  
GCCGAGAAGGAAATGGAGTGGCAGATAGAATAGCTAAGGAATCTCTTTCTTTGAG  
AATTATGATCTAAAGTTGTATTCTATTGTACCAATTTGGGTTAAAAGCTCTGTTGAGC  
TAGACTCATATGCATCCTAGGAAAC AAGTTGTAATGAGTTGCTGGCCTCTCTTGGG  
ATTGTTTCACTCAAAAGTACTGTCCCTACACACCACAACAGAATGGTGTGTTGGAGAG  
AAAGCACAGACACATCCTTGAGATGGCAAGGGCACTTAAGTTTCAGAGTGGTGTAC  
CTACCAGGTTTTGGGGAGACTGTGTCAAGACTGTTGTATACCTGATCAATAGACTC  
CCTACTCCAATCTTACAAGGCAAATGTCCATATGAACTACTCTATCAGAAACATGCC  
AAGCTTGATCACTTGAGAGTGTTTGGGTGTCTTGCTTTTGCAGCAACACTGCCCAA  
AGGTGACAAACTTGCACCTAGAGCCAAGCGAACCATCTTCATTGGTTATTCTGAGA  
CTCAAAGGGTTACAGGTTGTATGACTTGGATAATAAGGTGATCATAGTGAGCAGG  
GATGTAGTTTTTACAGAGAGTTTCAGTTCCTTTCAAAGAGTCCATCTCCCATGAACCT  
GATATGTTCACTCGAGCAGGTTCACTTAGCTCTGAAGATACAGCTTTGCAGCTAGT  
GTATAATGATATTTTTCTTCCAGCTTTCATACTGATGATGATACTCCAGTTCTT  
ATTCTGACATTGTAGAGGCCAATGAGGATATCACTTTGGGGACTCATTCTACCCA  
AAATCATATCACTTCAGCTGATGCTGCACCTTCAGGCCACCTGCATGCTCCTGCAG  
AGTCAGTTGAGTCAGCTGAGCCTGACCTAGCAAATGCTGAATTTGAGCACCATACT  
GCTGTAGCTGATCCCTCTCTAGTTCAGCAAACCTGCACACTAGACCTAAACGCAA  
TGCAGGTCCTCCCATCTGGCTCAAGGACTTTGTGACACTGAACAAAGGCTCTAGG  
GATGTTCCATACCCTATAGCCAACTATGTTTCCTATGATCACTTGCCTGTTCACTAT  
CAAGCTTATTTGAGTGCTTTCTCACTTATACTGAACCTAAATCCTTCAAAGAAGCA  
GCTCAAGATGAGAAATGGATGGAGGCCATGTCCCTTGAGATACAGGCTCTTGAGG  
ATAATAACACCTGGGAGATTGTCCCTTTACCCCCTGGTAAACAGCCTATAGGGTCC  
AAATGGGTGTACAAAATTAATACAAAGCTAATGGTGAAGTTGACAGGTTTAAGGC  
AAGGCTAGTGGCCAAGGGATACACTCAGCAAGAAGGCCTTACTACCATGAAACT  
TTTTCTCCAGTGGCCAAAATGGTCACTGTAAAAGCTGTCATATCTGTTGCTGCTTCC  
AAGGGCTGGTTCCTTTTCCAGATGGATGTCAACAATGCTTTTCTACAAGGTGACCT  
CATGGAAGAAGTTTATATGTCTCTGCCTCAGGGTTTTACAGCCAAGGGGAGACCA  
AAGTGTGCAGGCTGTTGAATCCCTCTATGGTTTAAAGCAAGCATCAAGGCAGTGGA  
ACATCAAGCTTACCACTGTCCTTATGCAGGCTGGTTTTATGCAAAGTGCTTATGATC  
ACTCCTTGTTTACCAAAGAGAGGGGACTGACCTTGTGATAATCCTGATTTATGTG  
GATGATCTGTTAATAACAGGCAGCAGCAATGTTTTGATTTCAGAAGCAAAGGCAAC  
CCTGCATCAGCATTTC AAGATGAAAGATTTGGGAGAACTAAAATACTTCTTAGGCAT  
TGAGGTGCTGAGATCAGAAAAGGGAATCCTACTGAACCAGAGGAAGTATGCACTG  
GAACTGATATCAGGTGTTGGTCTGGGAGGCTGCAGACCAGTGTCAACCCCAATGG  
AACAGAACCAAAGGCTGACTACTGTAGAATATGACAAGCACTTAGGAAAGACTGAT

GATGCAGAGTTAGAGGATGTGGGTTCCCTATCAGAGACTGGTGGGAAAGCTTCTCT  
ACTTGACAATCACAAGGCCAGATATCAGCTTTGCAGTGCAGGTGCTGAGTCAATTC  
ATGCAGCAACCCAAACAGTCACACCTGGAAGCAGCATTGAGGGTTGTGAAGTACA  
TAAAAGGTTCTCCAGGTGTTAGGAA GCGGCCGCATGCATATG AGTCTAGCTCAACA  
GAGCTTTTAACCCAAATTGGTACAATAGAATACAACCTTTAGATCATAATTCTCAAAA  
GAAAGAGATTCTTAGCTATTCTATCTGCCACTCCATTTCTTCTCGGCTTGTATGC  
ACAAGCATAAAAATCCTCAAACCTTGCTAAGTAGATACTTTATGTCTTGGATAATTGGA  
TTGAGACTTGACAAGCATAACTTTTCATGTAACCAAAGACACAAGTTGCTGAGAATC  
CACCTCAAAAATGATCTTCCCTATAATTGAATCGGGATAATGACAGCACAGCCCATCT  
AAGAGCCTCCACTTCTACTTCCAGCACGCTTCTTACTTTTACCACAGCTCTTGCACC  
TAACCATAACACCTTCCCTGTATGATCGCGAAGCACCCACCCTAAGCCACATTTTA  
ATCCTTCTGTTGGCCATGCCCCATCAAAGTTGCACTTAACCCAAGATTGTGGTGGAA  
GCTTCCCATGTTTCTCGTCTGTCCCGACGGTGTGTGGTTGGTGCTTTCCTTACAT  
TCTGAGCCTCTTTCCTTCTAATCCACTCATCTGCATCTTCTTGTGTCTTACTAATA  
CTCATTGGTTCCAAATTCCCTCCCTTTAAGCACCCAGCTCGTTTCTGTTCTTCCACAG  
CCTCCCAAGTATCCAAGGGACTAAAGCCTCCACATTCTTCAGATCAGGATATTCTT  
GTTAAGATGTTGAACTCTATGGAGGTTTGTATGAACTGATGATCTAGGACCGGAT  
AAGTTCCTTCTTCATAGCGAACTTATCAAAGAATGTTTTGTGTATCATTCTTGTTA  
CATTGTTATTAATGAAAAAATATTATTGGTCATTGGA CTGAACACGAGTGTTAAATAT  
GGACCAGGCCCAATAAGATCCATTGATATATGAATTAATAACAAGAATAAATCG  
AGTCACCAAACCACTTGCCTTTTTTAACGAGACTTGTTCCACCAACTTGATACAAAAG  
TCATTATCCTATGCAAATCAATAATCATACAAAAATATCCAATAACACTAAAAAATTA  
AAAGAAATGGATAATTTCACAATATGTTATACGATAAAGAAGTTACTTTTCCAAGAAA  
TTCACTGATTTTATAAGCCCCTTGCATTAGATAAATGGCAAAAAAAAAACAAAAAGG  
AAAAGAAATAAAGCACGAAGAATTCTAGAAAATACGAAATACGCTTCAATGCAGTG  
GGACCCACGGTTCAATTATTGCCAATTTTCAGCTCCACCGTATATTTAAAAAATAAA  
ACGATAATGCTAAAAAATAATAATCGTAACGATCGTTAAATCTCAACGGCTGGATC  
TTATGACGACCGTTAGAAATTGTGGTTGTCGACGAGTCAGTAATAAACGGCGTCAA  
AGTGGTTGCAGCCGGCACACACGAGTCGTGTTTATCAACTCAAAGCACAAATACTT  
TTCCTCAACCTAAAAATAAGGCAATTAGCCAAAAACAACCTTTGCGTGTAACAACGC  
TCAATACACGTGTCATTTTATTATTAGCTATTGCTTACC GCCTTAGCTTTCTCGTGA  
CCTAGTCGTCCCTCGTCTTTTCTTCTTCTTCTATAAAACAATACCCAAAGAGCTCT  
TCTTCTTACAATTCAGATTTCAATTTCTCAAAATCTTAAAACTTTCTCTCAATTCTC  
TCTACCGTGATCAAGGTAATTTCTGTGTTCCCTTATTCTCTCAAAATCTTCGATTTG  
TTTTCGTTCGATCCCAATTTCTGATATGTTCTTTGGTTTAGATTCTGTTAATCTTAGA  
TCGAAGACGATTTTCTGGGTTTGATCGTTAGATATCATCTTAATTCTCGATTAGGGT  
TTCATAGATATCATCCGATTTGTTCAAATAATTTGAGTTTTGTGCAATAAATACTCTT  
CGATTTGTGATTTCTATCTAGATCTGGTGTTAGTTTCTAGTTTGTGCGATCGAATTT  
GTCGATTAATCTGAGTTTTTCTGATTAACAG GGATCATCAACAAGTTTGTACAAAAA  
AGCAGGCTCTTTAAAGTATTTTTACAACAATTACCAACAACAACAACAACAACA  
CATTACAATTACTATTTACAATTACAAAAAA GTTAACATGGACAAGAAGTACAGCA  
TCGGCCTGGCCATCGGCACCAACTCTGTGGGCTGGGCCGTGATCACC GACGAGT  
ACAAGGTGCCCAGCAAGAAATTCAAGGTGCTGGGCAACACCGACCGGCACAGCAT  
CAAGAAGAACCTGATCGGCGCCCTGCTGTTGACAGCGGAGAAACAGCCGAGGC  
CACCCGGCTGAAGAGAACCGCCAGAAGAAGATACACCAGACGGAAGAACCGGAT  
CTGCTATCTGCAAGAGATCTTCAGCAACGAGATGGCCAAGGTGGACGACAGCTTC

TTCCACAGACTGGAAGAGTCCTTCCTGGTGGAAAGAGGATAAGAAGCACGAGCGGC  
ACCCCATCTTCGGCAACATCGTGGACGAGGTGGCCTACCACGAGAAGTACCCAC  
CATCTACCACCTGAGAAAGAACTGGTGGACAGCACCGACAAGGCCGACCTGCGG  
CTGATCTATCTGGCCCTGGCCACATGATCAAGTTCCGGGGCCACTTCCTGATCG  
AGGGCGACCTGAACCCCGACAACAGCGACGTGGACAAGCTGTTTCATCCAGCTGGT  
GCAGACCTACAACCAGCTGTTTCGAGGAAAACCCCATCAACGCCAGCGGCGTGGAC  
GCCAAGGCCATCCTGTCTGCCAGACTGAGCAAGAGCAGACGGCTGGAAAATCTGA  
TCGCCAGCTGCCCGGCGAGAAGAAGAATGGCCTGTTTCGGCAACCTGATTGCCCT  
GAGCCTGGGCCTGACCCCAACTTCAAGAGCAACTTCGACCTGGCCGAGGATGC  
CAAAGTGCAGCTGAGCAAGGACACCTACGACGACGACCTGGACAACCTGCTGGCC  
CAGATCGGCGACACGACGACCTGTTTCTGGCCGCCAAGAACCTGTCCGACG  
CCATCCTGCTGAGCGACATCCTGAGAGTGAACACCGAGATCACCAAGGCCCCCT  
GAGCGCCTCTATGATCAAGAGATACGACGAGCACACCAGGACCTGACCCCTGCTG  
AAAGCTCTCGTGCGGCAGCAGCTGCCTGAGAAGTACAAAGAGATTTTCTTCGACC  
AGAGCAAGAACGGCTACGCCGGCTACATCGATGGCGGAGCCAGCCAGGAAGAGT  
TCTACAAGTTCATCAAGCCCATCCTGGAAAAGATGGACGGCACCGAGGAAGTCT  
CGTGAAGCTGAACAGAGAGGACCTGCTGCGGAAGCAGCGGACCTTCGACAACGG  
CAGCATCCCCACCAGATCCACCTGGGAGAGCTGCACGCCATTCTGCGGGCGGCA  
GGAAGATTTTACCATTCTGAAGGACAACCGGGAAAAGATCGAGAAGATCCTGA  
CCTTCCGCATCCCCTACTACGTGGGCCCTCTGGCCAGGGGAAACAGCAGATTCCG  
CTGGATGACCAGAAAGAGCGAGGAAACCATCACCCCTGGAAGTTCGAGGAAGTG  
GTGGACAAGGGCGCCAGCGCCAGAGCTTCATCGAGCGGATGACCAACTTCGAT  
AAGAACCTGCCCAACGAGAAGGTGCTGCCCAAGCACAGCCTGCTGTACGAGTACT  
TCACCGTGTACAACGAGCTGACCAAAGTGAAATACGTGACCGAGGGAATGAGAAA  
GCCCGCCTTCCTGAGCGGCGAGCAGAAAAAAGCCATCGTGGACCTGCTGTTCAAG  
ACCAACCGGAAAGTGACCGTGAAGCAGCTGAAAGAGGACTACTTCAAGAAAATCG  
AGTGCTTCGACTCCGTGGAATCTCCGGCGTGGAAGATCGGTTCAACGCCTCCCT  
GGGCACATAACCAGATCTGCTGAAAATTATCAAGGACAAGGACTTCCTGGACAATG  
AGGAAAACGAGGACATTCTGGAAGATATCGTGCTGACCCCTGACACTGTTTGAGGA  
CAGAGAGATGATCGAGGAACGGCTGAAAACCTATGCCACCTGTTTCGACGACAAA  
GTGATGAAGCAGCTGAAGCGGCGGAGATACACCGGCTGGGGCAGGCTGAGCCG  
GAAGCTGATCAACGGCATCCGGGACAAGCAGTCCGGCAAGACAATCCTGGATTTC  
CTGAAGTCCGACGGCTTCGCCAACAGAACTTCATGCAGCTGATCCACGACGACA  
GCCTGACCTTTAAAGAGGACATCCAGAAAGCCCAGGTGTCCGGCCAGGGCGATAG  
CCTGCACGAGCACATTGCCAATCTGGCCGGCAGCCCCGCCATTAAGAAGGGCATC  
CTGCAGACAGTGAAGGTGGTGGACGAGCTCGTGAAAGTGATGGGCCGGCACAAG  
CCCGAGAACATCGTGATCGAAATGGCCAGAGAGAACCAGACCACCCAGAAGGGA  
CAGAAGAACAGCCGCGAGAGAATGAAGCGGATCGAAGAGGGCATCAAAGAGCTG  
GGCAGCCAGATCCTGAAAGAACACCCCGTGGAAAACACCCAGCTGCAGAACGAGA  
AGCTGTACCTGTACTACCTGCAGAATGGGCGGGATATGTACGTGGACCAGGAAGT  
GGACATCAACCGGCTGTCCGACTACGATGTGGACGCTATCGTGCCTCAGAGCTTT  
CTGAAGGACGACTCCATCGATAACAAAGTGCTGACTCGGAGCGACAAGAACCGGG  
GCAAGAGCGACAACGTGCCCTCCGAAGAGGTCGTGAAGAAGATGAAGAACTACTG  
GCGCCAGCTGCTGAATGCCAAGCTGATTACCCAGAGGAAGTTCGACAATCTGACC  
AAGGCCGAGAGAGGGCGCCTGAGCGAACTGGATAAGGCCGGCTTCATCAAGAGA  
CAGCTGGTGGAAACCCGGCAGATCACAAAGCACGTGGCACAGATCCTGGACTCCC

GGATGAACACTAAGTACGACGAGAACGACAACTGATCCGGGAAGTGAAAGTGAT  
CACCTGAAGTCCAAGCTGGTGTCCGATTTCCGGAAGGATTTCCAGTTTTACAAG  
TGCGCGAGATCAACAACACTACCACCACGCCACGACGCCTACCTGAACGCCGTCGT  
GGAAACCGCCCTGATCAAAAAGTACCCTAAGCTGGAAAGCGAGTTCGTGTACGGC  
GACTACAAGGTGTACGACGTGCGGAAGATGATCGCCAAGAGCGAGCAGGAAATC  
GGCAAGGCTACCGCCAAGTACTTCTTCTACAGCAACATCATGAACTTTTTCAAGAC  
CGAGATTACCCTGGCCAACGGCGAGATCCGGAAGCGGCCTCTGATCGAGACAAA  
CGGCGAAACAGGCGAGATCGTGTGGGATAAGGGCCGGGACTTTGCCACCGTGCG  
GAAAGTGCTGTCTATGCCCAAGTGAATATCGTGAAAAGACCGAGGTGCAGACA  
GGCGGCTTCAGCAAAGAGTCTATCCTGCCCAAGAGGAACAGCGACAAGCTGATCG  
CCAGAAAGAAGGACTGGGACCCTAAGAAGTACGGCGGCTTCGACAGCCCCACCG  
TGGCCTATTCTGTGCTGGTGGTGGCCAAAGTGGAAGGGCAAGTCCAAGAACT  
GAAGAGTGTGAAAGAGCTGCTGGGGATCACCATCATGGAAAGAAGCAGCTTCGAG  
AGAATCCCATCGACTTTCTGGAAGCCAAGGGCTACAAAGAAGTGAAAAGGACCT  
GATCATCAAGCTGCCTAAGTACTCCCTGTTTCGAGCTGGAAAACGGCCGGAAGAGA  
ATGCTGGCCTCTGCCGGCGAACTGCAGAAGGGAAACGAACTGGCCCTGCCCTCC  
AAATATGTGAACTTCTGTACCTGGCCAGCCACTATGAGAAGCTGAAGGGCTCCC  
CCGAGGATAATGAGCAGAAACAGCTGTTTGTGGAACAGCACAAACACTACCTGGA  
CGAGATCATCGAGCAGATCAGCGAGTTCTCCAAGAGAGTGATCCTGGCCGACGCT  
AATCTGGACAAGGTGCTGAGCGCCTACAACAAGCACAGAGACAAGCCTATCAGAG  
AGCAGGCCGAGAATATCATCCACCTGTTTACCCTGACCAATCTGGGAGCCCCTGC  
CGCCTTCAAGTACTTTGACACCACCATCGACCGGAAGAGGTACACCAGCACCAA  
GAGGTGCTGGACGCCACCCTGATCCACCAGAGCATCACCGGCCTGTACGAGACA  
CGGATCGACCTGTCTCAGCTGGGAGGCGACGCC**TATCCCTATGACGTGCCCGATT**  
**ATGCC**AGCCTGGGCAGCGGCTCCCCAAGAAAAACGCAAGGTGGAAGATCCTAA  
GAAAAGCGGAAAGTGGAAGATGCTCCAAGAAGAAGAGAAAGGTC**GACGGCATT**  
**GGTAGTGGGAGCAACGGCAGCAGCGGATCCAACGGTCCGACTGACGCCGCG****GAA**  
**GAAGA**ACTTTTGAGCAAGAATTATCATCTTGAGAACGAAGTGGCTCGTCTTAAGAA  
AGGTTCTGGCAGTGGAGTTCTGGCTCCGGATCTGGTGGTTCGGGCTCAGGCGG  
GTCCGGATCAGGCGAAGAAGTCTTTCAAAGAATTACCACCTGGAAAATGAGGTA  
GCTAGACTGAAAAGGGGAGCGGAAGTGGGGGCTCCGGGTCCGGGCTCAGGGGG  
CTCCGGTTCGGGAGGCTCAGGGTCCGGGGAGGAGTTGCTGAGCAAAAATTATCAT  
TTGGAGAACGAAGTAGCACGACTAAAGAAAGGGTCCGGATCCGGTGGTTCAGGAT  
CTGGATCCGGAGGATCAGGGTCCGGTGGGTCCGGGCTCAGGAGAGGAGTTACTCT  
CGAAAATTATCATCTCGAAAACGAAGTGGCTCGGCTAAAAAGGGCAGTGGTTCT  
GGAGGATCTGGGTCCGGGTCAGGCGGGTCTGGATCTGGGGGATCTGGATCTGGT  
GAAGAGCTATTATCTAAAACTACCACCTCGAAAATGAGGTGGCACGCTTAAAAA  
GGGAAGTGGCAGTGGTGGTCCGGATCTGGCTCTGGTGGCTCAGGCTCCGGAGG  
TTCAGGTTCCGGGGAAGAGCTACTATCCAAGAATTATCATCTTGAGAACGAGGTAG  
CGCGTTTGAAGAAGGGTCCGGCTCAGGAGGATCTGGGTCCGGTCCAGGGGTT  
CCGGGTCCAGGCGGGTCCGGGTCCAGGCGAGGAAGTCTCTCGAAGAAGTATCATC  
TTGAAAATGAGGTCGCTCGATTAAAAAGGGATCGGGCAGTGGTGGGTCCGGCTC  
CGTTCCGGAGGATCCGGATCTGGGGGCTCCGGATCCGGGAGGAACTACTTTC  
AAAGAATTACCACCTCGAAAACGAAGTAGCTCGATTAAAGAAAGGTTCCAGGGTCG  
GTGGCTCAGGTTCCGGATCAGGTGGGTCCAGGCTCCGGTGGTTCAGGTTCCGGAG  
AGAATTACTGAGTAAAAATTATCATCTGGAAGTGGTGGTCCAGGACTAAAAAG



GGGAGTGGTTCTGGCGGTTCTGGGATCTGGCTCTGGGGGCTCTGGGTCTGGGAGGG  
TCTGGGTCTGGCGAGGAATTGCTATCGAAAAATTATCATCTTGAGAACGAAGTTGC  
TAGGCTCAAAAAGGGCTCAGGCTCAGGCGGGTCCGGGTCTAGGGTCTGGGAGGTTCC  
CGGATCCGGGGGATCAGGCTCAGGGTAA<sup>CCCCGGGGGCGCGCCATGATAACTAGA</sup>  
GTCCTGCTTTAATGAGATATGCGAGACGCCTATGATCGCATGATATTTGCTTTCAAT  
TCTGTTGTGCACGTTGTAACCACTGAGCATGTGTAGCTCAGATCCTTACCGCCG  
GTTTCGGTTCATTCTAATGAATATATCACCCGTTACTATCGTATTTTTATGAATAATA  
TTCTCCGTTCAATTTACTGATTGTACCCTACTACTTATATGTACAATATTAATAATGAA  
AACAAATATATTGTGCTGAATAGGTTTATAGCGACATCTATGATAGAGCGCCACAATA  
ACAAACAATTGCGTTTTATTATTACAAATCCAATTTTAAAAAAGCGGCAGAACCGG  
TCAAACCTAAAAGACTGATTACATAAATCTTATTCAAATTTCAAAGTGCCCCAGGG  
GCTAGTATCTACGACACACCGAGCGGCGAATAACGCTCACTGAAGGGAAGT  
CCGGTTCCTCCGCGCGCGCATGGGTGAGATTCCTTGAAGTTGAGTATTGGCCGT  
CCGCTCTACCGAAAGTTACGGGCACCATTCAACCCGGTCCAGCACGGCGGCGCG  
GTAACCGACTTGCTGCCCGAGAATTATGCAGCATTTTTTTGGTGTATGTGGGCC  
CAAATGAAGTGCAGGTCAAACCTTGACAGTGACGACAAATCGTTGGGCGGGTCCA  
GGGCGAATTTTGCACAACATGTCGAGGCTCAGCAGGACCGGCATGCAAGCTAGC  
TTACTAGTGATATTCTATAGTGTCACCTAAATCTGCGGC

**SunTagFWAg4-14aa-TET1cd**

**gRNA FWAg4**

**U6**

**NOS term**

**TET1cd**

**2xNLS**

**Linker**

**1xHA**

**sfGFP**

**scFV**

**UBQ10**

**Insulator**

**Omega RBC**

**dCAS9**

**3xNLS**

**GCN4 10x 14aa**

**OCS term**

AAAAAAGCACCGACTCGGTGCCACTTTTTCAAGTTGATAACGGACTAGCCTTATTT  
TAACCTTGCTATTTCTAGCTCTAAAACAAGCCCATACATCTTTCCGTCAATCACTACTT  
CGACTCTAGCTGTATATAAACTCAGCTTCGTTTTCTTATCTAAGCGATGTGGGACTT  
TTGAAGATTGTTTTCAACTTAAATGGGCCTATATAAGAAATACTATTGTTCTTTCCCA  
TATAAATGGGCCTGCTTCTCTTTTCCAGATTCCCAGGGGCCTTTTGAAGATTATCT  
TCATATCTTAAGAATGAAGATGTTTTATTCAATCAAATTTCTTGAAGGTTTCGATGCCTA  
ATCATTCTAATCCTGGGACAACTATGAAACAAGATACAAAACTCCGAATGGAAA  
GTTAAAAAGAAGAAAACGAAAGCTACGGTTCAAGAAAATGTAAGCTGATAAACAAA  
AAAAAAGTATGAACGAAGAAGAAGAAAAAAGCTAAGAAGAATGATGTATTGT

GCGGAAGGCAAGTCGAGTTTCCGTTGTTCAACGAAAGCTTAAACGTAACATAGATG  
ACACCGCGCGGATAATTTATCCTAGTTTGC GCGCTATATTTTGT TTTCTATCGCGT  
ATTAATGTATAATTGCGGGACTCTAATCATAAAAACCCATCTCATAAATAACGTCA  
TGCATTACATGTTAATTATTACATGCTTAACGTAATTCAACAGAAATTATATGATAAT  
CATCGCAAGACCGGCAACAGGATTCAATCTTAAGAACTTTATTGCCAAATGTTTGA  
ACGATCGGGGAAATTTCGAGCTCAAACCTACGGCCATGGCGTAGGCGGCCTTTTCC  
GTTGTGATCTTCGCGGTCTCCTCCTTGT TTTTGGACTAGTACCACCACCGCTACCA  
CCACCTTCGGTTACCGTGAAGGTTTTGGTAGCGTCGTCGTAGGTCCATTCACCGTC  
AACACCGTTGTCGTTAGCGTACTGTTTGAAAACCTTTTCCGCGGTAGCAGCGTCAA  
CAGCTTCGGTGGTGGTTTCACCTTTCAGGGTTTTACCGTTCAGGATAAGCTTGTAC  
TCTTCGGTCCGAGATCCTCCTCCCGTACGTCAGACCCAATGGTTATAGGGCCCCG  
CAACGTGTGTGAGAGCATAAGGGGACACGGTGACAACATTGTCATGGGTAAATGT  
TAATGCTTTATGAGAAGGAATTTGGTTCAATTCATTTACTTCAGAGGACTGTTCTGG  
ACCTTCATTAGCTGCCTGGTCTTTTTGCTCTGAGGCCTTCATTTTCTTATTCTTAGCT  
TCTTTAGCCTCAAACCTAATCTTGTTAGTTCAAACCATGTTGGGGCTTATTTAGGT  
TTTTGTGCTGGTAAAAGACAAGGGAGAGGCGGGTTGGATGATTACGGTTGGGGTG  
CTCAACAGGAGTGGTAGCGTGCAGCTCTCGCCGGGCACACTCAATCAAACCGAG  
CCGTGAGCAGGTGCGATGGCCACCCACCAATATTTGCATCCAAAAGATGTGCT  
CACTGTCTGACCAATACTCATCAATGTGGGGCAATTTCTCCTCAGCAGGTGACAGG  
GGGTCATCAGATAGGGGTTTCGTCTGATGGAGGCTCATCTGCTTCAGAATGCTGCT  
CATCTTCTTCCATTGGAGAAGAGGGCAAGGTCTTGAGGAGAGGTGAGGAAGGAGGG  
CTGGTGGTTTGGCTGATGAGGCGTTAGCGGCTCAGTCACACCAGTGGAAGGCTCA  
GAATTAATGAGGGGCTCCATCACAGGAGCAGACAGGGTGGGGAGAGGAGCCACT  
TCGCCAAGCTGTGAAATGCCAGGGCCATCAGCAGCTGCAGCATTGGCACCCTGA  
GTCTTCCCGAAGGCATCGTACAGTGGGGAGTGTGCTTCTTTCTGAAAACCCGCAT  
GAGGCTGTTGCGTCATTCTTCAGTGGAGCTGGTGTGGCTGAAGCAGTCTTCGGGG  
ACCAGGAGAAGCCTGGAGATGCCTCTTTCACTGGGTGAGGAGCGGATGGCATCA  
GCGAATAAGTTTTAGTGTGTCTGAACTTTTTAAGATAAAAATGGGGTTCGGTTTAC  
TTTTACTTCAGGTTGCACGGTCTCAGTGTTACTCCCTAAGGTTGGCAGTGACGAA  
GGCTTACTGTTGTTTGTGTTGTTGAGTTATTCTTCCGCTTGATTCCGGGAATAGGT  
TTCTTTTCCACTGCCCTTATCTTATGTGCAAGAACCTCTGTCATCATCGCAGCCCTC  
TTCTTTCCAGAACGGGGAACAGGCTGAGTGAAACACGTTCTTTTTTTGCGGGCGGG  
GTGCCAGGACCTCGATGGCCCCAGATTTGATCTTGGCTTCCATTCCCTTCCCTGGAG  
CCAAACTCATCTGTGTCTGAAAGCTTATAAAGAGGTAGCACATGGAGCTGCTCATC  
TTGAGGAATAACACCCAAAGAGCGGTTATCTTCTCGAGTTAAGGTACAAACCACAG  
TGCTTCCATTATTCATGTTGTGAATGTCCCTGTGGGGATGAGCACAGAAGTCCAGG  
CAAGCAGTGACCCAGAGAAGGGTCGACCTTCCCTGCTGCCAAGCCGACATTCTC  
GGGCAACATTTTCATATTCCACCTGATTTTGGTAAGCTACTGGAGCATACTGCTTAT  
AAATTGGAGCTAATCGTGTAGCCAAACTCTGTAAGTTATCTTCAAGGTTTTTTTTCAT  
GTAAGGGAGAGCTTGGATCAATTCTAAATCTTCTGGGGCTTGGGCTTCTACCAAAC  
TTACAGCCATTAAGTACATACTCCATGAACAGCCAAAAGAGAATGAAGCTCCACA  
AGTCTCTGGATCAATTCCTTGACATGTACAGGTACGATTTTCATTGAGGGTGCATCT  
TCTGTCCGTAGGGTGCCATTGTATGACTTTAGATTCTCTGTGAGCTCTGTGTATA  
GCCGGTCCGGCCATTGGAAGAGGGATGCCATCCCACACCATGATGAGCACCACCAT  
CACAGCAGTTGGACAGTGGTGGCCTGTACGCTGCCGGACCAAACAAGAAGCTTTT  
TCTTCATCACTGCTTCTTCTTAAACCCACTTAGCAATTGGACACCCATGAGAGCTT

TTCCCTTCTTTACCGGTGTACACTACTATTTCTATCCTTATTGCGTTTCCTTTTTGAC  
CATACTATTCTCCATGATTTCCCTGACAGCAGCAACACTTGGTCCTGCCCAAGG  
TGTGTATAATATGGGCCTTTGTCTTTTTGTATAACTCGATCAAGACAGCTGCAGGTG  
GGCAGCCCGGATCCGCCACCGCCCACTTTCCGCTTTTTCTTAGGAGCTTCCACCTT  
GCGTTTTTCTTGGGAGCGCCGCTGCCAGGCTGGCATAATCGGGCACGTCATAG  
GGATACGTACGACCGGTCCGACCTCCACC TTGTAGAGCTCATCCATGCCATGTGT  
AATCCCAGCAGCAGTTACAACTCAAGAAGGACCATGTGGTCACGCTTTTCGTTGG  
GATCTTTCGAAAGGACAGATTGTGTCGACAGGTAATGGTTGTCTGGTAAAAGGACA  
GGGCCATCGCCAATTGGAGTATTTGTTGATAATGGTCTGCTAGTTGAACGGAACC  
ATCTTCAACGTTGTGGCGAATTTGAAGTTAGCTTTGATTCCATTCTTTGTTGTCT  
GCCGTGATGTATACATTGTGTGAGTTAAAGTTGACTCGAGTTTGTGTCCAAGAAT  
GTTCCATCTTCTTAAATCAATACCCTTAACTCGATACGATTAACAAGGGTATCA  
CCTTCAAACCTTGACTTCAGCACGCGTCTTGTAGGTCCCGTCATCTTGAAAGATATA  
GTGCGTTCCTGTACATAACCTTCGGGCATGGCACTCTTGAAAAAGTCATGCCGTTT  
CATGTGATCCGGATAACGGGAAAAGCATTGAACACCATAGGTCAGAGTAGTGACA  
AGTGTGGCCACGGAACAGGTAGTTTTCCAGTAGTGCAAATAAATTAAGGGTGAG  
TTTTCCGTTTGTAGCATCACCTTACCCTCTCCACGGACAGAAAATTTGTGCCATT  
AACATCACCATCTAATTCAACAAGAATTGGGACAACCTCCAGTGAAAAGTTCTTCTCC  
TTTGTACCGCTTCCACCTCCACCTGGATCCAA GCTTCCGCCGCTCCTGAACCAC  
CACCGCCACTACCTCCTCCCCAGAACCTCCGCCTCCACCAGCGTAATCTGGAAC  
ATCGTATGGGTAGCTGCTCACGGTCACCAGGGTGCCCTGGCCCCAGTAGTCGAAC  
AGGCCGGTCACGCAGTAGTACAGGGCGGTGTCGTCGCTGCGCACCTTGCTCATCT  
GCAGGTACACGGTGTTCTTGCCGTTGTCCTTGCTGATGATGAAGCGGTCCTTCAG  
GGCGCTGTTGTAGTCGGTGATGCCGTGCCCCAGATCACGCCGATCCACTCCAGG  
CCGCGGCCGGGGGCTGGCGCACCCAGTTCACGCCGTAGTCGGTCAGGCTGAA  
GCCGCTCACGGCGCAGCTCAGCTTCAGGCTGCCGCCGGGCTGCACCAGGCGGCC  
GCCGCTCTCCAGCAGCTTACCTCGCTGCCGCCGCCGCTGCTGCCGCCGCCGCC  
GCTGCCGCCGCCGCCGCTGCCGCCGCCGCCGCCGCTTCAGCTCCACCTTGGTGCC  
CTGGCCGAACACCAGTGTTGCTGTACCACAGGGCGCAGAAGTAGGTGGCGAA  
GTCCTCGGGCTGCAGGCTGCTGATGGTCAGGGTGGCCTTGTCCCGATCAGGCT  
GCCGCTGAAGCGGCTGGGCACGCCGGGGGCGCGGTTGTTGGTGCCGCCGATCA  
GGCCCTTGAACAGCTTGCCGGGCTTCTCTGCACCAGCTGGCGTAGTTGCTGGT  
GGTCACGGCGCCGGTGCTGCTGCGGCAGGTGATGGTCACGCGGTCGCCACGCT  
GGCGCTCAGGCTGCTGGGGCTCTGGGTGATCACGATGTCGGGGCCCAT AAACCC  
TAGG TGTTAATCAGAAAACTCAGATTAATCGACAAATTCGATCGCACAAACTAGAA  
ACTAACACCAGATCTAGATAGAAATCACAAATCGAAGAGTAATTATTCGACAAAAC  
CAAATTATTTGAACAAATCGGATGATATCTATGAAACCCTAATCGAGAATTAAGATG  
ATATCTAACGATCAAACCCAGAAAATCGTCTTCGATCTAAGATTAACAGAATCTAAA  
CCAAAGAACATATACGAAATTGGGATCGAACGAAAACAAAATCGAAGATTTTGAGA  
GAATAAGGAACACAGAAATTTACCTTGATCACGGTAGAGAGAATTGAGAGAAAGTT  
TTTAAGATTTTGAGAAATTGAAATCTGAATTGTGAAGAAGAAGAGCTCTTTGGGTAT  
TGTTTTATAGAAGAAGAAGAAGAAAAGACGAGGACGACTAGGTCACGAGAAAGCTA  
AGGCGGTGAAGCAATAGCTAATAATAAAAATGACACGTGTATTGAGCGTTGTTTACA  
CGCAAAGTTGTTTTGGCTAATTGCCTATTTTTAGGTTGAGGAAAAGTATTTGTGC  
TTTGAGTTGATAAACACGACTCGTGTGTGCCGGCTGCAACCCTTTGACGCCGTTT  
ATTACTGACTCGTCGACAACCACAATTTCTAACGGTTCGTCATAAGATCCAGCCGTT

GAGATTTAACGATCGTTACGATTTATATTTTTTTAGCATTATCGTTTTATTTTTTAAAT  
ATACGGTGGAGCTGAAAATTGGCAATAATTGAACCGTGGGTCCCCTGCATTGAAG  
CGTATTTTCGTATTTTCTAGAATTCTTCGTGCTTTATTTCTTTTCCTTTTTGTTTTTTTT  
GCCATTTATCTAATGCAAGTGGGCTTATAAAATCAGTGAATTTCTTGAAAAGTAAC  
TTCTTTATCGTATAACATATTGTGAAATTATCCATTTCTTTAATTTTTTAGTGTTATT  
GGATATTTTTGTATGATTATTGATTGTCATAGGATAATGACTTTTGTATCAAGTTGGT  
GAACAAGTCTCGTTAAAAAAGGCAAGTGGTTTGGTGACTCGATTTATTCTTGTTATT  
TAATTCATATATCAATGGATCTTATTTGGGGCCTGGTCCATATTTAACTCGTGTT  
CAGTCCAATGACCAATAATTTTTTTCATTAATAACAATGTAACAAGAATGATACACA  
AAACATTCTTTGAATAAGTTCGCTATGAAGAAGGGAAGTTATCCGGTCCCTAGATCAT  
CAGTTCATACAAACCTCCATAGAGTTCAACATCTTAAACAAGAATATCCTGATCTGA  
AGAATGTGGAGGCTTTAGTCCCTTGATACTTGGGAGGCTGTGGAAGAACAGAAA  
CGAGCTGGTGCTTAAAGGGAGGGGAATTTGGAACCAATGAGGTATTAGTAAGGACA  
CAAGAAGATGCAGATGAGTGGATTAGAAGGAAAGAGGCTCAGAATGTAAGGAAAG  
CACCAACCACAACACCGTTCGGGACAGACGAGAAACATGGGAAGCTCCACCACAAT  
CTTGGGTTAAGTGCAACTTTGATGGGGCATGGCCAACAGAAGGATTAAAATGTGG  
CTTAGGGTGGGTGCTTCGCGATCATACAGGGGAAGGTGTTATGGTTAGGTGCAAGA  
GCTGTGGTAAAAGTAAGAAGCGTGCTGGAAGTAGAAGTGGAGGCTCTTAGATGGG  
CTGTGCTGTCATTATCCCGATTCAATTATAGGAAGATCATTTTTGAGGTGGATTCTC  
AGCAACTTGTGTCTTTGGTTACATGAAAGTTATGCTTGTCAAGTCTCAATCCAATTA  
TCCAAGACATAAAGTATCTACTTAGCAAGTTTGGAGATTTTATGCTTGTGCATACAA  
GCCGAGAAGGAAATGGAGTGGCAGATAGAATAGCTAAGGAATCTCTTTCTTTGAG  
AATTATGATCTAAAGTTGTATTCTATTGTACCAATTTGGGTTAAAAGCTCTGTTGAGC  
TAGACTCATATGCATCCTAGGAAACAAAGTTGTAATGAGTTGCTGGCCTCTCTTGGG  
ATTGTTCAACAAAGTAGCTGTCCCTACACACCACAACAGAATGGTGTGTGGAGAG  
AAAGCACAGACACATCCTTGAGATGGCAAGGGCACTTAAGTTTCAGAGTGGTGTAC  
CTACCAGGTTTTGGGGAGACTGTGTCAAGACTGTTGTATACCTGATCAATAGACTC  
CCTACTCCAATCTTACAAGGCAAATGTCCATATGAACTACTCTATCAGAAACATGCC  
AAGCTTGATCACTTGAGAGTGTTTGGGTGTCTTGCTTTTGCAGCAACACTGCCCAA  
AGGTGACAACTTGACCTAGAGCCAAGCGAACCATCTTCATTGGTTATTCTGAGA  
CTCAAAGGGTTACAGGTTGTATGACTTGGATAATAAGGTGATCATAGTGAGCAGG  
GATGTAGTTTTTCAGAGAGTTTCAGTTCCCTTTCAAAGAGTCCATCTCCCATGAACCT  
GATATGTTCACTCGAGCAGTTCACTTAGCTCTGAAGATACAGCTTTGCAGCTAGT  
GTATAATGATATTTTTCTTCCAGCTTTCATACTGATGATGATACTCCAGTTCTT  
ATTCCTGACATTGTAGAGGCCAATGAGGATATCACTTTGGGGACTCATTCTACCCA  
AAATCATATCACTTCAGCTGATGCTGCACCTTCAGGCCACCTGCATGCTCCTGCAG  
AGTCAGTTGAGTCAGCTGAGCCTGACCTAGCAAATGCTGAATTTGAGCACCATACT  
GCTGTAGCTGATCCCTCTCTAGTTCCAGCAAACCTGCACACTAGACCTAAACGCAA  
TGCAGGTCCTCCCATCTGGCTCAAGGACTTTGTGACACTGAACAAAGGCTCTAGG  
GATGTTCCATACCCTATAGCCAACCTATGTTTCCTATGATCACTTGCCTGTTCACTAT  
CAAGCTTATTTGAGTGCTTTCTCCACTTATACTGAACCTAAATCCTTCAAAGAAGCA  
GCTCAAGATGAGAAATGGATGGAGGCCATGTCCCTTGAGATACAGGCTCTTGAGG  
ATAATAACACCTGGGAGATTGTCCCTTACCCCCTGGTAAACAGCCTATAGGGTCC  
AAATGGGTGTACAAAATTAATACAAAGCTAATGGTGAAGTTGACAGGTTAAGGC  
AAGGCTAGTGGCCAAGGGATACACTCAGCAAGAAGGCCTTACTACCATGAAACT  
TTTTCTCCAGTGGCCAAAATGGTCACTGTAAAAGCTGTCATATCTGTTGCTGCTTCC

AAGGGCTGGTTCCTTTTCCAGATGGATGTCAACAATGCTTTTCTACAAGGTGACCT  
CATGGAAGAAGTTTATATGTCTCTGCCTCAGGGTTTTACAGCCAAGGGGAGACCA  
AAGTGTGCAGGCTGTTGAATCCCTCTATGGTTTAAAGCAAGCATCAAGGCAGTGA  
ACATCAAGCTTACCACTGTCCTTATGCAGGCTGGTTTTATGCAAAGTGCTTATGATC  
ACTCCTTGTTTACCAAAAAGAGAGGGGACTGACCTTGTGATAATCCTGATTTATGTG  
GATGATCTGTTAATAACAGGCAGCAGCAATGTTTTGATTTGAGAAGCAAAGGCAAC  
CCTGCATCAGCATTTCAGATGAAAGATTTGGGAGAACTAAAATACTTCTTAGGCAT  
TGAGGTGCTGAGATCAGAAAAGGGAATCCTACTGAACCAGAGGAAGTATGCACTG  
GAACTGATATCAGGTGTTGGTCTGGGAGGCTGCAGACCAGTGTCAACCCCAATGG  
AACAGAACCAAAGGCTGACTACTGTAGAATATGACAAGCACTTAGGAAAGACTGAT  
GATGCAGAGTTAGAGGATGTGGGTTCCATCAGAGACTGGTGGGAAAGCTTCTCT  
ACTTGACAATCACAAGGCCAGATATCAGCTTTGCAGTGCAGGTGCTGAGTCAATTC  
ATGCAGCAACCCAAACAGTCACACCTGGAAGCAGCATTGAGGGTTGTGAAGTACA  
TAAAGGTTCTCCAGGTGTTAGGAAAGCGGCCGCATGCATATGAGTCTAGCTCAACA  
GAGCTTTTAACCCAAATTGGTACAATAGAATACAACTTTAGATCATAATTCTCAAAA  
GAAAGAGATTCCCTAGCTATTCTATCTGCCACTCCATTTCTTCTCGGCTTGTATGC  
ACAAGCATAAAATCCTCAAACCTTGCTAAGTAGATACTTTATGTCTTGGATAATTGGA  
TTGAGACTTGACAAGCATAACTTTCATGTAACCAAAGACACAAGTTGCTGAGAATC  
CACCTCAAAAATGATCTTCCCTATAATTGAATCGGGATAATGACAGCACAGCCCATCT  
AAGAGCCTCCACTTCTACTTCCAGCACGCTTCTTACTTTTACCACAGCTCTTGCACC  
TAACCATAACACCTTCCCTGTATGATCGCGAAGCACCCACCCTAAGCCACATTTTA  
ATCCTTCTGTTGGCCATGCCCCATCAAAGTTGCACTTAACCCAAGATTGTGGTGGAA  
GCTTCCCATGTTTCTCGTCTGTCCCGACGGTGTTGTGGTTGGTGCTTTCCTTACAT  
TCTGAGCCTCTTTCCTTCTAATCCACTCATCTGCATCTTCTTGTGTCCCTACTAATA  
CTCATTGGTTCCAAATTCCCTCCCTTAAAGCACCCAGCTCGTTTCTGTTCTTCCACAG  
CCTCCCAAGTATCCAAGGGACTAAAGCCTCCACATTCTTCAGATCAGGATATTCTT  
GTTAAGATGTTGAACTCTATGGAGGTTTGTATGAACTGATGATCTAGGACCGGAT  
AAGTCCCTTCTTCATAGCGAACTTATTCAAAGAATGTTTTGTGTATCATTCTTGTTA  
CATTGTTATTAATGAAAAAATATTATTGGTCATTGGAAGTGAACACGAGTGTTAAATAT  
GGACCAGGCCCAATAAGATCCATTGATATATGAATTAATAACAAGAATAAATCG  
AGTCACCAAACCACTTGCCTTTTTTAACGAGACTTGTTACCAACTTGATACAAAAG  
TCATTATCCTATGCAAATCAATAATCATAAAAAATCCAATAACACTAAAAAATTA  
AAAGAAATGGATAATTTACAATATGTTATACGATAAAGAAGTACTTTTCCAAGAAA  
TTCCTGATTTTATAAGCCCACTTGCATTAGATAAATGGCAAAAAAAAAACA AAAAGG  
AAAAGAAATAAAGCACGAAGAATTCTAGAAAATACGAAATACGCTTCAATGCAGTG  
GGACCCACGGTTC AATTATTGCCAATTTTCAGCTCCACCGTATATTTAAAAAATAAA  
ACGATAATGCTAAAAAAATATAAATCGTAACGATCGTTAAATCTCAACGGCTGGATC  
TTATGACGACCGTTAGAAATTGTGGTTGTCGACGAGTCAGTAATAAACGGCGTCAA  
AGTGGTTGCAGCCGGCACACACGAGTCGTGTTTATCAACTCAAAGCACAAATACTT  
TTCCTCAACCTAAAAATAAGGCAATTAGCCAAAAACAACCTTTGCGTGTAACAACGC  
TCAATACACGTGTCATTTTATTATTAGCTATTGCTTCACCGCCTTAGCTTTCTCGTGA  
CCTAGTCGTCCTCGTCTTTTCTTCTTCTTCTATAAAAACAATACCCAAAGAGCTCT  
TCTTCTTACAATTCAGATTTCAATTTCTCAAAATCTTAAAACTTTCTCTCAATTCTC  
TCTACCGTGATCAAGGTAATTTCTGTGTTCCCTATTCTCTCAAAATCTTCGATTTTG  
TTTTCGTTCGATCCCAATTCGTATATGTTCTTTGGTTAGATTCTGTTAATCTTAGA  
TCGAAGACGATTTTCTGGGTTTGTATCGTTAGATATCATCTTAATTCTCGATTAGGGT

TTCATAGATATCATCCGATTTGTTCAAATAATTTGAGTTTTGTGCGAATAAATTACTCTT  
CGATTTGTGATTTCTATCTAGATCTGGTGTAGTTTCTAGTTTGTGCGATCGAATTT  
GTCGATTAATCTGAGTTTTTCTGATTAACAGGGATCATCAACAAGTTTGTACAAAAA  
AGCAGGCTCTTTAAAGTATTTTTACAACAATTACCAACAACAACAACAACAACA  
CATTACAATTACTATTTACAATTACAAAAAAAGTTAACATGGACAAGAAGTACAGCA  
TCGGCCTGGCCATCGGCACCAACTCTGTGGGCTGGGCCGTGATCACCGACGAGT  
ACAAGGTGCCAGCAAGAAATTCAAGGTGCTGGGCAACACCGACCGGCACAGCAT  
CAAGAAGAACCTGATCGGCGCCCTGCTGTTGACAGCGGAGAAACAGCCGAGGC  
CACCCGGCTGAAGAGAACCGCCAGAAGAAGATACACCAGACGGAAGAACCGGAT  
CTGCTATCTGCAAGAGATCTTCAGCAACGAGATGGCCAAGGTGGACGACAGCTTC  
TTCCACAGACTGGAAGAGTCCTTCTGGTGGAAAGAGGATAAGAAGCACGAGCGGC  
ACCCCATCTTCGGCAACATCGTGGACGAGGTGGCCTACCACGAGAAGTACCCAC  
CATCTACCACCTGAGAAAGAACTGGTGGACAGCACCGACAAGGCCGACCTGCGG  
CTGATCTATCTGGCCCTGGCCACATGATCAAGTTCCGGGGCCACTTCTGATCG  
AGGGCGACCTGAACCCCGACAACAGCGACGTGGACAAGCTGTTTCATCCAGCTGGT  
GCAGACCTACAACCAGCTGTTTCGAGGAAAACCCATCAACGCCAGCGGCGTGGAC  
GCCAAGGCCATCCTGTCTGCCAGACTGAGCAAGAGCAGACGGCTGGAAAATCTGA  
TCGCCAGCTGCCCGGCGAGAAGAAGAATGGCCTGTTCCGGCAACCTGATTGCCCT  
GAGCCTGGGCCTGACCCCAACTTCAAGAGCAACTTCGACCTGGCCGAGGATGC  
CAAAGTGCAGCTGAGCAAGGACACCTACGACGACGACCTGGACAACCTGCTGGCC  
CAGATCGGCGACCAAGTACGCCGACCTGTTTCTGGCCGCCAAGAACCTGTCCGACG  
CCATCCTGCTGAGCGACATCCTGAGAGTGAACACCGAGATCACCAAGGCCCCCT  
GAGCGCCTCTATGATCAAGAGATACGACGAGCACACCAGGACCTGACCCCTGCTG  
AAAGCTCTCGTGCGGCAGCAGCTGCCTGAGAAGTACAAAGAGATTTTCTTCGACC  
AGAGCAAGAACGGCTACGCCGGCTACATCGATGGCGGAGCCAGCCAGGAAGAGT  
TCTACAAGTTCATCAAGCCCATCCTGGAAAAGATGGACGGCACCGAGGAAGTCT  
CGTGAAGCTGAACAGAGAGGACCTGCTGCGGAAGCAGCGGACCTTCGACAACGG  
CAGCATCCCCACCAGATCCACCTGGGAGAGCTGCACGCCATTCTGCGGGCGGCA  
GGAAGATTTTTACCCATTCTGAAGGACAACCGGGAAAAGATCGAGAAGATCCTGA  
CCTTCCGCATCCCCTACTACGTGGGCCCTCTGGCCAGGGGAAACAGCAGATTCCG  
CTGGATGACCAGAAAGAGCGAGGAAACCATCACCCCTGGAACCTCGAGGAAGTG  
GTGGACAAGGGCGCCAGCGCCAGAGCTTCATCGAGCGGATGACCAACTTCGAT  
AAGAACCTGCCAACGAGAAGGTGCTGCCCAAGCACAGCCTGCTGTACGAGTACT  
TCACCGTGTACAACGAGCTGACCAAAGTGAAATACGTGACCGAGGGGAATGAGAAA  
GCCCGCCTTCTGAGCGGCGAGCAGAAAAAAGCCATCGTGGACCTGCTGTTCAAG  
ACCAACCGGAAAGTGACCGTGAAGCAGCTGAAAGAGGACTACTTCAAGAAAATCG  
AGTGCTTCGACTCCGTGGAAATCTCCGGCGTGGAAGATCGGTTCAACGCCTCCCT  
GGGCACATAACCAGATCTGCTGAAAATTATCAAGGACAAGGACTTCTGGACAATG  
AGGAAAACGAGGACATTCTGGAAGATATCGTGCTGACCCTGACACTGTTTGAGGA  
CAGAGAGATGATCGAGGAACGGCTGAAAACCTATGCCACCTGTTTCGACGACAAA  
GTGATGAAGCAGCTGAAGCGGCGGAGATACACCGGCTGGGGCAGGCTGAGCCG  
GAAGCTGATCAACGGCATCCGGGACAAGCAGTCCGGCAAGACAATCCTGGATTTC  
CTGAAGTCCGACGGCTTCGCCAACAGAACTTCATGCAGCTGATCCACGACGACA  
GCCTGACCTTTAAAGAGGACATCCAGAAAGCCAGGTGTCCGGCCAGGGCGATAG  
CCTGCACGAGCACATTGCCAATCTGGCCGGCAGCCCCGCCATTAAGAAGGGCATC  
CTGCAGACAGTGAAGGTGGTGGACGAGCTCGTGAAGTGATGGGCCGGCACAAG

CCCGAGAACATCGTGATCGAAATGGCCAGAGAGAACCAGACCACCCAGAAGGGA  
CAGAAGAACAGCCGCGAGAGAATGAAGCGGATCGAAGAGGGCATCAAAGAGCTG  
GGCAGCCAGATCCTGAAAGAACACCCCGTGGAAAACACCCAGCTGCAGAACGAGA  
AGCTGTACCTGTACTACCTGCAGAATGGGCGGGATATGTACGTGGACCAGGAACT  
GGACATCAACCGGCTGTCCGACTACGATGTGGACGCTATCGTGCCTCAGAGCTTT  
CTGAAGGACGACTCCATCGATAACAAAGTGCTGACTCGGAGCGACAAGAACCGGG  
GCAAGAGCGACAACGTGCCCTCCGAAGAGGTCGTGAAGAAGATGAAGAACTACTG  
GCGCCAGCTGCTGAATGCCAAGCTGATTACCCAGAGGAAGTTCGACAATCTGACC  
AAGGCCGAGAGAGGGCGCCTGAGCGAACTGGATAAGGCCGGCTTCATCAAGAGA  
CAGCTGGTGAAACCCGGCAGATCACAAAGCACGTGGCACAGATCCTGGACTCCC  
GGATGAACACTAAGTACGACGAGAACGACAACTGATCCGGGAAGTGAAAGTGAT  
CACCTGAAGTCCAAGCTGGTGTCCGATTTCCGGAAGGATTTCCAGTTTTACAAG  
TGCGCGAGATCAACAACACTACCACCACGCCACGACGCCTACCTGAACGCCGTCGT  
GGGAACCGCCCTGATCAAAAAGTACCCTAAGCTGGAAAGCGAGTTCGTGTACGGC  
GACTACAAGGTGTACGACGTGCGGAAGATGATCGCCAAGAGCGAGCAGGAAATC  
GGCAAGGCTACCGCCAAGTACTTCTTCTACAGCAACATCATGAACTTTTTCAAGAC  
CGAGATTACCCTGGCCAACGGCGAGATCCGGAAGCGGCCTCTGATCGAGACAAA  
CGGCGAAACAGGCGAGATCGTGTGGGATAAGGGCCGGGACTTTGCCACCGTGCG  
GAAAGTGCTGTCTATGCCCAAGTGAATATCGTGAAAAGACCGAGGTGCAGACA  
GGCGGCTTCAGCAAAGAGTCTATCCTGCCCAAGAGGAACAGCGACAAGCTGATCG  
CCAGAAAGAAGGACTGGGACCCTAAGAAGTACGGCGGCTTCGACAGCCCCACCG  
TGGCCTATTCTGTGCTGGTGGTGGCCAAAGTGGAAGGGCAAGTCCAAGAACT  
GAAGAGTGTGAAAGAGCTGCTGGGGATCACCATCATGGAAAGAAGCAGCTTCGAG  
AAGAATCCCATCGACTTTCTGGAAGCCAAGGGCTACAAAGAAGTGAAAAGGACCT  
GATCATCAAGCTGCCTAAGTACTCCCTGTTTCGAGCTGGAAAACGGCCGGAAGAGA  
ATGCTGGCCTCTGCCGGCGAACTGCAGAAGGGAAACGAACTGGCCCTGCCCTCC  
AAATATGTGAACTTCTGTACCTGGCCAGCCACTATGAGAAGCTGAAGGGCTCCC  
CCGAGGATAATGAGCAGAAACAGCTGTTTGTGGAACAGCACAAACACTACCTGGA  
CGAGATCATCGAGCAGATCAGCGAGTTCCTCCAAGAGAGTGATCCTGGCCGACGCT  
AATCTGGACAAGGTGCTGAGCGCCTACAACAAGCACAGAGACAAGCCTATCAGAG  
AGCAGGCCGAGAATATCATCCACCTGTTTACCCTGACCAATCTGGGAGCCCCTGC  
CGCCTTCAAGTACTTTGACACCACCATCGACCGGAAGAGGTACACCAGCACCAAA  
GAGGTGCTGGACGCCACCCTGATCCACCAGAGCATCACCGGCCTGTACGAGACA  
CGGATCGACCTGTCTCAGCTGGGAGGCGACGCC

TATCCCTATGACGTGCCCGATT  
ATGCCAGCCTGGGCAGCGGCTCCCCAAGAAAAACGCAAGGTGGAAGATCCTAA  
GAAAAAGCGGAAAGTGGAAGATGCTCCAAAGAAGAAGAGAAAGGTC

GACGGCATT  
GGTAGTGGGAGCAACGGCAGCAGCGGATCCAACGGTCCGACTGACGCCGCG  
GAA  
GAAGAAGTTCGAGCAAGAATTATCATCTTGAGAACGAAGTGGCTCGTCTTAAGAA  
AGGTTCTGGCAGTGGAGGTTCTGGCTCCGGAGGTTCCGGCGGGGAAGAAGTCT  
TTCAAAGAATTACCACCTGAAAATGAGGTAGCTAGACTGAAAAGGGGAGCGGA  
AGTGGGGGCTCCGGGTCGGGCGGCTCTGGGGGAGAGGAGTTGCTGAGCAAAAAT  
TATCATTGGAGAACGAAGTAGCACGACTAAAGAAAGGGTCCGGATCGGGTGGTT  
CAGGATCTGGAGGTTCCGGTGGGGAGGAGTTACTCTGAAAAATTATCATCTCGA  
AAACGAAGTGGCTCGGCTAAAAAGGGCAGTGGTTCTGGAGGATCTGGGTCCGG  
GGGATCCGGGGGTGAAGAGCTATTATCTAAAACTACCACCTCGAAAATGAGGTG  
GCACGCTTAAAAAGGGAAAGTGGCAGTGGTGGGTCGGGATCTGGCGGGTCCGGT

GGAGAAGAGCTACTATCCAAGAATTATCATCTTGAGAACGAGGTAGCGCGTTTGA  
GAAGGGTCCGGCTCAGGAGGATCTGGGTCAGGGGGCTCAGGAGGGGAGGAACT  
GCTCTCGAAGAACTATCATCTTGAAAATGAGGTCGCTCGATTA AAAAAGGGATCGG  
GCAGTGGTGGTCCGGCTCCGGTGGTTCGGGGGGCGAGGAACTACTTTCAAAGA  
ATTACCACCTCGAAAACGAAGTAGCTCGATTAAGAAAGGTTCAAGGTCGGGTGG  
CTCAGGTTCCGGAGGATCCGGCGGTGAAGAATTACTGAGTAAAATTATCATCTGG  
AAAATGAGGTAGCGAGACTAAAAAGGGGAGTGGTTCGGCGGTTCCGGGATCTGG  
CGGGTCGGGAGGGGAGGAATTGCTATCGAAAATTATCATCTTGAGAACGAAGTT  
GCTAGGCTCAAAAAGGGCTCAGGCTCAGGCGGGTCCGGGTCAGGGGGCTCAGGT  
GGCTAACCCGGGGGCGCGCCATGATAACTAGAGTCCTGCTTTAATGAGATATGCG  
AGACGCCTATGATCGCATGATATTTGCTTTCAATTCTGTTGTGCACGTTGTA AAAA  
CCTGAGCATGTGTAGCTCAGATCCTTACCGCCGGTTTCGGTTCATTCTAATGAATA  
TATCACCCGTTACTATCGTATTTTTATGAATAATATTCTCCGTTCAATTTACTGATTG  
TACCCTACTACTTATATGTACAATATTA AAAATGAAAACAATATATTGTGCTGAATAGG  
TTTATAGCGACATCTATGATAGAGCGCCACAATAACAAACAATTGCGTTTTATTATT  
ACAAATCCAATTTTAAAAAAGCGGCAGAACCGGTCAAACCTAAAAGACTGATTAC  
ATAAATCTTATTCAAATTTCAAAGTGCCCCAGGGGCTAGTATCTACGACACACCG  
AGCGGCGAACTAATAACGCTCACTGAAGGGA ACTCCGGTTCCCCGCCGGCGCGC  
ATGGGTGAGATTCTTGAAGTTGAGTATTGGCCGTCCGCTCTACCGAAAGTTACGG  
GCACCATTCAACCCGGTCCAGCACGGCGGGCGGTAACCGACTTGCTGCCCCGA  
GAATTATGCAGCATTTTTTTTGGTGTATGTGGGCCCCAAATGAAGTGCAGGTCAAAC  
CTTGACAGTGACGACAAATCGTTGGGCGGGTCCAGGGCGAATTTTGCGACAACAT  
GTCGAGGCTCAGCAGGACCGGCATGCAAGCTAGCTTACTAGTGATATTCTATAGT  
GTCACCTAAATCTGCGGC

**SunTagCACTA1g2-22aa-TET1cd**

**gRNA CACTA1g2**

**U6**

**NOS term**

**TET1cd**

**2xNLS**

**Linker**

**1xHA**

**sfGFP**

**scFV**

**UBQ10**

**Insulator**

**Omega RBC**

**dCAS9**

**3xNLS**

**GCN4 10x 22aa**

**OCS term**



AAAAAAGCACCGACTCGGTGCCACTTTTTCAAGTTGATAACGGACTAGCCTTATTT  
TAACTTGCTATTTCTAGCTCTAAAACCTACTGCTATCAATGAGGACCAATCACTACT  
TCGACTCTAGCTGTATATAAACTCAGCTTCGTTTTCTTATCTAAGCGATGTGGGACT  
TTTGAAGATTGTTTTCAACTAAATGGGCCTATATAAGAAATACTATTGTTCTTTCCC  
ATATAAATGGGCCTGCTTCTTCTTTTCAGATTCCCAGGGGCCTTTTGAAGATTATC  
TTCATATCTTAAGAATGAAGATGTTTTATTCAATCAAATTCTTGAAGGTTTCGATGCCT  
AATCATTCTAATCCTGGGACAACTATGAAACAAGATACAAAAACTCCGAATGGAAA  
GTTAAAAAGAAGAAAACGAAAGCTACGGTTCAAGAAAATGTAAGCTGATAAACAAA  
AAAAAACTGTATGAACGAAGAAGAAGAAAAAAGCTAAGAAGAAATGATGTATTGT  
GCGGAAGGCAAGTCGAGTTTCCGTTGTTCAACGAAAGCTTAAACGTAACATAGATG  
ACACCGCGCGCGATAATTTATCCTAGTTTGC GCGCTATATTTTGT TTTCTATCGCGT  
ATTAATGTATAATTGCGGGACTCTAATCATAAAAACCCATCTCATAAATAACGTCA  
TGCATTACATGTTAATTATTACATGCTTAACGTAATTCAACAGAAATTATATGATAAT  
CATCGCAAGACCGGCAACAGGATTCAATCTTAAGAACTTTATTGCCAAATGTTTGA  
ACGATCGGGGAAATTCGAGCTCAAACCTACGGCCATGGCGTAGGCGGCCTTTTCC  
GTTGTGATCTTCGCGGTCTCCTCCTTGTTTTGGACTAGTACCACCACCGCTACCA  
CCACCTTCGGTTACCGTGAAGGTTTTGGTAGCGTCGTCGTAGGTCCATTCACCGTC  
AACACCGTTGTCGTTAGCGTACTGTTTGAAAACCTTTTTCCGCGGTAGCAGCGTCAA  
CAGCTTCGGTGGTGGTTTACCTTTACGGGTTTTACCGTTCAGGATAAGCTTGTAC  
TCTTCGGTCCGAGATCCTCCTCCCGTACGTCAGACCCAATGGTTATAGGGCCCCG  
CAACGTGTGTGAGAGCATAAGGGGACACGGTGACAACATTGTCATGGGTTAATGT  
TAATGCTTTATGAGAAGGAATTTGGTTCAATTCATTTACTTCAGAGGACTGTTCTGG  
ACCTTCATTAGCTGCCTGGTCTTTTTGCTCTGAGGCCTTCATTTTCTTATTCTTAGCT  
TCTTTAGCCTCAAACCTTAATCTTGTTAGTTCAAACCATGTTGGGGCTTATTTAGGT  
TTTTGTGCTGGTAAAAGACAAGGGAGAGGGCGGGTTGGATGATTACGGTTGGGGTG  
CTCAACAGGAGTGGTAGCGTGCAGCTCTCGCCGGGCACACTCAATCAAACCGAG  
CCGTGAGCAGGTGCGATGGCCACCCACCAATATTTGCATCCAAAAGATGTGCT  
CACTGTCTGACCAATACTCATCAATGTGGGGCAATTTCTCCTCAGCAGGTGACAGG  
GGGTCATCAGATAGGGGTTCTGCTGATGGAGGCTCATCTGCTTCAGAATGCTGCT  
CATCTTCTTCCATTGGAGAAGAGGCAAGGTCTTGAGGAGAGGTGAGGAAGGAGGG  
CTGGTGGTTTGGCTGATGAGGCGTTAGCGGCTCAGTCACACCAGTGGAAGGCTCA  
GAATTAATGAGGGGCTCCATCACAGGAGCAGACAGGGTGGGGAGAGGAGCCACT  
TCGCCAAGCTGTGAAATGCCAGGGCCATCAGCAGCTGCAGCATTGGCACCCTGA  
GTCTTCCCGAAGGCATCGTACAGTGGGGAGTGCTGCTTCTTTCTGAAAACCCGCAT  
GAGGCTGTTGCGTCATTCTTCAGTGGAGCTGGTGTGGCTGAAGCAGTCTTCGGGG  
ACCAGGAGAAGCCTGGAGATGCCTCTTTCACTGGGTGAGGAGCGGATGGCATCA  
GCGAATAAGTTTTAGTGTTGTCTGAACTTTTTAAGATAAAATGGGGTTCGGTTTAC  
TTTTACTTCAGGTTGCACGGTCTCAGTGTTACTCCCTAAGGTTGGCAGTGACGAA  
GGCTTACTGTTGTTTGTGTTGTTGAGTTATTCTTCCGCTTGATTCCGGGGAATAGGT  
TTCTTTTCCACTGCCCTTATCTTATGTGCAAGAACCTCTGTCATCATCGCAGCCCTC  
TTCTTTCCAGAACGGGGAACAGGCTGAGTGAAACACGTTCTTTTTTTGCGGGCGGG  
GTGCCAGGACCTCGATGGCCCCAGATTTGATCTTGGCTTCCATTCCCTTCTTGGAG  
CCAAACTCATCTGTGTCTGAAAGCTTATAAAGAGGTAGCACATGGAGCTGCTCATC  
TTGAGGAATAACACCCAAAGAGCGGTTATCTTCTCGAGTTAAGGTACAAACCACAG  
TGCTTCCATTATTCATGTTGTGAATGTCCCTGTGGGGATGAGCACAGAAGTCCAGG  
CAAGCAGTGACCCAGAGAAGGGTCGACCTTCTTGCTGCCAAGCCGACATTCTC

GGGCAACATTTTCATATTCCACCTGATTTTGGTAAGCTACTGGAGCATACTGCTTAT  
AAATTGGAGCTAATCGTGTAGCCAAACTCTGTAAGTTATCTTCAAGGTTTTTTTCAT  
GTAAGGGAGAGCTTGATCAATTCTAAATCTTCTGGGGCTTGGGCTTCTACCAAAC  
TTACAGCCATTAAGTACATACTCCATGAACAGCCAAAAGAGAATGAAGCTCCACA  
AGTCTCTGGATCAATTCCTTGACATGTACAGGTACGATTTTCATTGAGGGTGCATCT  
TCTGTCCGTAGGGTGCCATTGTATGACTTTAGATTCTCTGTGAGCTCTGTGTATA  
GCCGGTCCGCCATTGGAAGAGGGATGCCATCCCACACCATGATGAGCACCACCAT  
CACAGCAGTTGGACAGTGGTGGCCTGTACGCTGCCGGACCAAACAAGAACTTTT  
TCTTCATCACTGCTTCTTCTTAAACCCACTTAGCAATTGGACACCCATGAGAGCTT  
TTCCCTTCTTACCGGTGTACACTACTATTTCTATCCTTATTGCGTTTCCTTTTTGAC  
CATACCTATTCTCCATGATTTCCCTGACAGCAGCAACACTTGGTCCTGCCCAAGG  
TGTGTATAATATGGGCCTTTGTCTTTTTGTATAACTCGATCAAGACAGCTGCAGGTG  
GGCAGCCCGGATCCGCCACCGCCACTTTCCGCTTTTTCTTAGGAGCTTCCACCTT  
GCGTTTTTCTTGGGAGCGCCGCTGCCAGGCTGGCATAATCGGGCACGTCATAG  
GGATACGTACGACCGGTCCGACCTCCACC TTGTAGAGCTCATCCATGCCATGTGT  
AATCCCAGCAGCAGTTACAAACTCAAGAAGGACCATGTGGTCACGCTTTTCGTTGG  
GATCTTTCGAAAGGACAGATTGTGTGACAGGTAATGGTTGTCTGGTAAAAGGACA  
GGGCCATCGCCAATTGGAGTATTTGTTGATAATGGTCTGCTAGTTGAACGGAACC  
ATCTTCAACGTTGTGGCGAATTTGAAGTTAGCTTTGATTCCATTCTTTGTTGTCT  
GCCGTGATGTATACATTGTGTGAGTTAAAGTTGACTCGAGTTTGTGTCCAAGAAT  
GTTCCATCTTCTTAAATCAATACCCTTAACTCGATACGATTAACAAGGGTATCA  
CCTTCAAACCTTGACTTCAGCACGCGTCTGTAGGTCCCGTCATCTTGAAAGATATA  
GTGCGTTCCTGTACATAACCTTCGGGCATGGCACTCTTGAAAAAGTCATGCCGTTT  
CATGTGATCCGGATAACGGGAAAAGCATTGAACACCATAGGTCAGAGTAGTGACA  
AGTGTGGCCACGGAACAGGTAGTTTCCAGTAGTGCAAATAAATTAAGGGTGAG  
TTTTCCGTTTGTAGCATCACCTCACCTCTCCACGGACAGAAAATTTGTGCCATT  
AACATACCATCTAATTCAACAAGAATTGGGACAACCTCCAGTGAAAAGTTCTTCTCC  
TTTGTACCGCTTCCACCTCCACCTGGATCCAA GCTTCCGCCGCCTCCTGAACCA  
CACCGCCACTACTCCTCCCCAGAACCTCCGCCTCACCAGCGTAATCTGGAAC  
ATCGTATGGGTAGCTGCTCACGGTCACCAGGGTGCCCTGGCCCCAGTAGTCGAAC  
AGGCCGGTCACGCAGTAGTACAGGGCGGTGTCGTGCTGCGCACCTTGCTCATCT  
GCAGGTACACGGTGTCTTGCCGTTGCTTGTGCTGATGATGAAGCGGTCCCTCAG  
GGCGCTGTTGTAGTCGGTGTGCGGTGCGCCAGATCACGCCGATCCACTCCAGG  
CCGCGGCCGGGGCCTGGCGCACCCAGTTCACGCCGTAGTCGGTCAGGCTGAA  
GCCGCTCACGGCGCAGCTCAGCTTACGGCTGCCGCCGGGCTGCACCAGGCCGCC  
GCCGCTCTCCAGCAGCTTACCTCGCTGCCGCCGCCGCTGCTGCCGCCGCCGCC  
GCTGCCGCCGCCGCCGCTGCCGCCGCCGCCGCGCTTACGCTCCACCTTGGTGCC  
CTGGCCGAACACCCAGTGGTTGCTGTACCACAGGGCGCAGAAGTAGGTGGCGAA  
GTCCTCGGGCTGCAGGCTGCTGATGGTCAGGGTGGCCTTGTGCGCCGATCAGGCT  
GCCGCTGAAGCGGCTGGGCACGCCGGGGGCGCGGTTGTTGGTGCCGCCGATCA  
GGCCCTTGAACAGCTTGCCGGGCTTCTCCTGCACCCAGCTGGCGTAGTTGCTGGT  
GGTCACGGCGCCGGTGTGCTGCGGCAGGTGATGGTCACGCGGTCCGCCACGCT  
GGCGCTCAGGCTGCTGGGGCTCTGGGTCATCACGATGTCGGGGCCCATAAACCC  
TAGGTGTTAATCAGAAAACTCAGATTAATCGACAAATTCGATCGCACAAACTAGAA  
ACTAACACCAGATCTAGATAGAAATCACAAATCGAAGAGTAATTATTCGACAAAAC  
CAAATTATTTGAACAAATCGGATGATATCTATGAAACCCTAATCGAGAATTAAGATG

ATATCTAACGATCAAACCCAGAAAATCGTCTTCGATCTAAGATTAACAGAATCTAAA  
CCAAAGAACATATACGAAATTGGGATCGAACGAAAACAAAATCGAAGATTTTGAGA  
GAATAAGGAACACAGAAATTTACCTTGATCACGGTAGAGAGAATTGAGAGAAAGTT  
TTTAAGATTTTGAGAAATTGAAATCTGAATTGTGAAGAAGAAGAGCTCTTTGGGTAT  
TGTTTTATAGAAGAAGAAGAAAAGACGAGGACGACTAGGTCACGAGAAAGCTA  
AGGCGGTGAAGCAATAGCTAATAATAAAATGACACGTGTATTGAGCGTTGTTTACA  
CGCAAAGTTGTTTTGGCTAATTGCCTTATTTTTAGGTTGAGGAAAAGTATTTGTGC  
TTTGAGTTGATAAACACGACTCGTGTGTGCCGGCTGCAACCACTTTGACGCCGTTT  
ATTACTGACTCGTCGACAACCACAATTTCTAACGGTCGTCATAAGATCCAGCCGTT  
GAGATTTAACGATCGTTACGATTTATATTTTTTAGCATTATCGTTTTATTTTTAAAT  
ATACGGTGGAGCTGAAAATTGGCAATAATTGAACCGTGGGTCCCCTGCATTGAAG  
CGTATTTTCGTATTTCTAGAATTCTTCGTGCTTTATTTCTTTTCCTTTTTGTTTTTT  
GCCATTTATCTAATGCAAGTGGGCTTATAAAATCAGTGAATTTCTTGAAAAGTAAC  
TTCTTTATCGTATAACATATTGTGAAATTATCCATTTCTTTAATTTTTTAGTGTTATT  
GGATATTTTTGTATGATTATTGATTGCATAGGATAATGACTTTTGATCAAGTTGGT  
GAACAAGTCTCGTTAAAAAAGGCAAGTGGTTGGTGAICTGATTTATTCTTGTTATT  
TAATTCATATATCAATGGATCTTATTTGGGGCCTGGTCCATATTAACACTCGTGTT  
CAGTCCAATGACCAATAATTTTTTCATTAATAACAATGTAACAAGAATGATACACA  
AAACATTTCTTGAATAAGTTCGCTATGAAGAAGGGAAGTATCCGGTCCCTAGATCAT  
CAGTTCATACAAACCTCCATAGAGTTCAACATCTTAAACAAGAATATCCTGATCTGA  
AGAATGTGGAGGCTTTAGTCCCTTGATACTTGGGAGGCTGTGGAAGAACAGAAA  
CGAGCTGGTGCTTAAAGGGAGGGAATTTGGAACCAATGAGGTATTAGTAAGGACA  
CAAGAAGATGCAGATGAGTGGATTAGAAGGAAAGAGGCTCAGAATGTAAGGAAAG  
CACCAACCACAACACCGTCCGGACAGACGAGAAACATGGGAAGCTCCACCACAAT  
CTTGGGTTAAGTGCAACTTTGATGGGGCATGGCCAACAGAAGGATTAATGTGG  
CTTAGGGTGGGTGCTTCGCGATCATAACAGGGAAGGTGTTATGGTTAGGTGCAAGA  
GCTGTGGTAAAAGTAAGAAGCGTGCTGGAAGTAGAAGTGGAGGCTCTTAGATGGG  
CTGTGCTGTCATTATCCCGATTCAATTATAGGAAGATCATTTTTGAGGTGGATTCTC  
AGCAACTTGTGTCTTTGGTTACATGAAAGTTATGCTTGTCAAGTCTCAATCCAATTA  
TCCAAGACATAAAGTATCTACTTAGCAAGTTTGAGGATTTTATGCTTGTGCATACAA  
GCCGAGAAGGAAATGGAGTGGCAGATAGAATAGCTAAGGAATCTCTTTCTTTGAG  
AATTATGATCTAAAGTTGTATTCTATTGTACCAATTTGGGTTAAAAGCTCTGTTGAGC  
TAGACTCATATGCATCCTAGGAAACAAAGTTGTAATGAGTTGCTGGCCTCTCTTGGG  
ATTGTTCAATCAAAGTAGCTGTCCCTACACACCACAACAGAATGGTGTGTTGGAGAG  
AAAGCACAGACACATCCTTGAGATGGCAAGGGCACTTAAGTTTCAGAGTGGTGTAC  
CTACCAGGTTTTGGGGAGACTGTGTCAAGACTGTTGTATACCTGATCAATAGACTC  
CCTACTCCAATCTTACAAGGCAAATGTCCATATGAACTACTCTATCAGAAACATGCC  
AAGCTTGATCACTTGAGAGTGTGTTGGGTGTCTTGCTTTTGCAGCAACACTGCCCAA  
AGGTGACAAACTTGCACCTAGAGCCAAGCGAACCATCTTCATTGGTTATTCTGAGA  
CTCAAAGGGTTACAGGTTGTATGACTTGGATAATAAGGTGATCATAGTGAGCAGG  
GATGTAGTTTTTACAGAGAGTTTCAGTTCCCTTTCAAAGAGTCCATCTCCCATGAACCT  
GATATGTTCACTCGAGCAGGTTCACTTAGCTCTGAAGATACAGCTTTGCAGCTAGT  
GTATAATGATATTTTTCTTCCAGCTTTCATACTGATGATGATGATACTCCAGTTCTT  
ATTCTGACATTGTAGAGGCCAATGAGGATATCACTTTGGGGACTCATTCTACCCA  
AAATCATATCACTTCAGCTGATGCTGCACCTTCAGGCCACCTGCATGCTCCTGCAG  
AGTCAGTTGAGTCAGCTGAGCCTGACCTAGCAAATGCTGAATTTGAGCACCATACT

GCTGTAGCTGATCCCTCTCTAGTTCCAGCAAACCTGCACACTAGACCTAAACGCAA  
TGCAGGTCCTCCCATCTGGCTCAAGGACTTTGTGACACTGAACAAAGGCTCTAGG  
GATGTTCCATACCCTATAGCCAACCTATGTTTCCTATGATCACTTGCCTGTTCACTAT  
CAAGCTTATTTGAGTGCTTTCTCCACTTATACTGAACCTAAATCCTTCAAAGAAGCA  
GCTCAAGATGAGAAATGGATGGAGGCCATGTCCCTTGAGATACAGGCTCTTGAGG  
ATAATAACACCTGGGAGATTGTCCCTTTACCCCCTGGTAAACAGCCTATAGGGTCC  
AAATGGGTGTACAAAATTAATAACAAAGCTAATGGTGAAGTTGACAGGTTTAAGGC  
AAGGCTAGTGGCCAAGGGATACACTCAGCAAGAAGGCCTTGACTACCATGAAACT  
TTTTCTCCAGTGGCCAAAATGGTCACTGTAAAAGCTGTCATATCTGTTGCTGCTTCC  
AAGGGCTGGTTCCTTTTCCAGATGGATGTCAACAATGCTTTTCTACAAGGTGACCT  
CATGGAAGAAGTTTATATGTCTCTGCCTCAGGGTTTTACAGCCAAGGGGAGACCA  
AAGTGTGCAGGCTGTTGAATCCCTCTATGGTTTAAAGCAAGCATCAAGGCAGTGGA  
ACATCAAGCTTACCACTGTCCTTATGCAGGCTGGTTTTATGCAAAGTGCTTATGATC  
ACTCCTTGTTTACCAAAGAGAGGGGACTGACCTTGTGATAATCCTGATTTATGTG  
GATGATCTGTTAATAACAGGCAGCAGCAATGTTTTGATTCAGAAGCAAAGGCAAC  
CCTGCATCAGCATTTCAGATGAAAGATTTGGGAGAACTAAAATACTTCTTAGGCAT  
TGAGGTGCTGAGATCAGAAAAGGGAATCCTACTGAACCAGAGGAAGTATGCACTG  
GAACTGATATCAGGTGTTGGTCTGGGAGGCTGCAGACCAGTGTCAACCCCAATGG  
AACAGAACCAAAGGCTGACTACTGTAGAATATGACAAGCACTTAGGAAAGACTGAT  
GATGCAGAGTTAGAGGATGTGGGTTCTATCAGAGACTGGTGGGAAAGCTTCTCT  
ACTTGACAATCACAAGGCCAGATATCAGCTTTGCAGTGCAGGTGCTGAGTCAATTC  
ATGCAGCAACCCAAACAGTCACACCTGGAAGCAGCATTGAGGGTTGTGAAGTACA  
TAAAAGGTTCTCCAGGTGTTAGGAAAGCGGCCGCATGCATATGAGTCTAGCTCAACA  
GAGCTTTTAAACCCAAATTGGTACAATAGAATACAACCTTTAGATCATAATTCTCAAAA  
GAAAGAGATTCTTAGCTATTCTATCTGCCACTCCATTTCTTCTCGGCTTGTATGC  
ACAAGCATAAAAATCCTCAAACCTTGCTAAGTAGATACTTTATGTCTTGGATAAATTGGA  
TTGAGACTTGACAAGCATAACTTTTCATGTAACCAAAGACACAAGTTGCTGAGAATC  
CACCTCAAAAATGATCTTCTTATAATTGAATCGGGATAATGACAGCACAGCCCATCT  
AAGAGCCTCCACTTCTACTTCCAGCACGCTTCTTACTTTTACCACAGCTCTTGCACC  
TAACCATAACACCTTCCCTGTATGATCGCGAAGCACCCACCCTAAGCCACATTTTA  
ATCCTTCTGTTGGCCATGCCCCATCAAAGTTGCACTTAACCCAAGATTGTGGTGGAA  
GCTTCCCATGTTTCTCGTCTGTCCCACGGTGTGTTGGTGGTGCCTTCCCTTACAT  
TCTGAGCCTCTTTCTTCTAATCCACTCATCTGCATCTTCTTGTGTCCTTACTAATAC  
CTCATTGGTTCCAAATTCCCTCCCTTTAAGCACCAGCTCGTTTCTGTTCTTCCACAG  
CCTCCCAAGTATCCAAGGGACTAAAGCCTCCACATTCTTCAGATCAGGATATTCTT  
GTTAAGATGTTGAACTCTATGGAGGTTTGTATGAACTGATGATCTAGGACCGGAT  
AAGTTCCTTCTTCATAGCGAACTTATTCAAAGAATGTTTTGTGTATCATTCTTGTTA  
CATTGTTAATAATGAAAAAATATTATTGGTCATTGGACTGAACACGAGTGTTAAATAT  
GGACCAGGCCCAAATAAGATCCATTGATATATGAATTAATAACAAGAATAAATCG  
AGTCACCAAACCACTTGCCTTTTTAAACGAGACTTGTTCCACCAACTTGATACAAAAG  
TCATTATCCTATGCAAATCAATAATCATACAAAATATCCAATAACACTAAAAAATTA  
AAAGAAATGGATAATTTACAATATGTTATACGATAAAGAAGTTACTTTTCCAAGAAA  
TTCACTGATTTTATAAGCCCACTTGCATTAGATAAATGGCAAAAAAAAAACAAAAAGG  
AAAAGAAATAAAGCACGAAGAATTCTAGAAAATACGAAATACGCTTCAATGCAGTG  
GGACCCACGGTTCAATTATTGCCAATTTTCAGCTCCACCGTATATTTAAAAAATAAA  
ACGATAATGCTAAAAAAATATAAATCGTAACGATCGTTAAATCTCAACGGCTGGATC

TTATGACGACCGTTAGAAATTGTGGTTGTCGACGAGTCAGTAATAAACGGCGTCAA  
AGTGGTTGCAGCCGGCACACACGAGTCGTGTTTATCAACTCAAAGCACAAATACTT  
TTCTCAACCTAAAAATAAGGCAATTAGCCAAAAACAACCTTTGCGTGTAACAACGC  
TCAATACACGTGTCATTTTATTATTAGCTATTGCTTACCAGCCTTAGCTTTCTCGTGA  
CCTAGTCGTCCCTCGTCTTTTCTTCTTCTTCTATAAAAACAATACCCAAAGAGCTCT  
TCTTCTCACAATTCAGATTTCAATTTCTCAAATCTTAAAAACTTTCTCTCAATTCTC  
TCTACCGTGATCAAGGTAATTTCTGTGTTCCCTTATTCTCTCAAATCTTCGATTTTG  
TTTTCGTTCGATCCCAATTCGTATATGTTCTTTGGTTTAGATTCTGTTAATCTTAGA  
TCGAAGACGATTTTCTGGGTTTGATCGTTAGATATCATCTTAATTCTCGATTAGGGT  
TTCATAGATATCATCCGATTTGTTCAAATAATTTGAGTTTTGTGAATAAATACTCTT  
CGATTTGTGATTTCTATCTAGATCTGGTGTAGTTTCTAGTTTGTGCGATCGAATTT  
GTCGATTAATCTGAGTTTTTCTGATTAACAGGGATCATCAACAAGTTTGTACAAAA  
AGCAGGCTCTTTAAAGTATTTTTACAACAATTACCAACAACAACAACAACAACA  
CATTACAATTACTATTTACAATTACAAAAAAAGTTAACATGGACAAGAAGTACAGCA  
TCGGCCTGGCCATCGGCACCAACTCTGTGGGCTGGGCCGTGATCACCAGCAGT  
ACAAGGTGCCAGCAAGAAATTCAAGGTGCTGGGCAACACCGACCGGCACAGCAT  
CAAGAAGAACCTGATCGGCGCCCTGCTGTTTCGACAGCGGAGAAACAGCCGAGGC  
CACCCGGCTGAAGAGAACC GCCAGAAGAAGATACACCAGACGGAAGAACC GGAT  
CTGCTATCTGCAAGAGATCTTCAGCAACGAGATGGCCAAGGTGGACGACAGCTTC  
TTCCACAGACTGGAAGAGTCCTTCTGTTGGAAGAGGATAAGAAGCACGAGCGGC  
ACCCCATCTTCGGCAACATCGTGGACGAGGTGGCCTACCACGAGAAGTACCCAC  
CATCTACCACCTGAGAAAGAACTGGTGGACAGCACCGACAAGGCCGACCTGCGG  
CTGATCTATCTGGCCCTGGCCACATGATCAAGTTCCGGGGCCACTTCTGATCG  
AGGGCGACCTGAACCCCGACAACAGCGACGTGGACAAGCTGTTTCATCCAGCTGGT  
GCAGACCTACAACCAGCTGTTTCGAGGAAAACCCCATCAACGCCAGCGGCGTGGAC  
GCCAAGGCCATCCTGTCTGCCAGACTGAGCAAGAGCAGACGGCTGGAAAATCTGA  
TCGCCAGCTGCCCGGCGAGAAGAAGAATGGCCTGTTTCGGCAACCTGATTGCCCT  
GAGCCTGGGCCTGACCCCAACTTCAAGAGCAACTTCGACCTGGCCGAGGATGC  
CAAACCTGCAGCTGAGCAAGGACACCTACGACGACGACCTGGACAACCTGCTGGCC  
CAGATCGGCGACCAGTACGCCGACCTGTTTCTGGCCGCCAAGAACCTGTCCGACG  
CCATCCTGCTGAGCGACATCCTGAGAGTGAACACCGAGATCACCAAGGCCCCCT  
GAGCGCCTCTATGATCAAGAGATACGACGAGCACACCAGGACCTGACCTGCTG  
AAAGCTCTCGTGCGGCAGCAGCTGCCTGAGAAGTACAAAGAGATTTTCTTCGACC  
AGAGCAAGAACGGCTACGCCGGCTACATCGATGGCGGAGCCAGCCAGGAAGAGT  
TCTACAAGTTCATCAAGCCATCCTGGAAAAGATGGACGGCACCGAGGAAGTACTGCT  
CGTGAAGCTGAACAGAGAGGACCTGCTGCGGAAGCAGCGGACCTTCGACAACGG  
CAGCATCCCCACCAGATCCACCTGGGAGAGCTGCACGCCATTCTGCGGCGGCA  
GGAAGATTTTACCATTCTGAAGGACAACCGGGAAAAGATCGAGAAGATCCTGA  
CCTTCCGCATCCCCTACTACGTGGGCCCTCTGGCCAGGGGAAACAGCAGATTCGC  
CTGGATGACCAGAAAGAGCGAGGAAACCATCACCCCTGGAACCTTCGAGGAAGTG  
GTGGACAAGGGCGCCAGCGCCAGAGCTTCATCGAGCGGATGACCAACTTCGAT  
AAGAACCTGCCAACGAGAAGGTGCTGCCAACGACAGCCTGCTGTACGAGTACT  
TCACCGTGTAACGAGCTGACCAAAGTGAATACGTGACCGAGGGAATGAGAAA  
GCCCGCCTTCTGAGCGGCGAGCAGAAAAAGCCATCGTGGACCTGCTGTTCAAG  
ACCAACCGGAAAGTGACCGTGAAGCAGCTGAAAGAGGACTACTTCAAGAAAATCG  
AGTGCTTCGACTCCGTGAAATCTCCGGCGTGGAAAGATCGGTTCAACGCCTCCCT

GGGCACATACCACGATCTGCTGAAAATTATCAAGGACAAGGACTTCCTGGACAATG  
AGGAAAACGAGGACATTCTGGAAGATATCGTGCTGACCCTGACACTGTTTGAGGA  
CAGAGAGATGATCGAGGAACGGCTGAAAACCTATGCCACCTGTTTCGACGACAAA  
GTGATGAAGCAGCTGAAGCGGCGGAGATACACCGGCTGGGGCAGGCTGAGCCG  
GAAGCTGATCAACGGCATCCGGGACAAGCAGTCCGGCAAGACAATCCTGGATTTC  
CTGAAGTCCGACGGCTTCGCCAACAGAACTTCATGCAGCTGATCCACGACGACA  
GCCTGACCTTTAAAGAGGACATCCAGAAAGCCCAGGTGTCCGGCCAGGGCGATAG  
CCTGCACGAGCACATTGCCAATCTGGCCGGCAGCCCCGCCATTAAGAAGGGCATC  
CTGCAGACAGTGAAGGTGGTGGACGAGCTCGTGAAAGTGATGGGCCGGCACAAG  
CCCGAGAACATCGTGATCGAAATGGCCAGAGAGAACCAGACCACCCAGAAGGGA  
CAGAAGAACAGCCGCGAGAGAATGAAGCGGATCGAAGAGGGCATCAAAGAGCTG  
GGCAGCCAGATCCTGAAAGAACACCCCGTGGAAAACACCCAGCTGCAGAACGAGA  
AGCTGTACCTGTACTACCTGCAGAATGGGCGGGATATGTACGTGGACCAGGA  
GGACATCAACCGGCTGTCCGACTACGATGTGGACGCTATCGTGCCTCAGAGCTTT  
CTGAAGGACGACTCCATCGATAACAAAGTGCTGACTCGGAGCGACAAGAACCGGG  
GCAAGAGCGACAACGTGCCCTCCGAAGAGTCTGTGAAGAAGATGAAGAACTACTG  
GCGCCAGCTGCTGAATGCCAAGCTGATTACCCAGAGGAAGTTCGACAATCTGACC  
AAGGCCGAGAGAGGGCGGCTGAGCGAACTGGATAAGGCCGGCTTCATCAAGAGA  
CAGCTGGTGGAAACCCGGCAGATCACAAAGCACGTGGCACAGATCCTGGACTCC  
GGATGAACACTAAGTACGACGAGAACGACAACTGATCCGGGAAGTGAAAGTGAT  
CACCTGAAGTCCAAGCTGGTGTCCGATTTCCGGAAGGATTTCCAGTTTTACAAG  
TGCGCGAGATCAACAACCTACCACGCCCACGACGCCTACCTGAACGCCGTCGT  
GGGAACCGCCCTGATCAAAAAGTACCCTAAGCTGGAAAGCGAGTTCGTGTACGGC  
GACTACAAGGTGTACGACGTGCGGAAGATGATCGCCAAGAGCGAGCAGGAATC  
GGCAAGGCTACCGCCAAGTACTTCTTCTACAGCAACATCATGAACTTTTTCAAGAC  
CGAGATTACCCTGGCCAACGGCGAGATCCGGAAGCGGCCTCTGATCGAGACAAA  
CGGCGAACAGGGCGAGATCGTGTGGGATAAGGGCCGGGACTTTGCCACCGTGCG  
GAAAGTGCTGTCTATGCCCAAGTGAATATCGTGAAAAGACCGAGGTGCAGACA  
GGCGGCTTCAGCAAAGAGTCTATCCTGCCCAAGAGGAACAGCGACAAGCTGATCG  
CCAGAAAGAAGGACTGGGACCCTAAGAAGTACGGCGGCTTCGACAGCCCCACCG  
TGGCCTATTCTGTGCTGGTGGTGGCCAAAGTGGAAAAGGGCAAGTCCAAGAACT  
GAAGAGTGTGAAAGAGCTGCTGGGGATCACCATCATGGAAAGAAGCAGCTTCGAG  
AGAATCCCATCGACTTTCTGGAAGCCAAGGGCTACAAAGAAGTGA AAAAGGACCT  
GATCATCAAGCTGCCTAAGTACTCCCTGTTTCGAGCTGGAAAACGGCCGGAAGAGA  
ATGCTGGCCTCTGCCGGCGAACTGCAGAAGGGAAACGAACTGGCCCTGCCCTCC  
AAATATGTGAACTTCTGTACCTGGCCAGCCACTATGAGAAGCTGAAGGGCTCCC  
CCGAGGATAATGAGCAGAAACAGCTGTTTGTGGAACAGCACAAACACTACCTGGA  
CGAGATCATCGAGCAGATCAGCGAGTTCTCCAAGAGAGTGATCCTGGCCGACGCT  
AATCTGGACAAGGTGCTGAGCGCCTACAACAAGCACAGAGACAAGCCTATCAGAG  
AGCAGGCCGAGAATATCATCCACCTGTTTACCCTGACCAATCTGGGAGCCCCTGC  
CGCCTTCAAGTACTTTGACACCACCATCGACCGGAAGAGGTACACCAGCACCAA  
GAGGTGCTGGACGCCACCCTGATCCACCAGAGCATCACCGGCCTGTACGAGACA  
CGGATCGACCTGTCTCAGCTGGGAGGCGACGCC TATCCCTATGACGTGCCCGATT  
ATGCCAGCCTGGGCAGCGGCTCCCCAAGAAAAAACGCAAGGTGGAAGATCCTAA  
GAAAAAGCGGAAAGTGGAAGATGCTCCAAAGAAGAAGAGAAAGGTC GACGGCATT  
GGTAGTGGGAGCAACGGCAGCAGCGGATCCAACGGTCCGACTGACGCCGCG GAA

GAAGAACTTTT GAGCAAGAATTATCATCTTGAGAACGAAGTGGCTCGTCTTAAGAA  
AGGTTCTGGCAGTGGAGGTTCTGGCTCCGATCTGGTGGTTCGGGCTCAGGCGG  
GTCCGATCAGGCGAAGAAGTCTTTCAAAGAATTACCACCTGAAAATGAGGTA  
GCTAGACTGAAAAAGGGGAGCGGAAGTGGGGGCTCCGGGTCGGGCTCAGGGGG  
CTCCGGTTCGGGAGGCTCAGGGTCCGGGGAGGAGTTGCTGAGCAAAAATTATCAT  
TTGGAGAACGAAGTAGCACGACTAAAGAAAGGGTCCGGATCGGGTGGTTCAGGAT  
CTGGATCCGGAGGATCAGGGTCCGGTGGGTCCGGCTCAGGAGAGGAGTTACTCT  
CGAAAATTATCATCTCGAAAACGAAGTGGCTCGGCTAAAAAAGGGCAGTGGTTCT  
GGAGGATCTGGGTCCGGGTCAGGCGGGTCTGGATCTGGGGGATCTGGATCTGGT  
GAAGAGCTATTATCTAAAAACTACCACCTCGAAAATGAGGTGGCACGCTTAAAAAA  
GGGAAGTGGCAGTGGTGGGTCCGGATCTGGCTCTGGTGGCTCAGGCTCCGGGAGG  
TTCAGGTTCCGGGGAAGAGCTACTATCCAAGAATTATCATCTTGAGAACGAGGTA  
CGCGTTTGAAGAAGGGTTCGGGCTCAGGAGGATCTGGGTCCAGGGTCCAGGGGGT  
CCGGGTCAGGCGGGTCCGGGTCAGGCGAGGAACTGCTCTCGAAGAACTATCATC  
TTGAAAATGAGGTCGCTCGATTAAAAAAGGGATCGGGCAGTGGTGGGTCCGGCTC  
CGGTTCCGGAGGATCGGGATCTGGGGGCTCCGGATCCGGGGAGGAACTACTTTC  
AAAGAATTACCACCTCGAAAACGAAGTAGCTCGATTAAAGAAAGGTTCCAGGGTCGG  
GTGGCTCAGGTTCCGGATCAGGTGGGTCCAGGCTCCGGTGGTTCAGGTTCCGGGAG  
AGAATTACTGAGTAAAAATTATCATCTGGAAAATGAGGTAGCGAGACTAAAAAAG  
GGGAGTGGTTCTGGCGGTTCCGGATCTGGCTCTGGGGGCTCTGGGTCCGGGAGGG  
TCTGGGTCTGGCGAGGAATTGCTATCGAAAATTATCATCTTGAGAACGAAGTTGC  
TAGGCTCAAAAAGGGCTCAGGCTCAGGCGGGTCCGGGTCAGGGTCCGGGAGGTTCC  
CGGATCCGGGGGATCAGGCTCAGGGTAA<sup>CCC</sup>GGGGGCGCGCCATGATAAC<sup>TAGA</sup>  
GTCCTGCTTTAATGAGATATGCGAGACGCCTATGATCGCATGATATTTGCTTTCAAT  
TCTGTTGTGCACGTTGTAACCACTGAGCATGTGTAGCTCAGATCCTTACCGCCG  
GTTTCGGTTCATTCTAATGAATATATCACCCGTTACTATCGTATTTTTATGAATAATA  
TTCTCCGTTCAATTTACTGATTGTACCCTACTACTTATATGTACAATATTAATGAA  
AACAAATATATTGTGCTGAATAGGTTTATAGCGACATCTATGATAGAGCGCCACAATA  
ACAAACAATTGCGTTTTATTATTACAAATCCAATTTAAAAAAGCGGCAGAACC GG  
TCAAACCTAAAAGACTGATTACATAAATCTTATTCAAATTTCAAAGTGCCCCAGGG  
GCTAGTATCTACGACACACCGAGCGGCGAATAAACGCTCACTGAAGGGA ACT  
CCGGTTCGCCCGCGCGCATGGGTGAGATTCTTGAAGTTGAGTATTGGCCGT  
CCGCTCTACCGAAAGTTACGGGCACCATTCAACCCGGTCCAGCACGGCGGCCGG  
GTAACCGACTTGCTGCCCGAGAATTATGCAGCATTTTTTTGGTGTATGTGGGCC  
CAAATGAAGTGCAGGTCAAACCTTGACAGTGACGACAAATCGTTGGGCGGGTCCA  
GGGCGAATTTGCGACAACATGTCGAGGCTCAGCAGGACCGGCATGCAAGCTAGC  
TTACTAGTGATATTCTATAGTGTACCTAAATCTGCGGC

**SunTagng-22aa**

**NOS term**

**TET1cd**

**2xNLS**

**Linker**

**1xHA**

sfGFP  
scFV  
UBQ10  
Insulator  
Omega RBC  
dCAS9  
3xNLS  
GCN4 10x 22aa  
OCS term

CACGGGGTGGTTTGGTTTAAACGTAACATAGATGACACCGCGCGCGATAATTTATC  
CTAGTTTGCGCGCTATATTTTGTCTATCGCGTATTAATGTATAATTGCGGGAC  
TCTAATCATAAAAACCCATCTCATAAATAACGTCATGCATTACATGTTAATTATTACA  
TGCTTAACGTAATTCAACAGAAATTATATGATAATCATCGCAAGACCGGCAACAGG  
ATTCAATCTTAAGAACTTTATTGCCAAATGTTTGAACGATCGGGGAAATTCGAGCT  
CAAACCTACGGCCATGGCGTAGGCGGCCTTTTCCGTTGTGATCTTCGCGGTCTCCT  
CCTTGTTTTTGGACTAGTACCACCACCGCTACCACCACCTTCGGTTACCGTGAAGG  
TTTTGGTAGCGTCGTCGTAGGTCCATTACCGTCAACACCGTTGTCGTTAGCGTAC  
TGTTTGAACCTTTTCCGCGGTAGCAGCGTCAACAGCTTCGGTGGTGGTTTCACC  
TTTCAGGGTTTTACCGTTCAGGATAAGCTTGTACTCTTCGGTCCGAGATCCTCCTC  
CCGTACGTCAGACCCAATGGTTATAGGGCCCCGCAACGTGTGTGAGAGCATAAAGG  
GGACACGGTGACAACATTGTCATGGGTTAATGTTAATGCTTTATGAGAAGGAATTT  
GGTTCAATTCATTTACTTCAGAGGACTGTTCTGGACCTTCATTAGCTGCCTGGTCTT  
TTTGCTCTGAGGCCTTCATTTTCTTATTCTTAGCTTCTTTAGCCTCAAACCTAATCTT  
GTTTAGTTCAAACCATGTTGGGGCTTATTTAGGTTTTTGTGCTGGTAAAAGACAAG  
GGAGAGGCGGGTGGATGATTACGGTTGGGGTGCTCAACAGGAGTGGTAGCGTG  
CAGCTCTCGCCGGGCACACTCAATCAAACCGAGCCGTGAGCAGGTGCGATGGC  
CACCCACCAATATTTGCATCCAAAAGATGTGCTCACTGTCTGACCAATACTCATC  
AATGTGGGGCAATTTCTCCTCAGCAGGTGACAGGGGGTCATCAGATAGGGGTTTCG  
TCTGATGGAGGCTCATCTGCTTCAGAATGCTGCTCATCTTCTTCCATTGGAGAAGA  
GGCAAGGTCTTGAGGAGAGGTGAGGAAGGAGGGCTGGTGGTTTGGCTGATGAGG  
CGTTAGCGGCTCAGTCACACCAGTGAAGGCTCAGAATTAATGAGGGGCTCCATC  
ACAGGAGCAGACAGGGTGGGGAGAGGAGCCACTTCGCCAAGCTGTGAAATGCCA  
GGCCATCAGCAGCTGCAGCATTGGCACCCTGAGTCTTCCCGAAGGCATCGTAC  
AGTGGGGAGTGCTGCTTCTTTCTGAAAACCCGCATGAGGCTGTTGCGTCATTCTTC  
AGTGGAGCTGGTGTGGCTGAAGCAGTCTTCGGGGACCAGGAGAAGCCTGGAGAT  
GCCTCTTTCACTGGGTGAGGAGCGGATGGCATCAGCGAATAAGTTTTAGTGTGTC  
TGAACTTTTAAGATAAAATGGGGTTCGGTTTCACTTTTTACTTCAGGTTGCACGGT  
CTCAGTGTTACTCCCTAAGGTTGGCAGTGACGAAGGCTTACTGTTGTTTGTGTTG  
TTGAGTTATTCTTCGCTTGATTCCGGGAATAGGTTTCTTTTCCACTGCCCTTATCT  
TATGTGCAAGAACCTCTGTCATCATCGCAGCCCTCTTCTTCCAGAACGGGGAACA  
GGCTGAGTGAAACACGTTCTTTTTTTCGGCGGGGTGCCAGGACCTCGATGGCCC  
CAGATTTGATCTTGGCTTCCATTCTTCTTGGAGCCAACTCATCTGTGTCTGAAA  
GCTTATAAAGAGGTAGCACATGGAGCTGCTCATCTTGAGGAATAACACCCAAAGAG



CGGTTATCTTCTCGAGTTAAGGTACAAACCACAGTGCTTCCATTATTCATGTTGTGA  
ATGTCCCTGTGGGGATGAGCACAGAAGTCCAGGCAAGCAGTGACCCAGAGAAG  
GGTCGACCTTCCTTGCTGCCAAGCCGACATTCTCGGGCAACATTTTCATATTCCAC  
CTGATTTTGGTAAGCTACTGGAGCATACTGCTTATAAATTGGAGCTAATCGTGTAGC  
CAAACCTCTGTAAGTTATCTTCAAGGTTTTTTTCATGTAAGGGAGAGCTTGGATCAAT  
TCTAAATCTTCTGGGGCTTGGGCTTCTACCAAACCTTACAGCCATTAAGTACATACT  
CCATGAACAGCCAAAAGAGAATGAAGCTCCACAAGTCTCTGGATCAATTCCTTGAC  
ATGTACAGGTACGATTTTCATTGAGGGTGCATCTTCTGTGCGGTAGGGTGCCCATTG  
TATGACTTTAGATTCTCTGTGAGCTCTGTGTATAGCCGGTCGGCCATTGGAAGAGG  
GATGCCATCCCACACCATGATGAGCACCACCATCACAGCAGTTGGACAGTGGTGG  
CCTGTACGCTGCCGGACCAAACAAGAACTTTTTCTTCATCACTGCTTCTTCTAAA  
ACCCACTTAGCAATTGGACACCCATGAGAGCTTTTCCCTTCTTACCGGTGTACAC  
TACTATTTCTATCCTTATTGCGTTTTCTTTTTGACCATACCTATTCTCCATGATTTCC  
CTGACAGCAGCAACACTTGGTCCTGCCCAAGGTGTGTATAATATGGGCCTTTGTCT  
TTTTGTATAACTCGATCAAGACAGCTGCAGGTGGGCAGCCCGGATCCGCCACCG  
CCCACTTTCCGCTTTTTCTTAGGAGCTTCCACCTTGCCTTTTTCTTGGGAGCGCC  
GCTGCCCAGGCTGGCATAATCGGGCACGTCATAGGGATAACGTACGACCGGTCCG  
ACCTCCACCCTTGTAGAGCTCATCCATGCCATGTGTAATCCAGCAGCAGTTACAA  
ACTCAAGAAGGACCATGTGGTCACGCTTTTCGTTGGGATCTTTCGAAAGGACAGAT  
TGTGTGCACAGGTAATGGTTGTCTGGTAAAAGGACAGGGCCATCGCCAATTGGAG  
TATTTTGTGATAATGGTCTGCTAGTTGAACGGAACCATCTTCAACGTTGTGGCGAA  
TTTTGAAGTTAGCTTTGATTCCATTCTTTGTTTGTCTGCCGTGATGTATACATTGTG  
TGAGTTAAAGTTGTAAGTCTGAGTTTGTGTCCAAGAATGTTCCATCTTCTTAAAATCA  
ATACCCTTAACTCGATACGATTAACAAGGGTATCACCTTCAAACCTGACTTCAGCA  
CGCGTCTTGTAGGTCCCGTCATCTTTGAAAGATATAGTGCCTTCCGTGACATAACO  
TTCGGGCATGGCACTCTTGA AAAAGTCATGCCGTTTCATGTGATCCGGATAACGGG  
AAAAGCATTGAACACCATAGGTCAGAGTAGTGACAAGTGTGGCCACGGAACAGG  
TAGTTTTCCAGTAGTGCAAATAAATTAAGGGTGAGTTTTCCGTTTGTAGCATCACC  
TTCACCCTCTCCACGGACAGAAAATTTGTGCCATTAACATCACCATCTAATTCAAC  
AAGAATTGGGACAACCTCCAGTGAAAAGTTCTTCTCCTTTGCTACCGCTTCCACCTC  
CACCTGGATCCAAAGCTTCCGCCGCTCCTGAACCACCACCGCCACTACCTCCTCC  
CCCAGAACCTCCGCTCCACCAGCGTAATCTGGAACATCGTATGGGTAGCTGCTC  
ACGGTCACCAGGGTGCCCTGGCCCCAGTAGTCGAACAGGCCGGTCACGCAGTAG  
TACAGGGCGGTGTCGTGCTGCGCACCTTGCTCATCTGCAGGTACACGGTGTCT  
TGCCGTTGTCCTTGTGATGATGAAGCGGTCTTCCAGGGCGCTGTTGTAGTCGGT  
GATGCCGTCGCCCCAGATCACGCCGATCCACTCCAGGCCGCGGGCCGGGGCCTG  
GCGCACCCAGTTCACGCCGTAGTCGGTCAGGCTGAAGCCGCTCACGGCGCAGCT  
CAGCTTCCAGGCTGCCGCCGGGCTGCACCAGGCCGCCGCCGCTCTCCAGCAGCTT  
CACCTCGCTGCCGCCGCCGCTGCTGCCGCCGCCGCCGCTGCCGCCGCCGCCGC  
TGCCGCCGCCGCCGCCGCTTCACTCCACCTTGGTGCCCTGGCCGAACACCCAGT  
GGTTGCTGTACCACAGGGCGCAGAAGTAGGTGGCGAAGTCCTCGGGCTGCAGGC  
TGCTGATGGTCAGGGTGGCCTTGTGCGCCGATCAGGCTGCCGCTGAAGCGGCTGG  
GCACGCCGGGGGCGCGGTTGTTGGTGCCGCCGATCAGGCCCTTGAACAGCTTGC  
CGGGCTTCTCCTGCACCCAGCTGGCGTAGTTGCTGGTGGTCACGGCGCCGGTGC  
TGCTGCGGCAGGTGATGGTCACGCGGTGCCACGCTGGCGCTCAGGCTGCTGG  
GGCTCTGGGTCATCACGATGTCGGGGCCCATAAACCCTAGGTGTTAATCAGAAAA

ACTCAGATTAATCGACAAATTCGATCGCACAAACTAGAACTAACACCAGATCTAGA  
TAGAAATCACAAATCGAAGAGTAATTATTCGACAAACTCAAATTATTTGAACAAAT  
CGGATGATATCTATGAAACCCTAATCGAGAATTAAGATGATATCTAACGATCAAACC  
CAGAAAATCGTCTTCGATCTAAGATTAACAGAATCTAAACCAAAGAACATATACGAA  
ATTGGGATCGAACGAAAACAAAATCGAAGATTTTGAGAGAATAAGGAACACAGAAA  
TTTACCTTGATCACGGTAGAGAGAATTGAGAGAAAGTTTTTAAGATTTTGAGAAATT  
GAAATCTGAATTGTGAAGAAGAAGAGCTCTTTGGGTATTGTTTTATAGAAGAAGAA  
GAAGAAAAGACGAGGACGACTAGGTCACGAGAAAGCTAAGGCGGTGAAGCAATAG  
CTAATAATAAAATGACACGTGTATTGAGCGTTGTTTACACGCAAAGTTGTTTTGGC  
TAATTGCCTTATTTTTAGGTTGAGGAAAAGTATTTGTGCTTTGAGTTGATAAACACG  
ACTCGTGTGTGCCGGCTGCAACCACTTTGACGCCGTTTATTACTGACTCGTCGACA  
ACCACAATTTCTAACGGTCGTCATAAGATCCAGCCGTTGAGATTTAACGATCGTTA  
CGATTTATATTTTTTAGCATTATCGTTTTATTTTTAAATATACGGTGGAGCTGAAA  
ATTGGCAATAATTGAACCGTGGGTCCCCTGCATTGAAGCGTATTTTCGTATTTTCTA  
GAATTCTTCGTGCTTTATTTCTTTTCCTTTTTGTTTTTTTTGCCATTTATCTAATGCA  
AGTGGGCTTATAAAATCAGTGAATTTCTTGAAAAGTAACTTCTTTATCGTATAACA  
TATTGTGAAATTATCCATTTCTTTAATTTTTAGTGTTATTGGATATTTTTGTATGAT  
TATTGATTTGCATAGGATAATGACTTTTGTATCAAGTTGGTGAACAAGTCTCGTTAA  
AAAAGGCAAGTGGTTTGGTGAICTGATTTATCTTGTTATTTAATTCATATATCAATG  
GATCTTATTTGGGGCCTGGTCCATATTTAACACTCGTGTTCAAGTCCAATGACCAATA  
ATATTTTTTCATTAATAACAATGTAACAAGAATGATACACAAAACATTCTTTGAATAA  
GTTTCGCTATGAAGAAGGGAACCTTATCCGGTCTAGATCATCAGTTCATACAAACCT  
CCATAGAGTTCAACATCTTAACAAGAATATCCTGATCTGAAGAATGTGGAGGCTTT  
AGTCCCTTGATACTTGGGAGGCTGTGGAAGAACAGAAACGAGCTGGTGCTTAAA  
GGGAGGGAATTTGGAACCAATGAGGTATTAGTAAGGACACAAGAAGATGCAGATG  
AGTGGATTAGAAGGAAAGAGGCTCAGAATGTAAGGAAAGCACCAACCACAACACC  
GTCGGGACAGACGAGAAACATGGGAAGCTCCACCACAATCTTGGGTAAAGTGCAA  
CTTTGATGGGGCATGGCCAACAGAAGGATTAATGTGGCTTAGGGTGGGTGCTT  
CGCGATCATACAGGGAAGGTGTTATGGTTAGGTGCAAGAGCTGTGGTAAAAGTAA  
GAAGCGTGCTGGAAGTAGAAGTGGAGGCTCTTAGATGGGCTGTGCTGTCATTATC  
CCGATTCAATTATAGGAAGATCATTTTTGAGGTGGATTCTCAGCAACTTGTGTCTTT  
GGTTACATGAAAGTTATGCTTGTCAGTCTCAATCCAATTATCCAAGACATAAAGTA  
TCTACTTAGCAAGTTTGAAGATTTTATGCTTGTGCATACAAGCCGAGAAGGAAATG  
GAGTGGCAGATAGAATAGCTAAGGAATCTCTTTCTTTTGAGAATTATGATCTAAAGT  
TGTATTCTATTGTACCAATTTGGGTAAAAGCTCTGTTGAGCTAGACTCATATGCAT  
CCTAGGAAACAAGTTGTAATGAGTTGCTGGCCTCTCTTGGGATTGTTTCATCAAAGT  
AGCTGTCCCTACACACCACAACAGAATGGTGTGTGGAGAGAAAGCACAGACACA  
TCCTTGAGATGGCAAGGGCACTTAAGTTTCAGAGTGGTGTACCTACCAGGTTTTGG  
GGAGACTGTGTCAAGACTGTTGTATACCTGATCAATAGACTCCCTACTCCAATCTTA  
CAAGGCAAATGTCCATATGAACTACTCTATCAGAAACATGCCAAGCTTGATCACTT  
GAGAGTGTTTGGGTGTCTTGCTTTTGCAGCAACACTGCCCAAAGGTGACAAACTTG  
CACCTAGAGCCAAGCGAACCATCTTCATTGGTTATTCTGAGACTCAAAGGGTTAC  
AGGTTGTATGACTTGGATAATAAGGTGATCATAGTGAGCAGGGATGTAGTTTTCAG  
AGAGTTTCAGTTCCCTTTCAAAGAGTCCATCTCCCATGAACCTGATATGTTCACTCG  
AGCAGGTTCACTTAGCTCTGAAGATACAGCTTTGCAGCTAGTGTATAATGATATTTT  
TCCTTCCAGCTTTCATACTGATGATGATACTCCAGTTCTTATTCTGACATTGT

AGAGGCCAATGAGGATATCACTTTGGGGACTCATTCTACCCAAAATCATATCACTT  
CAGCTGATGCTGCACCTTCAGGCCACCTGCATGCTCCTGCAGAGTCAGTTGAGTC  
AGCTGAGCCTGACCTAGCAAATGCTGAATTTGAGCACCATACTGCTGTAGCTGATC  
CCTCTCTAGTTCCAGCAAACCTGCACACTAGACCTAAACGCAATGCAGGTCCTCCC  
ATCTGGCTCAAGGACTTTGTGACACTGAACAAAGGCTCTAGGGATGTTCCATACCC  
TATAGCCAATGATGTTTCTATGATCACTTGCCTGTTCACTATCAAGCTTATTTGAGT  
GCTTTCTCCACTTATACTGAACCTAAATCCTTCAAAGAAGCAGCTCAAGATGAGAAA  
TGGATGGAGGCCATGTCCCTTGAGATACAGGCTCTTGAGGATAATAACACCTGGG  
AGATTGTCCTTTACCCCCTGGTAAACAGCCTATAGGGTCCAAATGGGTGTACAAA  
ATTAATACAAAGCTAATGGTGAAGTTGACAGGTTTAAGGCAAGGCTAGTGGCCAA  
GGGATACACTCAGCAAGAAGGCTTGACTACCATGAACTTTTTCTCCAGTGGCCA  
AAATGGTCACTGTAAAAGCTGTCATATCTGTTGCTGCTTCCAAGGGCTGGTTCCTTT  
TCCAGATGGATGTCAACAATGCTTTTCTACAAGGTGACCTCATGGAAGAAGTTTATA  
TGTCTCTGCCTCAGGGTTTTACAGCCAAGGGGAGACCAAAGTGTGCAGGCTGTT  
GAATCCCTCTATGGTTTAAAGCAAGCATCAAGGCAGTGGAACATCAAGCTTACCAC  
TGCCTTATGCAGGCTGTTTTATGCAAAGTGCTTATGATCACTCCTGTTTACCAA  
AAGAGAGGGGACTGACCTTGCATAATCCTGATTTATGTGGATGATCTGTTAATAA  
CAGGCAGCAGCAATGTTTTGATTTCAGAAGCAAAGGCAACCCTGCATCAGCATTTC  
AAGATGAAAGATTTGGGAGAATAAAATACTTCTTAGGCATTGAGGTGCTGAGATC  
AGAAAAGGGAATCCTACTGAACCAGAGGAAGTATGCACTGGAACATGATATCAGGT  
GTTGGTCTGGGAGGCTGCAGACCAGTGTCAACCCCAATGGAACAGAACCAAAGGC  
TGACTACTGTAGAATATGACAAGCACTTAGGAAAGACTGATGATGCAGAGTTAGAG  
GATGTGGGTTCTATCAGAGACTGGTGGGAAAGCTTCTCTACTTGACAATCACAAG  
GCCAGATATCAGCTTTGCAGTGCAGGTGCTGAGTCAATTCATGCAGCAACCCAAAC  
AGTCACACCTGGAAGCAGCATTGAGGGTTGTGAAGTACATAAAAAGGTTCTCCAGGT  
GTTAGGAA**GCGGCCGCATGCATATG**AGTCTAGCTCAACAGAGCTTTTAACCCAAAT  
TGGTACAATAGAATACAACCTTTAGATCATAATTCTCAAAGAAAGAGATTCCCTTAGC  
TATTCTATCTGCCACTCCATTTCTTCTCGGCTTGATGCACAAGCATAAAAATCCTC  
AACTTGCTAAGTAGATACTTTATGTCTTGGATAATTGGATTGAGACTTGACAAGCA  
TAACTTTTCATGTAACCAAAGACACAAGTTGCTGAGAATCCACCTCAAAAATGATCTT  
CCTATAATTGAATCGGGATAATGACAGCACAGCCCATCTAAGAGCCTCCACTTCTA  
CTTCCAGCACGCTTCTTACTTTTACCACAGCTCTTGCACCTAACCATAACACCTTCC  
CTGTATGATCGCGAAGCACCCACCCTAAGCCACATTTTAATCCTTCTGTTGGCCAT  
GCCCCATCAAAGTTGCACTTAACCCAAGATTGTGGTGGAGCTTCCCATGTTTCTCG  
TCTGTCCCGACGGTGTGTTGGTGGTGGTCTTTCCTTACATTCTGAGCCTCTTTCCTTC  
TAATCCACTCATCTGCATCTTCTTGTGTCCTTACTAATACCTCATTGGTTCCAAATTC  
CCTCCCTTTAAGCACCAGCTCGTTTCTGTTCTTCCACAGCCTCCAAGTATCCAAG  
GGACTAAAGCCTCCACATTCTTCCAGATCAGGATATTCTTGTTAAAGATGTTGAACTC  
TATGGAGGTTTGATGAACTGATGATCTAGGACCGGATAAGTTCCCTTCTTCATAG  
CGAACTTATTCAAAGAATGTTTTGTGTATCATTCTTGTTACATTGTTATTAATGAAAA  
AATATTATTGGTCATTGGACTGAACACGAGTGTTAAATATGGACCAGGCCCCAAAT  
AAGATCCATTGATATATGAATTAATAACAAGAATAAATCGAGTCACCAAACCACTT  
GCCTTTTTTAACGAGACTTGTTACCAACTTGATACAAAAGTCATTATCCTATGCAA  
ATCAATAATCATACAAAAATATCCAATAACACTAAAAAATTAAGAAATGGATAATT  
TCACAATATGTTATACGATAAAGAAGTTACTTTTCCAAGAAATCACTGATTTTATAA  
GCCCACTTGCATTAGATAAATGGCAAAAAAAAAACAAAAAGGAAAAGAAATAAAGCA

CGAAGAATTCTAGAAAATACGAAATACGCTTCAATGCAGTGGGACCCACGGTTCAA  
TTATTGCCAATTTTCAGCTCCACCGTATATTTAAAAATAAAACGATAATGCTAAAAA  
AATATAAATCGTAACGATCGTTAAATCTCAACGGCTGGATCTTATGACGACCGTTAG  
AAATTGTGGTTGTCGACGAGTCAGTAATAAACGGCGTCAAAGTGGTTGCAGCCGG  
CACACACGAGTCGTGTTTATCAACTCAAAGCACAAATACTTTTCCTCAACCTAAAAA  
TAAGGCAATTAGCCAAAAACAACCTTTGCGTGTAACAACGCTCAATACACGTGTCA  
TTTTATTATTAGCTATTGCTTACCAGCCTTAGCTTTCTCGTGACCTAGTCGTCTCTCG  
TCTTTTCTTCTTCTTCTTCTATAAAACAATACCCAAAGAGCTCTTCTTCTTACAATT  
CAGATTTCAATTTCTCAAATCTTAAAAACTTTCTCTCAATTCTCTTACCGTGATCA  
AGGTAAATTTCTGTGTTCTTATTCTCTCAAATCTTCGATTTTGTTTTCGTTTCGATC  
CCAATTTTCGTATATGTTCTTTGGTTTAGATTCTGTAAATCTTAGATCGAAGACGATTT  
TCTGGGTTTGATCGTTAGATATCATCTTAATTCTCGATTAGGGTTTCATAGATATCAT  
CCGATTTGTTCAAATAATTTGAGTTTTGTGCAATAATTACTCTTCGATTTGTGATTTCT  
TATCTAGATCTGGTGTTAGTTTCTAGTTTGTGCGATCGAATTTGTGATTAATCTGA  
GTTTTTCTGATTAACAGGGATCATCAACAAGTTTGTACAAAAAAGCAGGCTCTTTAA  
AGTATTTTTACAACAATTACCAACAACAACAACAACAACAACATTACAATTACTAT  
TTACAATTACAAAAAAAGTTAACATGGACAAGAAGTACAGCATCGGCCTGGCCATC  
GGCACCAACTCTGTGGGCTGGGCCGTGATACCGACGAGTACAAGGTGCCCAGC  
AAGAAATTC AAGGTGCTGGGCAACACCGACCGGCACAGCATCAAGAAGAACCTGA  
TCGGCGCCCTGCTGTTTCGACAGCGGAGAAACAGCCGAGGCCACCCGGCTGAAGA  
GAACCGCCAGAAGAAGATACACCAGACGGAAGAACCGGATCTGCTATCTGCAAGA  
GATCTTCAGCAACGAGATGGCCAAGGTGGACGACAGCTTCTTCCACAGACTGGAA  
GAGTCCTTCTGGTGAAGAGGATAAGAAGCACGAGCGGCACCCCATCTTCGGCA  
ACATCGTGGACGAGGTGGCCTACCACGAGAAGTACCCACCATCTACCACCTGAG  
AAAGAACTGGTGGACAGCACCGACAAGGCCGACCTGCGGCTGATCTATCTGGCC  
CTGGCCACATGATCAAGTTCGGGGCCACTTCTGATCGAGGGCGACCTGAACC  
CCGACAACAGCGACGTGGACAAGCTGTTTCATCCAGCTGGTGCAGACCTACAACCA  
GCTGTTTCGAGGAAAACCCCATCAACGCCAGCGCGTGGACGCCAAGGCCATCCT  
GTCTGCCAGACTGAGCAAGAGCAGACGGCTGGAAAATCTGATCGCCAGCTGCC  
GGCGAGAAGAAGAATGGCCTGTTTCGGCAACCTGATTGCCCTGAGCCTGGGCCTG  
ACCCCAACTTCAAGAGCAACTTCGACCTGGCCGAGGATGCCAACTGCAGCTGA  
GCAAGGACACCTACGACGACGACCTGGACAACCTGCTGGCCAGATCGGCGACC  
AGTACGCCGACCTGTTTCTGGCCGCAAGAACCTGTCCGACGCCATCCTGCTGAG  
CGACATCCTGAGAGTGAACACCGAGATCACCAAGGCCCCCTGAGCGCCTCTATG  
ATCAAGAGATACGACGAGCACCACCAGGACCTGACCCTGCTGAAAGCTCTCGTGC  
GGCAGCAGCTGCCTGAGAAGTACAAGAGATTTTCTTCGACCAGAGCAAGAACGG  
CTACGCCGGCTACATCGATGGCGGAGCCAGCCAGGAAGAGTTCTACAAGTTCATC  
AAGCCATCCTGGAAAAGATGGACGGCACCGAGGAAGTCTCGTGAAGCTGAACA  
GAGAGGACCTGCTGCGGAAGCAGCGGACCTTCGACAACGGCAGCATCCCCACC  
AGATCCACCTGGGAGAGCTGCACGCCATTCTGCGGCGGCAGGAAGATTTTTACCC  
ATTCTGAAGGACAACCGGGAAAAGATCGAGAAGATCCTGACCTTCCGCATCCCC  
TACTACGTGGGCCCTCTGGCCAGGGGAAACAGCAGATTCGCCTGGATGACCAGAA  
AGAGCGAGGAAACCATCACCCCTGGAACCTTCGAGGAAGTGGTGGACAAGGGCG  
CCAGCGCCAGAGCTTCATCGAGCGGATGACCAACTTCGATAAGAACCTGCCAA  
CGAGAAGGTGCTGCCAAGCACAGCCTGCTGTACGAGTACTTACCCTGTACAAC  
GAGCTGACCAAAGTGAATACGTGACCGAGGGAATGAGAAGCCCGCCTTCTGA

GCGGCGAGCAGAAAAAGCCATCGTGGACCTGCTGTTCAAGACCAACCGGAAAGT  
GACCGTGAAGCAGCTGAAAGAGGACTACTTCAAGAAAATCGAGTGCTTCGACTCC  
GTGGAAATCTCCGGCGTGAAGATCGGTTCAACGCCTCCCTGGGCACATACCAG  
ATCTGCTGAAAATTATCAAGGACAAGGACTTCCTGGACAATGAGGAAAACGAGGAC  
ATTCTGGAAGATATCGTGCTGACCCTGACACTGTTTGAGGACAGAGAGATGATCGA  
GGAACGGCTGAAAACCTATGCCACCTGTTGACGACAAAAGTGATGAAGCAGCTG  
AAGCGGCGGAGATACACCGGCTGGGGCAGGCTGAGCCGGAAGCTGATCAACGGC  
ATCCGGGACAAGCAGTCCGGCAAGACAATCCTGGATTCCTGAAGTCCGACGGCT  
TCGCCAACAGAACTTCATGCAGCTGATCCACGACGACAGCCTGACCTTTAAGAG  
GACATCCAGAAAGCCCAGGTGTCCGGCCAGGGCGATAGCCTGCACGAGCACATT  
GCCAATCTGGCCGGCAGCCCCGCCATTAAGAAGGGCATCCTGCAGACAGTGAAG  
GTGGTGGACGAGCTCGTGAAGTGATGGGCCGGCACAAGCCCGAGAACATCGTG  
ATCGAAATGGCCAGAGAGAACCAGACCACCCAGAAGGGACAGAAGAACAGCCGC  
GAGAGAATGAAGCGGATCGAAGAGGGCATCAAGAGCTGGGCAGCCAGATCCTG  
AAAGAACACCCCGTGGAAAACACCCAGCTGCAGAACGAGAAGCTGTACCTGTACT  
ACCTGCAGAATGGGCGGGATATGTACGTGGACCAGGAACTGGACATCAACCGGCT  
GTCCGACTACGATGTGGACGCTATCGTGCCTCAGAGCTTTCTGAAGGACGACTCC  
ATCGATAACAAAGTGCTGACTCGGAGCGACAAGAACCAGGGGCAAGAGCGACAAC  
GTGCCCTCCGAAGAGGTCGTGAAGAAGATGAAGAACTACTGGCGCCAGCTGCTGA  
ATGCCAAGCTGATTACCCAGAGGAAGTTCGACAATCTGACCAAGGCCGAGAGAGG  
CGGCCTGAGCGAACTGGATAAGGCCGGCTTCATCAAGAGACAGCTGGTGGAAAC  
CCGGCAGATCACAAAGCACGTGGCACAGATCCTGGACTCCCGGATGAACACTAAG  
TACGACGAGAACGACAAACTGATCCGGGAAGTGAAAGTGATCACCTGAAGTCCA  
AGCTGGTGTCCGATTTCCGGAAGGATTTCCAGTTTTACAAAGTGCGCGAGATCAAC  
AACTACCACCACGCCACGACGCCTACCTGAACGCCGTCGTGGGAACCGCCCTG  
ATCAAAAAGTACCCTAAGCTGGAAAGCGAGTTCGTGTACGGCGACTACAAGGTGT  
ACGACGTGCGGAAGATGATCGCCAAGAGCGAGCAGGAAATCGGCAAGGCTACCG  
CCAAGTACTTCTTCTACAGCAACATCATGAACTTTTTCAAGACCGAGATTACCCTGG  
CCAACGGCGAGATCCGGAAGCGGCCTCTGATCGAGACAAACGGCGAAACAGGCG  
AGATCGTGTGGGATAAGGGCCGGGACTTTGCCACCGTGCGGAAAGTGCTGTCTAT  
GCCCAAGTGAATATCGTGAAAAAGACCGAGGTGCAGACAGGCGGCTTCAGCAA  
GAGTCTATCCTGCCAAGAGGAACAGCGACAAGCTGATCGCCAGAAAGAAGGACT  
GGGACCCTAAGAAGTACGGCGGCTTCGACAGCCCCACCGTGGCCTATTCTGTGCT  
GGTGGTGGCCAAAGTGGAAGGGCAAGTCCAAGAACTGAAGAGTGTGAAAGAG  
CTGCTGGGGATCACCATCATGGAAAGAAGCAGCTTCGAGAAGAATCCCATCGACT  
TTCTGGAAGCCAAGGGCTACAAAGAAGTGAAAAGGACCTGATCATCAAGCTGCC  
TAAGTACTCCCTGTTGAGCTGGAAAACGGCCGGAAGAGAATGCTGGCCTCTGCC  
GGCGAACTGCAGAAGGGAAACGAACTGGCCCTGCCCTCCAAATATGTGAACTTCC  
TGTACCTGGCCAGCCACTATGAGAAGCTGAAGGGCTCCCCGAGGATAATGAGCA  
GAAACAGCTGTTTGTGGAACAGCACAAACACTACCTGGACGAGATCATCGAGCAG  
ATCAGCGAGTTCTCCAAGAGAGTGATCCTGGCCGACGCTAATCTGGACAAGGTGC  
TGAGCGCCTACAACAAGCACAGAGACAAGCCTATCAGAGAGCAGGCCGAGAATAT  
CATCCACCTGTTTACCCTGACCAATCTGGGAGCCCCTGCCGCCTTCAAGTACTTTG  
ACACCACCATCGACCGGAAGAGGTACACCAGCACCAAGAGGTGCTGGACGCCA  
CCCTGATCCACCAGAGCATCACCGGCCTGTACGAGACACGGATCGACCTGTCTCA  
GCTGGGAGGCGACGCCATCCCTATGACGTGCCCGATTATGCCAGCCTGGGCAG

CGGCTCCCCCAAGAAAAACGCAAGGTGGAAGATCCTAAGAAAAAGCGGAAAGTG  
GAAGATGCTCCAAGAAGAAGAGAAAGGTCGACGGCATTGGTAGTGGGAGCAACG  
GCAGCAGCGGATCCAACGGTCCGACTGACGCCGCGGAAGAAGAACTTTTGAGCA  
AGAATTATCATCTTGAGAACGAAGTGGCTCGTCTTAAGAAAGTTCTGGCAGTGGA  
GGTTCTGGCTCCGGATCTGGTGGTTCGGGCTCAGGCGGGTCCGGATCAGGCGAA  
GAACTGCTTCAAAGAATTACCACCTGGAAAATGAGGTAGCTAGACTGAAAAAGG  
GAGCGGAAGTGGGGGCTCCGGGTCGGGCTCAGGGGGCTCCGGTTCGGGAGGCT  
CAGGGTCGGGGGAGGAGTTGCTGAGCAAAAATTATCATTGGAGAACGAAGTAGC  
ACGACTAAAGAAAGGGTCCGGATCGGGTGGTTCAGGATCTGGATCCGGAGGATCA  
GGTCCGGTGGTTCGGGCTCAGGAGAGGAGTTACTCTCGAAAATTATCATCTCG  
AAACGAAGTGGCTCGGCTAAAAAGGGCAGTGGTTCTGGAGGATCTGGGTCGG  
GGTCAGGCGGGTCTGGATCTGGGGGATCTGGATCTGGTGAAGAGCTATTATCTAA  
AACTACCACCTCGAAAATGAGGTGGCACGCTTAAAAAGGGAAGTGGCAGTGGT  
GGGTCGGGATCTGGCTCTGGTGGCTCAGGCTCGGGAGGTTCCGGTTCGGGGAA  
GAGCTACTATCCAAGAATTATCATCTTGAGAACGAGGTAGCGCGTTTGAAGAAGG  
TTCCGGCTCAGGAGGATCTGGGTCAGGGTCAGGGGGTTCGGGTCAGGCGGGTC  
CGGGTCAGGCGAGGAAGTCTCTCGAAGAACTATCATCTTGAAAATGAGGTCGCT  
CGATTA AAAAGGGATCGGGCAGTGGTGGGTCGGGCTCCGGTTCGGGAGGATCG  
GGATCTGGGGGCTCGGGATCCGGGGAGGAAGTCTTCAAAGAATTACCACCTCG  
AAACGAAGTAGCTCGATTAAGAAGGTTCCAGGGTCGGGTCAGGTTCCGG  
ATCAGGTGGGTCAGGCTCCGGTGGTTCAGGTTCCGGGAGAAGAATTACTGAGTAA  
AATTATCATCTGAAAATGAGGTAGCGAGACTAAAAAGGGGAGTGGTTCTGGCG  
GTTCCGGATCTGGCTCTGGGGGCTCTGGGTCGGGAGGGTCTGGGTCGGGAGG  
AATTGCTATCGAAAATTATCATCTTGAGAACGAAGTTGCTAGGCTCAAAAAGGG  
TCAGGCTCAGGCGGGTCCGGGTCAGGGTCGGGAGGTTCCGGATCCGGGGGATC  
AGGCTCAGGGTAA<sup>CCC</sup>GGGGGCGCGCCATGATAAC<sup>TAG</sup>AGTCCTGCTTTAATGAG  
ATATGCGAGACGCCTATGATCGCATGATATTTGCTTTCAATTCTGTTGTGCACGTTG  
TAAAAACCTGAGCATGTGTAGCTCAGATCCTTACCGCCGTTTCGGTTCATTCTA  
ATGAATATATCACCCGTTACTATCGTATTTTATGAATAATATTCTCCGTTCAATTTA  
CTGATTGTACCCTACTACTTATATGTACAATATTTAAATGAAAACAATATATTGTGCT  
GAATAGGTTTATAGCGACATCTATGATAGAGCGCCACAATAACAAACAATTGCGTTT  
TATTATTACAAATCCAATTTAAAAAAGCGGCAGAACCAGTCAAACCTAAAAGACT  
GATTACATAAATCTTATTCAAATTTCAAAGTGCCCCAGGGGCTAGTATCTACGACA  
CACCGAGCGGCGAATAAACGCTCACTGAAGGGAAGTCCGGTTCGCCGCGG  
CGCGCATGGGTGAGATTCTTGAAGTTGAGTATTGGCCGTCCGCTCTACCGAAAG  
TTACGGGCACCATTCAACCCGTCCAGCACGGCCGGGTAACCGACTTGCTG  
CCCCGAGAATTATGCAGCATTTTTTTGGTGTATGTGGGCCCAAATGAAGTGCAGG  
TCAAACCTTGACAGTGACGACAAATCGTTGGGCGGGTCCAGGGCGAATTTGCGA  
CAACATGTGAGGCTCAGCAGGACCGGCATGCAAGCTAGCTTACTAGTGATATTCT  
ATAGTGTACCTAAATCTGCGGC

**SunTagng-14aa**

**NOS term**

**TET1cd**

2xNLS  
Linker  
1xHA  
sfGFP  
scFV  
UBQ10  
Insulator  
Omega RBC  
dCAS9  
3xNLS  
GCN4 10x 14aa  
OCS term

CACGGGGTGGTTTGGTTTAAACGTAACATAGATGACACCGCGCGGATAATTTATC  
CTAGTTTGCGCGCTATATTTGTTTTCTATCGCGTATTAATGTATAATTGCGGGAC  
TCTAATCATAAAAACCCATCTCATAAATAACGTCATGCATTACATGTTAATTATTACA  
TGCTTAACGTAATTC AACAGAAATTATATGATAATCATCGCAAGACCGGCAACAGG  
ATTCAATCTTAAGAACTTTATTGCCAAATGTTTGAACGATCGGGGAAATTTCGAGCT  
CAAACCTTACGGCCATGGCGTAGGCGGCCTTTTCCGTTGTGATCTTCGCGGTCTCCT  
CCTTGTTTTTGGACTAGTACCACCACCGCTACCACCACCTTCGGTTACCGTGAAGG  
TTTTGGTAGCGTCGTCGTAGGTCCATTCACCGTCAACACCGTTGTCGTTAGCGTAC  
TGTTTGAAAACTTTTTCCGCGGTAGCAGCGTCAACAGCTTCGGTGGTGGTTTCACC  
TTTCAGGGTTTTACCGTTCAGGATAAGCTTGTACTCTTCGGTCCGAGATCCTCCTC  
CCGTACGTCAGACCCAATGGTTATAGGGCCCCGCAACGTGTGTGAGAGCATAAGG  
GGACACGGTGACAACATTGTCATGGGTTAATGTTAATGCTTTATGAGAAGGAATTT  
GGTTCAATTCATTTACTTCAGAGGACTGTTCTGGACCTTCATTAGCTGCCTGGTCTT  
TTTGCTCTGAGGCCTTCATTTTCTTATTCTTAGCTTCTTTAGCCTCAAACCTTAATCTT  
GTTTAGTTCAAACCATGTTGGGGCTTATTTAGGTTTTTGTGCTGGTAAAAGACAAG  
GGAGAGGCGGGTGGATGATTACGGTTGGGGTGCTCAACAGGAGTGGTAGCGTG  
CAGCTCTCGCCGGGCACACTCAATCAAACCGAGCCGTGAGCAGGTGCGATGGC  
CACCCACCAATATTTGCATCCAAAAGATGTGCTCACTGTCTGACCAATACTCATC  
AATGTGGGGCAATTTCTCCTCAGCAGGTGACAGGGGGTCATCAGATAGGGGTTTCG  
TCTGATGGAGGCTCATCTGCTTCAGAATGCTGCTCATCTTCTTCCATTGGAGAAGA  
GGCAAGGTCTTGAGGAGAGGTGAGGAAGGAGGGCTGGTGGTTTGGCTGATGAGG  
CGTTAGCGGCTCAGTCACACCAGTGAAGGCTCAGAATTAATGAGGGGCTCCATC  
ACAGGAGCAGACAGGGTGGGGAGAGGAGCCACTTCGCCAAGCTGTGAAATGCCA  
GGGCCATCAGCAGCTGCAGCATTGGCACCCTGAGTCTTCCCGAAGGCATCGTAC  
AGTGGGGAGTGCTGCTTCTTTCTGAAAACCCGCATGAGGCTGTTGCGTCATTCTTC  
AGTGGAGCTGGTGTGGCTGAAGCAGTCTTCGGGGACCAGGAGAAGCCTGGAGAT  
GCCTCTTTCCTGGGTGAGGAGCGGATGGCATCAGCGAATAAGTTTTAGTGTTGTC  
TGAACTTTTTAAGATAAAATGGGGTTCGGTTTCACTTTTTACTTCAGGTTGCACGGT  
CTCAGTGTTACTCCCTAAGGTTGGCAGTGACGAAGGCTTACTGTTGTTTGGTGGT  
TTGAGTTATTCTTCCGCTTGATTGGGGGAATAGGTTTCTTTTCCACTGCCCTTATCT  
TATGTGCAAGAACCTCTGTCATCATCGCAGCCCTCTTCTTCCAGAACGGGGAACA

GGCTGAGTGAAACACGTTCTTTTTTTGCGGCGGGGTGCCAGGACCTCGATGGCCC  
CAGATTTGATCTTGGCTTCCATTCCCTTGGAGCCAACTCATCTGTGTCTGAAA  
GCTTATAAAGAGGTAGCACATGGAGCTGCTCATCTTGGAGGAATAACACCCAAAGAG  
CGGTTATCTTCTCGAGTTAAGGTACAAACCACAGTGCTTCCATTATTCATGTTGTGA  
ATGTCCCTGTGGGGATGAGCACAGAAGTCCAGGCAAGCAGTGACCCAGAGAAG  
GGTCGACCTTCCCTGCTGCCAAGCCGACATTCTCGGGCAACATTTTCATATCCAC  
CTGATTTTGGTAAGCTACTGGAGCATACTGCTTATAAATTGGAGCTAATCGTGTAGC  
CAAACCTCTGTAAGTTATCTTCAAGGTTTTTTTCATGTAAGGGAGAGCTTGGATCAAT  
TCTAAATCTTCTGGGGCTTGGGCTTCTACCAAACCTTACAGCCATTAAGTACATACT  
CCATGAACAGCCAAAAGAGAATGAAGCTCCACAAGTCTCTGGATCAATTCCTTGAC  
ATGTACAGGTACGATTTTCATTGAGGGTGCATCTTCTGTCCGGTAGGGTGCCATTG  
TATGACTTTAGATTCTCTGTGAGCTCTGTGTATAGCCGGTCGGCCATTGGAAGAGG  
GATGCCATCCCACACCATGATGAGCACCACCATCACAGCAGTTGGACAGTGGTGG  
CCTGTACGCTGCCGGACCAAACAAAGAACTTTTTCTTCATCACTGCTTCTTCTTAAA  
ACCACTTAGCAATTGGACACCCATGAGAGCTTTTCCCTTCTTACCAGGTGTACAC  
TACTATTTCTATCCTTATTGCGTTTCTTTTTGACCATACCTATTCTCCATGATTTCC  
CTGACAGCAGCAACACTTGGTCCTGCCCAAGGTGTGTATAATATGGGCCTTTGTCT  
TTTTTGATAACTCGATCAAGACAGCTGCAGGTGGGCAGCCCGGATCCGCCACCG  
CCCACTTTCCGCTTTTTCTTAGGAGCTTCCACCTTGCCTTTTTCTTGGGAGCGCC  
GCTGCCCAGGCTGGCATAATCGGGCACGTCATAGGGATACGTACGACCGGTCCG  
ACCTCCACC TTTGTAGAGCTCATCCATGCCATGTGTAATCCAGCAGCAGTTACAA  
ACTCAAGAAGGACCATGTGGTCACGCTTTTCGTTGGGATCTTTCGAAAGGACAGAT  
TGTGTCGACAGGTAATGGTTGTCTGGTAAAAGGACAGGGCCATCGCCAATTGGAG  
TATTTTGTTGATAATGGTCTGCTAGTTGAACGGAACCATCTTCAACGTTGTGGCGAA  
TTTTGAAGTTAGCTTTGATTCCATTCTTTGTTTGTCTGCCGTGATGTATACATTGT  
TGAGTTAAAGTTGTAAGTTCGAGTTTGTGTCCAAGAATGTTCCATCTTCTTAAAATCA  
ATACCCTTAACTCGATACGATTAACAAGGGTATCACCTTCAAACCTTGAATTCAGCA  
CGCGTCTTGTAGGTCCCGTCATCTTGAAGATATAGTGCGTTCCTGTACATAACC  
TTCGGGCATGGCACTCTTGA AAAAGTCATGCCGTTTCATGTGATCCGGATAACGGG  
AAAAGCATTGAACACCATAGGTCAGAGTAGTGACAAGTGTTGGCCACGGAACAGG  
TAGTTTTCCAGTAGTGCAAATAAATTAAGGGTGAAGTTTCCGTTTGTAGCATCACC  
TTCACCCTCTCCACGGACAGAAAATTTGTGCCCATTAACATCACCATCTAATTC AAC  
AGAATTGGGACAACCTCCAGTGAAAAGTTCTTCTCCTTTGCTACCGCTTCCACCTC  
CACCTGGATCCAA GCTTCCGCCGCCTCCTGAACCACCACCGCCACTACCTCCTCC  
CCCAGAACCTCCGCCTCCACCAGCGTAATCTGGAACATCGTATGGGTAGCTGCTC  
ACGGTCACCAGGGTGCCCTGGCCCCAGTAGTCGAACAGGCCGGTCACGCAGTAG  
TACAGGGCGGTGTCGTGCTGCGCACCTTGCTCATCTGCAGGTACACGGTGTCT  
TGCCGTTGTCCTTGTGATGATGAAGCGGTCCCTCAGGGCGCTGTTGTAGTCGGT  
GATGCCGTCGCCCCAGATCACGCCGATCCACTCCAGGCCGCGGGCCGGGGCCCTG  
GCGCACCCAGTTCACGCCGTAGTCGGTCAGGCTGAAGCCGCTCACGGCGCAGCT  
CAGCTTCAGGCTGCCGCCGGGCTGCACCAGGCCGCCGCCGCTCTCCAGCAGCTT  
CACCTCGCTGCCGCCGCCGCTGCTGCCGCCGCCGCCGCTGCCGCCGCCGCCGC  
TGCCGCCGCCGCCGCCGCTTCACTCCACCTTGGTGCCCTGGCCGAACACCCAGT  
GGTTGCTGTACCACAGGGCGCAGAAGTAGGTGGCGAAGTCCCTCGGGCTGCAGGC  
TGCTGATGGTCAGGGTGGCCTTGTCCGGATCAGGCTGCCGCTGAAGCGGCTGG  
GCACGCCGGGGGCGCGGTTGTTGGTGCCGCCGATCAGGCCCTTGAACAGCTTGC



CGGGCTTCTCCTGCACCCAGCTGGCGTAGTTGCTGGTGGTCACGGCGCCGGTGC  
TGCTGCGGCAGGTGATGGTCACGCGGTGCGCCACGCTGGCGCTCAGGCTGCTGG  
GGCTCTGGGTCATCACGATGTCGGGGCCCATAAACCCTAGGTGTTAATCAGAAAA  
ACTCAGATTAATCGACAAATTCGATCGCACAAACTAGAACTAACACCAGATCTAGA  
TAGAAATCACAAATCGAAGAGTAATTATTCGACAAAACCTCAAATATTTGAACAAAT  
CGGATGATATCTATGAAACCCTAATCGAGAATTAAGATGATATCTAACGATCAAACC  
CAGAAAATCGTCTTCGATCTAAGATTAACAGAATCTAAACCAAAGAACATATACGAA  
ATTGGGATCGAACGAAAACAAAATCGAAGATTTTGAGAGAATAAGGAACACAGAAA  
TTTACCTTGATCACGGTAGAGAGAATTGAGAGAAAGTTTTTAAGATTTTGAGAAATT  
GAAATCTGAATTGTGAAGAAGAAGAGCTCTTTGGGTATTGTTTTATAGAAGAAGAA  
GAAGAAAAGACGAGGACGACTAGGTCACGAGAAAGCTAAGGCGGTGAAGCAATAG  
CTAATAATAAAATGACACGTGTATTGAGCGTTGTTTACACGCAAAGTTGTTTTGGC  
TAATTGCCTTATTTTTAGGTTGAGGAAAAGTATTTGTGCTTTGAGTTGATAAACACG  
ACTCGTGTGTGCCGGCTGCAACCACTTTGACGCCGTTTATTACTGACTCGTCGACA  
ACCACAATTTCTAACGGTCGTCATAAGATCCAGCCGTTGAGATTTAACGATCGTTA  
CGATTTATATTTTTTAGCATTATCGTTTTATTTTTAAATATACGGTGGAGCTGAAA  
ATTGGCAATAATTGAACCGTGGGTCCCCTGCATTGAAGCGTATTTTCGATTTTTCTA  
GAATTCTTCGTGCTTTATTTCTTTTCTTTTGTTTTTTTGCCATTTATCTAATGCA  
AGTGGGCTTATAAAATCAGTGAATTTCTTGAAAAGTAACTTCTTTATCGTATAACA  
TATTGTGAAATTATCCATTTCTTTAATTTTTTAGTGTTATTGGATATTTTTGTATGAT  
TATTGATTTGCATAGGATAATGACTTTTGTATCAAGTTGGTGAACAAGTCTCGTTAA  
AAAAGGCAAGTGGTTTGGTGACTCGATTTATCTTGTATTTAATTCATATATCAATG  
GATCTTATTTGGGGCCTGGTCCATATTTAACACTCGTGTTCAAGTCCAATGACCAATA  
ATATTTTTTCATTAATAACAATGTAACAAGAATGATACACAAAACATTCTTTGAATAA  
GTTTCGCTATGAAGAAGGGAACCTATCCGGTCTAGATCATCAGTTCATACAAACCT  
CCATAGAGTTCAACATCTTAACAAGAATATCCTGATCTGAAGAATGTGGAGGCTTT  
AGTCCCTTGGATACTTGGGAGGCTGTGGAAGAACAGAAACGAGCTGGTGCTTAAA  
GGGAGGGAATTTGGAACCAATGAGGTATTAGTAAGGACACAAGAAGATGCAGATG  
AGTGGATTAGAAGGAAAGAGGCTCAGAATGTAAGGAAAGCACCAACCACAACACC  
GTCGGGACAGACGAGAAACATGGGAAGCTCCACCACAATCTTGGGTAAAGTGCAA  
CTTTGATGGGGCATGGCCAACAGAAGGATTAATGTGGCTTAGGGTGGGTGCTT  
CGCGATCATACAGGGAAGGTGTTATGGTTAGGTGCAAGAGCTGTGGTAAAAGTAA  
GAAGCGTGCTGGAAGTAGAAGTGGAGGCTCTTAGATGGGCTGTGCTGTCATTATC  
CCGATTCAATTATAGGAAGATCATTTTTGAGGTGGATTCTCAGCAACTTGTGTCTT  
GGTTACATGAAAGTTATGCTTGTCAAGTCTCAATCCAATTATCCAAGACATAAAGTA  
TCTACTTAGCAAGTTTGAAGATTTTATGCTTGTGCATACAAGCCGAGAAGGAAATG  
GAGTGGCAGATAGAATAGCTAAGGAATCTCTTTCTTTGAGAATTATGATCTAAAGT  
TGTATTCTATTGTACCAATTTGGGTAAAAGCTCTGTTGAGCTAGACTCATATGCAT  
CCTAGGAAACAAGTTGTAATGAGTTGCTGGCCTCTCTTGGGATTGTTTCATCAAAGT  
AGCTGTCCCTACACACCACAACAGAATGGTGTGTTGTGGAGAGAAAGCACAGACACA  
TCCTTGAGATGGCAAGGGCACTTAAGTTTCAGAGTGGTGTACCTACCAGGTTTTGG  
GGAGACTGTGTCAAGACTGTTGTATACCTGATCAATAGACTCCCTACTCCAATCTTA  
CAAGGCAAATGTCCATATGAACTACTCTATCAGAAACATGCCAAGCTTGATCACTT  
GAGAGTGTGTTGGGTGTCTTGTCTTTGCAGCAACACTGCCCAAAGGTGACAAACTTG  
CACCTAGAGCCAAGCGAACCATCTTCATTGGTTATTCTGAGACTCAAAGGGTTAC  
AGGTTGATGACTTGGATAATAAGGTGATCATAGTGAGCAGGGATGTAGTTTTAG

AGAGTTTCAGTTCCCTTTCAAAGAGTCCATCTCCCATGAACCTGATATGTTCACTCG  
AGCAGGTTCACTTAGCTCTGAAGATACAGCTTTGCAGCTAGTGTATAATGATATTTT  
TCCTTCCAGCTTTTCATACTGATGATGATGATACTCCAGTTCTTATTCCCTGACATTGT  
AGAGGCCAATGAGGATATCACTTTGGGGACTCATTCTACCCAAAATCATATCACTT  
CAGCTGATGCTGCACCTTCAGGCCACCTGCATGCTCCTGCAGAGTCAGTTGAGTC  
AGCTGAGCCTGACCTAGCAAATGCTGAATTTGAGCACCACTACTGCTGTAGCTGATC  
CCTCTCTAGTTCCAGCAAACCTGCACACTAGACCTAAACGCAATGCAGGTCCTCCC  
ATCTGGCTCAAGGACTTTGTGACACTGAACAAAGGCTCTAGGGATGTTCCATACCC  
TATAGCCAACCTATGTTTCTATGATCACTTGCCTGTTCACTATCAAGCTTATTTGAGT  
GCTTTCTCCACTTATACTGAACCTAAATCCTTCAAAGAAGCAGCTCAAGATGAGAAA  
TGGATGGAGGCCATGTCCCTTGAGATACAGGCTCTTGAGGATAATAACACCTGGG  
AGATTGTCCCTTTACCCCTGGTAAACAGCCTATAGGGTCCAAATGGGTGTACAAA  
ATTAATACAAAGCTAATGGTGAAGTTGACAGGTTTAAGGCAAGGCTAGTGGCCAA  
GGGATACACTCAGCAAGAAGGCCTTGACTACCATGAAACTTTTTCTCCAGTGGCCA  
AAATGGTCACTGTAAAAGCTGTCATATCTGTTGCTGCTTCCAAGGGCTGGTTCCTTT  
TCCAGATGGATGTCAACAATGCTTTTCTACAAGGTGACCTCATGGAAGAAGTTTATA  
TGTCTCTGCCTCAGGGTTTTACAGCCAAGGGGAGACCAAAGTGTGCAGGCTGTT  
GAATCCCTCTATGGTTTAAAGCAAGCATCAAGGCAGTGGAACATCAAGCTTACCAC  
TGTCTTATGCAGGCTGGTTTTATGCAAAGTGCTTATGATCACTCCTTGTTTACCAA  
AAGAGAGGGGACTGACCTTGTATAATCCTGATTTATGTGGATGATCTGTTAATAA  
CAGGCAGCAGCAATGTTTTGATTTCAGAAGCAAAGGCAACCCTGCATCAGCATTTC  
AAGATGAAAGATTTGGGAGAATAAAATACTTCTTAGGCATTGAGGTGCTGAGATC  
AGAAAAGGGAATCCTACTGAACCAGAGGAAGTATGCACTGGAACCTGATATCAGGT  
GTTGGTCTGGGAGGCTGCAGACCAGTGTCAACCCCAATGGAACAGAACCAAAGGC  
TGACTACTGTAGAATATGACAAGCACTTAGGAAAGACTGATGATGCAGAGTTAGAG  
GATGTGGGTTCTATCAGAGACTGGTGGGAAAGCTTCTCTACTTGACAATCACAAG  
GCCAGATATCAGCTTTGCAGTGCAGGTGCTGAGTCAATTCATGCAGCAACCCAAAC  
AGTCACACCTGGAAGCAGCATTGAGGGTTGTGAAGTACATAAAAGGTTCTCCAGGT  
GTTAGGAA**GCGGCCGCATGCATATG**AGTCTAGCTCAACAGAGCTTTTAACCCAAAT  
TGGTACAATAGAATACAACTTTAGATCATAATTCTCAAAGAAAGAGATTCCCTTAGC  
TATTCTATCTGCCACTCCATTTCTTCTCGGCTTGATGCACAAGCATAAAAATCCTC  
AACTTGCTAAGTAGATACTTTATGTCTTGGATAATTGGATTGAGACTTGACAAGCA  
TAACTTTCATGTAACCAAAGACACAAGTTGCTGAGAATCCACCTCAAAAATGATCTT  
CCTATAATTGAATCGGGATAATGACAGCACAGCCCATCTAAGAGCCTCCACTTCTA  
CTTCCAGCACGCTTCTTACTTTTACCACAGCTCTTGCACCTAACCATAACACCTTCC  
CTGTATGATCGCGAAGCACCCACCCTAAGCCACATTTTAATCCTTCTGTTGGCCAT  
GCCCCATCAAAGTTGCACTTAACCCAAGATTGTGGTGGAGCTTCCCATGTTTCTCG  
TCTGTCCCGACGGTGTGGTGGTGGTCTTTCCTTACATTCTGAGCCTCTTTCCTTC  
TAATCCACTCATCTGCATCTTCTTGTGTCTTACTAATACCTCATTGGTTCCAAATTC  
CCTCCCTTTAAGCACAGCTCGTTTCTGTTCTTCCACAGCCTCCCAAGTATCCAAG  
GGACTAAAGCCTCCACATTCTTCCAGATCAGGATATTCTTGTTTAAGATGTTGAACTC  
TATGGAGGTTTGTATGAACTGATGATCTAGGACCGGATAAGTTCCCTTCTTCATAG  
CGAACTTATTCAAAGAATGTTTTGTGTATCATTCTTGTACATTGTTATTAATGAAAA  
AATATTATTGGTCATTGGACTGAACACGAGTGTTAAATATGGACCAGGCCCAAAT  
AAGATCCATTGATATATGAATTAATAACAAGAATAAATCGAGTCACCAAACCACTT  
GCCTTTTTTAACGAGACTTGTTCCACCAACTTGATACAAAAGTCATTATCCTATGCAA

ATCAATAATCATACAAAAATATCCAATAACACTAAAAAATTAAGAAATGGATAATT  
TCACAATATGTTATACGATAAAGAAGTTACTTTTCCAAGAAATTCAGTATTTTATAA  
GCCCACTTGCATTAGATAAATGGCAAAAAAAAAACAAAAAGGAAAAGAAATAAAGCA  
CGAAGAATTCTAGAAAATACGAAATACGCTTCAATGCAGTGGGACCCACGGTTCAA  
TTATTGCCAATTTTCAGCTCCACCGTATATTTAAAAATAAAAACGATAATGCTAAAAA  
AATAAATCGTAACGATCGTTAAATCTCAACGGCTGGATCTTATGACGACCGTTAG  
AAATTGTGGTTGTCGACGAGTCAAGTAATAAACGGCGTCAAAGTGGTTGCAGCCGG  
CACACACGAGTCGTGTTTATCAACTCAAAGCACAAATACTTTTCCTCAACCTAAAAA  
TAAGGCAATTAGCCAAAAACAACCTTTGCGTGTAACAACGCTCAATACACGTGTCA  
TTTTATTATTAGCTATTGCTTCACCGCCTTAGCTTTCTCGTGACCTAGTCGTCCTCG  
TCTTTTCTTCTTCTTCTATAAAACAATACCCAAAGAGCTCTTCTTCTTACAATT  
CAGATTTCAATTTCTCAAATCTTAAAACTTTCTCTCAATTCTCTTACCGTGATCA  
AGGTAAATTTCTGTGTTTCTTATTCTCTCAAATCTTCGATTTTGTTCGTTTCGATC  
CCAATTTTCGTATATGTTCTTTGGTTTAGATTCTGTAAATCTTAGATCGAAGACGATTT  
TCTGGGTTTGATCGTTAGATATCATCTTAATTCTCGATTAGGGTTTCATAGATATCAT  
CCGATTTGTTCAAATAATTTGAGTTTTGTGGAATAATTACTCTTCGATTTGTGATTTCT  
TATCTAGATCTGGTGTTAGTTTCTAGTTTGTGCGATCGAATTTGTGATTAATCTGA  
GTTTTTCTGATTAACAGGGATCATCAACAAGTTTGTACAAAAAGCAGGCTCTTTAA  
AGTATTTTACAACAATTACCAACAACAACAACAACAACAACAACATTACAATTACTAT  
TTACAATTACAAAAAAAGTTAACATGGACAAGAAGTACAGCATCGGCCTGGCCATC  
GGCACCAACTCTGTGGGCTGGGCCGTGATCACCGACGAGTACAAGGTGCCCAGC  
AAGAAATTCAAGGTGCTGGGCAACACCGACCGGCACAGCATCAAGAAGAACCTGA  
TCGGCGCCCTGCTGTTTCGACAGCGGAGAACAGCCGAGGCCACCCGGCTGAAGA  
GAACCGCCAGAAGAAGATACACCAGACGGGAAGAACCGGATCTGCTATCTGCAAGA  
GATCTTCAGCAACGAGATGGCCAAGGTGGACGACAGCTTCTTCCACAGACTGGAA  
GAGTCTTCTGTTGGAAGAGGATAAGAAGCACGAGCGGCACCCCATCTTCGGCA  
ACATCGTGGACGAGGTGGCCTACCACGAGAAGTACCCACCATCTACCACCTGAG  
AAAGAACTGGTGGACAGCACCGACAAGGCCGACCTGCGGGCTGATCTATCTGGCC  
CTGGCCACATGATCAAGTTCGGGGCCACTTCTGATCGAGGGCGACCTGAACC  
CCGACAACAGCGACGTGGACAAGCTGTTTCATCCAGCTGGTGCAGACCTACAACCA  
GCTGTTTCGAGGAAAACCCCATCAACGCCAGCGCGGTGGACGCCAAGGCCATCCT  
GTCTGCCAGACTGAGCAAGAGCAGACGGCTGGAAAATCTGATCGCCAGCTGCC  
GGCGAGAAGAAGAATGGCCTGTTTCGGCAACCTGATTGCCCTGAGCCTGGGCCTG  
ACCCCAACTTCAAGAGCAACTTCGACCTGGCCGAGGATGCCAACTGCAGCTGA  
GCAAGGACACCTACGACGACGACCTGGACAACCTGCTGGCCAGATCGGCGACC  
AGTACGCCGACCTGTTTCTGGCCGCAAGAACCTGTCCGACGCCATCCTGCTGAG  
CGACATCCTGAGAGTGAACACCGAGATCACCAGGCCCCCTGAGCGCCTCTATG  
ATCAAGAGATACGACGAGCACCACAGGACCTGACCCTGCTGAAAGCTCTCGTGC  
GGCAGCAGCTGCCTGAGAAGTACAAGAGATTTTCTTCGACCAGAGCAAGAACGG  
CTACGCCGGCTACATCGATGGCGGAGCCAGCCAGGAAGAGTTCTACAAGTTCATC  
AAGCCCATCCTGGAAAAGATGGACGGCACCGAGGAAGTCTCGTGAAGCTGAACA  
GAGAGGACCTGCTGCGGAAGCAGCGGACCTTCGACAACGGCAGCATCCCCACC  
AGATCCACCTGGGAGAGCTGCACGCCATTCTGCGGCGGCAGGAAGATTTTACCC  
ATTCTGAAGGACAACCGGGAAAAGATCGAGAAGATCCTGACCTTCCGCATCCCC  
TACTACGTGGGCCCTCTGGCCAGGGGAAAACAGCAGATTCGCCTGGATGACCAGAA  
AGAGCGAGGAAACCATCACCCCTGGAACCTTCGAGGAAGTGGTGGACAAGGGCG

CCAGCGCCCAGAGCTTCATCGAGCGGATGACCAACTTCGATAAGAACCTGCCAA  
CGAGAAGGTGCTGCCAAGCACAGCCTGCTGTACGAGTACTTCACCGTGTACAAC  
GAGCTGACCAAAGTGAAATACGTGACCGAGGGAATGAGAAAGCCC GCCTTCCTGA  
GCGGCGAGCAGAAAAAGCCATCGTGGACCTGCTGTTCAAGACCAACCGGAAAGT  
GACCGTGAAGCAGCTGAAAGAGGACTACTTCAAGAAAATCGAGTGCTTCGACTCC  
GTGGAATCTCCGGCGTGGAAGATCGGTTCAACGCCTCCCTGGGCACATACCAG  
ATCTGCTGAAAATTATCAAGGACAAGGACTTCCTGGACAATGAGGAAAACGAGGAC  
ATTCTGGAAGATATCGTGCTGACCCTGACACTGTTTGAGGACAGAGAGATGATCGA  
GGAACGGCTGAAAACCTATGCCACCTGTTGACGACAAAAGTGATGAAGCAGCTG  
AAGCGGCGGAGATACACCGGCTGGGGCAGGCTGAGCCGGAAGCTGATCAACGGC  
ATCCGGGACAAGCAGTCCGGCAAGACAATCCTGGATTTCTGAAGTCCGACGGCT  
TCGCCAACAGAACTTCATGCAGCTGATCCACGACGACAGCCTGACCTTTAAGAG  
GACATCCAGAAAGCCCAGGTGTCCGGCCAGGGCGATAGCCTGCACGAGCACATT  
GCCAATCTGGCCGGCAGCCCCGCCATTAAGAAGGGCATCCTGCAGACAGTGAAG  
GTGGTGGACGAGCTCGTGAAAGTGATGGGCCGGCACAAGCCCGAGAACATCGTG  
ATCGAAATGGCCAGAGAGAACCAGACCACCCAGAAGGGACAGAAGAACAGCCGC  
GAGAGAATGAAGCGGATCGAAGAGGGCATCAAAGAGCTGGGCAGCCAGATCCTG  
AAAGAACACCCCGTGGAAAACACCCAGCTGCAGAACGAGAAGCTGTACCTGTACT  
ACCTGCAGAATGGGCGGGATATGTACGTGGACCAGGAACTGGACATCAACCGGCT  
GTCCGACTACGATGTGGACGCTATCGTGCCTCAGAGCTTTCTGAAGGACGACTCC  
ATCGATAACAAAGTGCTGACTCGGAGCGACAAGAACC GGGGCAAGAGCGACAAC  
GTGCCCTCCGAAGAGGTCGTGAAGAAGATGAAGAACTACTGGCGCCAGCTGCTGA  
ATGCCAAGCTGATTACCCAGAGGAAGTTCGACAATCTGACCAAGGCCGAGAGAGG  
CGGCCTGAGCGAACTGGATAAGGCCGGCTTCATCAAGAGACAGCTGGTGGAAAC  
CCGGCAGATCACAAAGCACGTGGCACAGATCCTGGACTCCCGGATGAACACTAAG  
TACGACGAGAACGACAAACTGATCCGGGAAGTGAAAGTGATCACCTGAAGTCCA  
AGCTGGTGTCCGATTTCCGGAAGGATTTCCAGTTTTACAAAGTGCGCGAGATCAAC  
AACTACCACACGCCACGACGCCTACCTGAACGCCGTCGTGGGAACCGCCCTG  
ATCAAAAAGTACCCTAAGCTGGAAAGCGAGTTCGTGTACGGCGACTACAAGGTGT  
ACGACGTGCGGAAGATGATCGCCAAGAGCGAGCAGGAAATCGGCAAGGCTACCG  
CCAAGTACTTCTTACAGCAACATCATGAACTTTTTCAAGACCGAGATTACCCTGG  
CCAACGGCGAGATCCGGAAGCGGCCTCTGATCGAGACAAACGGCGAAACAGGCG  
AGATCGTGTGGGATAAGGGCCGGGACTTTGCCACCGTGCGGAAAGTGCTGTCTAT  
GCCCAAGTGAATATCGTGAAAAAGACCGAGGTGCAGACAGGCGGCTTCAGCAA  
GAGTCTATCCTGCCAAGAGGAACAGCGACAAGCTGATCGCCAGAAAGAAGGACT  
GGGACCCTAAGAAGTACGGCGGCTTCGACAGCCCCACCGTGGCCTATTCTGTGCT  
GGTGGTGGCCAAAGTGGAAGGGCAAGTCCAAGAACTGAAGAGTGTGAAAGAG  
CTGCTGGGGATCACCATCATGGAAAGAAGCAGCTTCGAGAAGAATCCCATCGACT  
TTCTGGAAGCCAAGGGCTACAAAGAAGTGAAAAGGACCTGATCATCAAGCTGCC  
TAAGTACTCCCTGTTTCGAGCTGGAAAACGGCCGGAAGAGAATGCTGGCCTCTGCC  
GGCGAACTGCAGAAGGGAAACGAACTGGCCCTGCCCTCCAATATGTGAACTTCC  
TGTACCTGGCCAGCCACTATGAGAAGCTGAAGGGCTCCCCGAGGATAATGAGCA  
GAAACAGCTGTTTGTGGAACAGCACAAACACTACCTGGACGAGATCATCGAGCAG  
ATCAGCGAGTTCTCAAGAGAGTGATCCTGGCCGACGCTAATCTGGACAAGGTGC  
TGAGCGCCTACAACAAGCACAGAGACAAGCCTATCAGAGAGCAGGCCGAGAATAT  
CATCCACCTGTTTACCCTGACCAATCTGGGAGCCCCTGCCGCCTTCAAGTACTTG

ACACCACCATCGACCGGAAGAGGTACACCAGCACCAAGAGGTGCTGGACGCCA  
CCCTGATCCACCAGAGCATCACCGGCTGTACGAGACACGGATCGACCTGTCTCA  
GCTGGGAGGCGACGCCATATCCCTATGACGTGCCCGATTATGCCAGCCTGGGCAG  
CGGCTCCCCCAAGAAAAACGCAAGGTGGAAGATCCTAAGAAAAAGCGGAAAGTG  
GAAGATGCTCCAAGAAGAAGAGAAAGGTCGACGGCATTGGTAGTGGGAGCAACG  
GCAGCAGCGGATCCAACGGTCCGACTGACGCCGCGGAAGAAGAAGCTTTGAGCA  
AGAATTATCATCTTGAGAACGAAGTGGCTCGTCTTAAGAAAGTTCTGGCAGTGG  
GTTCTGGCTCCGGAGGTTCCGGCGGGGAAGAACTGCTTCAAAGAATTACCACC  
TGAAAATGAGGTAGCTAGACTGAAAAGGGGAGCGGAAGTGGGGGCTCCGGGT  
CGGGCGGCTCTGGGGGAGAGGAGTTGCTGAGCAAAAATTATCATTTGGAGAACGA  
AGTAGCACGACTAAAGAAAGGTCCGGATCGGGTGGTTCAGGATCTGGAGGTTCC  
GGTGGGGAGGAGTTACTCTCGAAAATTATCATCTCGAAAACGAAGTGGCTCGGC  
TAAAAAAGGGCAGTGGTTCTGGAGGATCTGGGTCCGGGGGATCCGGGGGTGAAG  
AGCTATTATCTAAAAACTACCACCTCGAAAATGAGGTGGCACGCTTAAAAAAGGGA  
AGTGGCAGTGGTGGGTCGGGATCTGGCGGGTCCGGTGGAGAAGAGCTACTATCC  
AGAATTATCATCTTGAGAACGAGGTAGCGCGTTTGAAGAAGGTTCCGGCTCAG  
GAGGATCTGGGTCAGGGGGCTCAGGAGGGGAGGAACTGCTCTCGAAGAACTATC  
ATCTTGAAGATGAGGTCGCTCGATTA AAAAAGGGATCGGGCAGTGGTGGGTCCGG  
CTCCGGTGGTTCGGGGGGCGAGGAACTACTTCAAAGAATTACCACCTCGAAAAC  
GAAGTAGCTCGATTAAGAAAGGTTCCGGGTCGGGTGGCTCAGGTTCCGGGAGGAT  
CCGGCGGTGAAGAATTACTGAGTAAAATTATCATCTGGAAAATGAGGTAGCGAGA  
CTAAAAAAGGGGAGTGGTTCTGGCGGTTCCGGATCTGGCGGGTCCGGAGGGGAG  
GAATTGCTATCGAAAATTATCATCTTGAGAACGAAGTTGCTAGGCTCAAAAAGGG  
CTCAGGCTCAGGCGGGTCCGGGTCCGGGCTCAGGGGGCTCAGGTGGCTAACCCGGGGGCG  
CGCCATGATAAC TAGAGTCCTGCTTAAATGAGATATGCGAGACGCCTATGATCGCA  
TGATATTTGCTTCAATTCTGTTGTGCACGTTGTA AAAAACCTGAGCATGTGTAGCT  
CAGATCCTTACCGCCGGTTCCGGTTCATTCTAATGAATATATCACCCGTTACTATCG  
TATTTTTATGAATAATATTCTCCGTTCAATTTACTGATTGTACCCTACTACTTATATGT  
ACAATATTA AAATGAAAACAATATATTGTGCTGAATAGGTTTATAGCGACATCTATG  
ATAGAGCGCCACAATAACAACAATTGCGTTTTATTATTACAAATCCAATTTTAAAAA  
AAGCGGCAGAACCGGTCAAACCTAAAAGACTGATTACATAAATCTTATTCAAATTC  
AAAAGTGCCCAAGGGGCTAGTATCTACGACACACCGAGCGGCGAACTAATAACGC  
TCACTGAAGGGAAGTCCGGTTC CCGGCCGGCGGCATGGGTGAGATTCCTTGAAG  
TTGAGTATTGGCCGTCCGCTCTACCGAAAGTTACGGGCACCATTCAACCCGGTCC  
AGCACGGCGGCCGGGTAACCGACTTGCTGCCCGAGAATTATGCAGCATTTTTTT  
GGTGTATGTGGGCCCCCAAATGAAGTGCAGGTCAAACCTTGACAGTGACGACAAAT  
CGTTGGGCGGGTCCAGGGCGAATTTTGCGACAACATGTCGAGGCTCAGCAGGAC  
CGGCATGCAAGCTAGCTTACTAGTGATATTCTATAGTGTACCTAAATCTGCGGC
